# Supplementary material for: A database of water and heat observations over grassland in the north-east of Japan
Source: Copernicus journal article supplement (doi:10.5194/essd-2018-58), 2018-08-06
Supplement: Supplementary file 1 [file Datebase_A database of water and heat observation of a grassland in northeast of Japan.xlsx]

## Sheet: All data
Date	Air tempearture_average	Air tempearture_maximum	Air tempearture_minimum	air_T_12.5m	air_T_29.5m	ST1 0.02m Soil temperature degree C	ST2 0.01m Soil temperature degree C	ST3 0.05m Soil T delete 2003-2004	ST4 1.00m Soil temperature degree C	TD1 Dew point temperature (1.6 m height) degree C	TD2 Dew point temperature (12.3 m height) degree C	TD3 Dew point temperature (29.5m height) degree C	Precipitation	Relative humidity	Shortwave radiation	Net Radiation	Longwave Radiation	Sensible heat flux (covariance) 1.6m degree C*m/s	Soil heat flux	Air Pressure	Wind speed
1981-08-01	27.3	33	22	27.3	27.5	25	26.3	23.9	20				0		243.054	120		0.0147	8		0.9
1981-08-02	27.3	33.1	22.3	27.2	27.5	24	26.6	24.1	20.1				0		249.998	128		0.0139	11		0.98
1981-08-03	25.4103	30.6		23.5	23.8	22.9	25.3	23.3	21				0		232.637	113		0.0167	6		0.92
1981-08-04	25.6	30.9	20.3	25.6	25.7	24.9	27.2	25.2	24.6				0		291.665	142		0.0079	-15		1.74
1981-08-05	23	31.9		23.3	23.7	24.6	26.4	24.5	21.9				0.5		178.24	84		0.0266	0		0.91
1981-08-06	21.2	27.9	14.2	21.9	22.1	23.7	25.2	24.9	22.1				0		196.758	86		0.0167	-1		1
1981-08-07	22.9	28.1	18.7	23	22.8	24.3	25.2	24.6	22				0.5		166.666	80		0.007	2		1.34
1981-08-08	22.6	26.1	19.8	22.8	22.6	23.8	24.7	24.4	21.9				1.5		94.9068	47		0.0084	4		0.62
1981-08-09	24.3	29.5	19.4	24.4	24.3	24.5	25	24.1	21.8				0		157.406	77		0.0502	5		0.66
1981-08-10	25.6	32.2	20.5	25.7	25.6	25.4	25.7	24	21.7				0		172.453	89			5		0.82
1981-08-11	26.8	31.6	23.9	26.8	26.7	26.5	26.6	24.1	21.6				4		173.61	93		0.031	7		1.17
1981-08-12	26.4	29	23.9	26.6	26.5	25.5	26	24.2	21.6				0		70.6014	34		-0.0016	5		1.33
1981-08-13	24.2	28.4	22	24.3	24.3	25.1	26	24.2	21.6				3.5		208.332	112		-0.0066	5		1.16
1981-08-14	23.6	26.3	21.6	23.6	23.5	24.2	25.2	24.2	21.6				0		126.157	65		0.0076	5		0.92
1981-08-15	22.7	26.7	19.9	22.7	22.6	24.2	25.1	24.1	21.6				0		184.027	92		0.0214	5		1.79
1981-08-16	22.4	27.6	17.9	22.3	22.5	24.6	25.3	24	21.6				0		278.933	129		0.0139	6		1.5
1981-08-17	21.6	26.5	17.9	21.5	21.7	24.2	25.2	24	21.6				0		240.739	110		0.009	5		1.53
1981-08-18	24.1	29.7	18.2	23.7	23.8	25.3	25.6	23.9	21.6				0		228.008	111		0.0395	5
1981-08-19	25.9	29.5	22.6	26	26.1	25.9	26.2	24	21.6				0		134.258	62		0.0231	3		1.45
1981-08-20	24.5	27.9	22.3	24.4	24.6	25.4	26.2	24.1	21.6				0		173.61	89		0.0074	2		1.77
1981-08-21	23.5	26.8	22	23.3	23.3	24.5	25.4	24.2	21.6				3		72.9162	42		0.001	1		1.06
1981-08-22	25.3	28.6	23.3	25.4	25.7	24.6	25.3	24.1	21.6				29		94.9068	51		-0.0059	1		2.07
1981-08-23	25.7	30.7	22	25.9	26.1	24.7	25.4	24.1	21.9				29.5		141.203	69		-0.012	2		1.19
1981-08-24	23.9	29.3	18.6	24.1	24.4	24.5	25.4	24.1	22				0		237.267	109		0.0125	3		0.66
1981-08-25	23.3	28.1	16.9	23.4	23.7	23.9	24.8	24.1	22				0.5		170.138	83		0.0125	4		0.88
1981-08-26	27.2	30.6	24.7	27.1	27.3	25.5	25.9	24	22				1		182.869	97		0.0039	5		2.79
1981-08-27	27.5	31.6	24.5	27.5	27.7	25.5	26	24.1	21.9				0		201.388	96		0.0081	6		2.53
1981-08-28	21.3	22.5	20.6	21.3	21.4	22.1	24.1	24.2	22.3				37		45.1386	21		-0.0017	5		1.56
1981-08-29	24	27.9	20.7	23.8	23.9	23.7	24.3	24	22.7				0		114.583	62		0.0115	6		0.72
1981-08-30	27.2	32.3	22.6	27.3	27.5	25.9	26	23.9	22.5				0		249.998	124		0.0172	8		1.5
1981-08-31	26.3	33.4	22.1	26.6	27	26.3	26.7	24.1	22.4				0		234.952	114		0.0226	8		1.26
1981-09-01	24.6	28.9	21.4	24.4	24.7	25.2	26.2	24.3	22.3				0		179.397	91		0.0117	7		1.47
1981-09-02	25.5	30.6	21.4	25.3	25.5	25.2	26	24.3	22.2				0		162.036	78		0.0129	6		1.45
1981-09-03	23.5	26.9	21.2	23.5	23.8	24	25.3	24.4	22.2				0		135.416	64		0.0047	4		1.8
1981-09-04	26.6	29.4	22.2	26.6	26.8	25.1	25.8	24.3	22.2				6.5		124.999	56		-0.003	4		2.02
1981-09-05	20.7	22.5	18.5	20.7	20.9	21.9	24.2	24.3	22.2				0		94.9068	48		0.0006	4		1.02
1981-09-06	20.3	24.2	17.4	20.2	20.3	21.7	23.3	24	22.2				0		182.869	88		0.0152	4		1.14
1981-09-07	19.3	24.7	13.1	19.5	19.8	21.1	22.9	23.7	22.2				0		232.637	101		0.0203	5		1.08
1981-09-08	18.7	22.9	15.2	18.8	18.9	20.2	22.3	23.4	22.1				22.5		105.323	45		0.0136	4		1.15
1981-09-09	20.6	24.3	17.6	20.4	20.4	21.3	22.4	23.1	22.1				1		150.462	78			5		0.91
1981-09-10	20.4	25.2	17.6	20.3	20.5	21.1	22.6	22.9	22				4		109.953	48		0.0074	5		0.85
1981-09-11	19.1	22.2	16.5	19	19.1	20.1	21.9	22.8	22				0.5		135.416	69		0.0068	4		1.37
1981-09-12	17.6	19.4	16	17.5	17.6	19.2	20.9	22.6	22				21		50.9256	22		0.0062	4		0.61
1981-09-13	20.3	24.7	17.3	20.2	20.2	20.5	21.6	22.2	22				1		136.573	64		0.0113	4		0.9
1981-09-14	19.2	23.4	16.2	19.1	19.2	20.2	21.7	22.1	21.9				5.5		155.092	77		0.0152	4		1.04
1981-09-15	18.6	23.8	13.9	18.5	18.7	19.8	21.4	22	21.7				0		188.656	80		0.0186	4		0.79
1981-09-16	17.8	24.1	12.5	18.2	18.6	19	20.9	21.9	21.6				0		231.48	87		0.0183	4		0.92
1981-09-17	17.3	24.1	10.3	17.5	18	18.6	20.4	21.7	21.5				0		219.906	78		0.0209	5		0.87
1981-09-18	17.9	24.9	11.2	18.1	18.5	19	20.5	21.5	21.4				0		216.434	82		0.0218	4		0.82
1981-09-19	17.9	21.8	14.8	18	18.2	18.8	20.4	21.3	21.3				0.5		61.3422	24		0.0089	4		0.77
1981-09-20	18	20.6	15.6	18	18	18.4	20	21.1	21.2				22		45.1386	20		0.0049	4		0.69
1981-09-21	19.1	24	15.6	19.2	19.4	18.8	20.2	20.9	21.1				0		151.619	63		0.0109	4		0.97
1981-09-22	18.7	23.4	13.1	18.7	18.8	19	20.2	20.8	21				0		144.675	55		0.0153	4		0.75
1981-09-23	20	26.1	14.2	20.2	20.6	19.9	20.9	20.8	20.9				0		188.656	72		0.0177	5		0.74
1981-09-24	20.7	26.7	14.6	20.9	21.2	20.2	21.2	20.8	20.8				0		170.138	71		0.0139	5		0.76
1981-09-25	19.7	20.4	18.8	19.7	19.9	19.3	20.8	20.9	20.7				16		33.5646	13		0.0436	5		1.02
1981-09-26	20.2	21.5	19.2	20	20	20	21	20.9	20.7				10.5		39.3516	23		-0.0125	5		0.58
1981-09-27	22.6	28.7	18.6	22.5	22.6	22.1	22.5	20.9	20.7				0		188.656	94		0.0116	6		0.83
1981-09-28	20.1	26.3	12.3	20.7	21.1	21.3	22.5	21	20.6				0		133.101	43		0.0141	5		0.65
1981-09-29	15.9	19.2	12.7	16	16.2	17.7	20.1	21.1	20.6				0		121.527	48		0.0095	5		0.74
1981-09-30	17.7	21.3	13.7	17.6	17.7	18.1	19.7	20.9	20.6				0		96.0642	45		0.0107	5		0.76
1981-10-01	17.5	18.4	16.8	17.4	17.3	17.9	19.6	20.7	20.5				28		41.6664	15		-0.0143	5		0.67
1981-10-02	18.9	25.2	13.3	19.4	19.9	18.6	20	20.4	20.7				14		146.99	56		0.0108	5		0.67
1981-10-03	15.9	21.6	8.4	16.7	17.4	17.5	19.4	20.2	20.6				0		203.702	68		0.0156	5		0.87
1981-10-04	15.3	23.1	6.2	16	16.7	16.6	18.5	20	20.4				0		206.017	73		0.0083	5		0.25
1981-10-05	18.7	23.3	15.1	19.2	19.4	17	18.5	19.7	20.3				0		57.87	16		0.0019	5		1.2
1981-10-06	17	22.8	12	17.5	18.1	16.3	18.1	19.6	20.2				0		103.009	32		0.0051	5		0.75
1981-10-07	18	21.8	15.2	18.1	18.3	17.1	18.4	19.4	20.1				0		100.694	42		0.0041	5		1.07
1981-10-08	17.5	18.4	15.7	17.5	17.6	16.8	18.2	19.3	20				21		27.7776	11		0.0048	5		0.95
1981-10-09	18.4	21	17	18.4	18.4	17.8	18.7	19.2	19.9				13.5		21.9906	14		-0.0064	5		0.81
1981-10-10	18.5	24.2	11.8	18.8	19.2	18.5	19.6	19.2	19.8				0		193.286	71		0.0146	5		1.26
1981-10-11	16	21.6	10.7	16.2	16.5	16.8	18.6	19.2	19.7				0		164.351	64		0.0187	5		0.65
1981-10-12	16.5	22.1	12.4	16.8	17	16.8	18.4	19.1	19.6				0		119.212	35		0.0091	5		0.69
1981-10-13	16.9	22.5	9.8	17.1	17.6	16.4	17.9	19	19.6				0		159.721	65		0.0132	5		1.06
1981-10-14	17.1	21.1	10.7	17.6	17.7	17	18.5	18.9	19.5				0.5		91.4346	25		0.0061	5		0.69
1981-10-15	13.7	16.2	11.5	13.8	13.8	14.7	17	18.9	19.4				0		72.9162	34		0.0056	5		0.78
1981-10-16	12.7	16.6	8	13.2	13.5	14.3	16.4	18.6	19.4				0		68.2866	9		0.0082	4		0.62
1981-10-17													0					-0.0007	2		0.3
1981-10-18	15.4	21.9	8	15.8	16.2	14.8	16.5	18.1	19.2				0		160.879	59		0.0124	4		0.95
1981-10-19	17.5	24.1	11.4	17.7	18.1	16.3	17.4	17.9	19.1				0		159.721	59		0.0166	5		0.81
1981-10-20	14.8	19.7	11.9	15	15.2	15.7	17.5	17.9	19				0		148.147	52		0.0131	4		0.92
1981-10-21	14.1	17.1	11.7	14.4	14.6	14.6	16.6	17.9	18.9				0		76.3884	24		0.0039	4		0.79
1981-10-22	15.7	21.6	12	15.7	15.7	15.2	16.2	17.8	18.8				153		33.5646	11		-0.0253	5		0.99
1981-10-23	18.7	22.1	12.1	18.8	18.9	17.8	18.7	17.5	18.4				13.5		109.953	21		0.0187	4		0.99
1981-10-24	11.3	17.5	4.2	12.5	13	14	16.6	17.7	18.4				0		172.453	37		0.0154	4		0.87
1981-10-25	12.3	19.7	3.7	13.5	14.1	12.7	15.1	17.5	18.4				0		171.295	44		0.0176	3		0.82
1981-10-26	11.8	17.7	5.5	12.3	12.5	12.8	15	17.1	18.3				0		152.777	33		0.0131	4		0.84
1981-10-27	12.9	18.2	7.6	13.1	13.3	12.7	14.7	16.8	18.3				0		149.305	35		0.0063	5		1.07
1981-10-28	11.7	17.6	5.9	12.2	12.6	11.8	14.1	16.6	18.2				0		127.314	28		0.0103	4		0.73
1981-10-29	11.6	14.3	7.5	11.9	12.1	11.9	13.7	16.3	18.1				6.5		34.722	11		0.0048	5		0.61
1981-10-30	13.7	18.6	9	14	14.1	14.3	14.8	16.1	18				0		124.999	40		0.008	-1		0.78
1981-10-31	13.3	18.8	6.6	13.9	14.8	14.2	14.5	16	17.9				0		124.999	42		0.0133	0		0.58
1981-11-01	14.5	21.1	9.3	14.7	14.9	14.8	15.3	16	17.8				0		134.258	36		0.0096	0		1.26
1981-11-02	12.3	13.3	10.8	12.4	12.5	12.5	14.3	16	17.7				11.5		21.9906	6		-0.0007	0		2.14
1981-11-03	12.9	15.8	11.3	13.1	13.2	13.6	14.3	15.9	17.6				0		35.8794	9		0.0036	0		0.54
1981-11-04	13.6	17.2	10.6	14	14.4	14.2	14.6	15.8	17.5				0		79.8606	17		0.005	-2		0.56
1981-11-05	12	15.3	9.7	12.1	12.2	12.9	14.2	15.7	17.4				0		70.6014	20		0.0021	-4		1.02
1981-11-06	7.3	10.2	6.2	7.3	7.2	9.9	12.6	15.6	17.3				14.5		23.148	8		0.0143	-10		1.37
1981-11-07	7	8.1	6	6.9	6.7	10.1	11.8	15.3	17.2				0.5		25.4628	8		-0.0208	-6		0.5
1981-11-08	6.4	12.6	0.4	7.5	7.8	9.8	11.7	14.9	17				0		144.675	29		0.023	-8		0.64
1981-11-09	4.3	9.3	-0.3	4.9	5.2	7.5	10.3	14.5	16.9				0		69.444	9		0.0085	-9		0.45
1981-11-10	4.9	12.3	-0.8	5.8	6.1	7.7	9.9	14.1	16.7				0		148.147	32		0.0213	-8		0.61
1981-11-11	5.5	15.6	-0.4	7	7.7	7.4	9.6	13.6	16.6				0		135.416	25		0.0169	-7		0.8
1981-11-12	5.9	13.4	-0.9	7.3	8.4	7.2	9.3	13.2	16.5				0		134.258	27		0.0157	-6		0.58
1981-11-13	6.1	14.8	0.2	7.6	8.3	7.4	9.2	12.9	16.3				0		130.786	26		0.0192	-5		0.57
1981-11-14	7	15.4	-0.7	8.4	9.5	7.5	9.2	12.6	16.1				0		133.101	26		0.0153	-5		0.53
1981-11-15	7.3	14.5	0.5	8.1	8.7	8	9.2	12.4	15.9				0		84.4902	18		0.0117	-2		0.63
1981-11-16	10.4	20.6	4.7	11.1	11.4	10.1	10.4	12.2	15.8				0		107.638	27		0.0129	0		0.7
1981-11-17	8.6	12.4	6.4	8.8	8.8	9.4	10.6	12.2	15.6				0		90.2772	23		0.0087	-1		0.82
1981-11-18	5.1	11.8	0.3	6.8	7.4	7	9.7	12.3	15.4				0		130.786	15		0.0192	-6		0.47
1981-11-19	4.7	13.6	-2	5.9	6.7	5.9	8.4	12.2	15.3				0		124.999	15		0.0144	-5		0.56
1981-11-20	7.7	15	2.4	8.6	9.1	8.2	9	12	15.2				0		97.2216	18		0.0094	0		0.63
1981-11-21	8.5	13.1	3.7	9.1	9.5	8	9.4	11.9	15.1				0		78.7032	12		0.0036	-3		1.11
1981-11-22	5.4	12.2	-0.6	6.8	7.2	6.6	9.1	11.8	14.9				0		130.786	8		0.0145	-5		0.63
1981-11-23	1.7	5.3	-2.8	2.6	3.2	4.1	7.1	11.7	14.8				0		26.6202	-7		0.0037	-9		0.64
1981-11-24	9.1	17.6	1.1	9.7	10.2	7.3	8	11.4	14.7				0		123.842	25		0.0105	1		1.08
1981-11-25	7.3	9.6	4.1	7.5	7.4	7.2	8.5	11.2	14.5				0		46.296	10		0.002	-3		0.95
1981-11-26	6.4	7.5	5	6.4	6.3	7.5	8.6	11.2	14.4				10.5		33.5646	8		-0.0126	-2		0.96
1981-11-27	8	9.4	6.6	7.9	7.7	8.7	9.1	11.1	14.3				12.5		21.9906	7			0		0.66
1981-11-28	5.4	10.3	0.5	6.1	6.2	6.6	8.8	11.1	14.1				0		119.212	3		0.0099	-6		0.84
1981-11-29	3.5	8.7	-1.1	4.3	4.5	4.2	7.1	11	13.9				0		128.471	3		0.0109	-7		0.8
1981-11-30	3.4	8.6	-3.1	3.7	3.8	4.9	6.7	10.7	13.8				0		60.1848	11		0.0065	-4		0.72
1981-12-01	5.5	6.1	3.8	5.4	5.2	6.5	7.6	10.5	13.7				2		23.148	7		0.002	-3		1.16
1981-12-02	4.7	9.7	-1.7	5	5	5.1	7.3	10.4	13.6				0		130.786	7		0.0177	-6		1.77
1981-12-03	1	8.2	-4.9	2.9	3.5	2.9	5.9	10.2	13.5				0		123.842	-2		0.0104	-6		0.61
1981-12-04	0.9	9.9	-4.8	2.4	3.2	3.1	5.5	9.9	13.4				0		112.268	7		0.0121	-4		0.56
1981-12-05	3.2	11	-2.8	4.4	4.9	4	5.6	9.6	13.3				0		79.8606	-1		0.0062	-3		0.7
1981-12-06	3.7	10.5	-2.3	5.3	6.3	4.2	5.8	9.4	13.1				0		96.0642	6		0.0018	-3		0.64
1981-12-07	4.6	10.7	-1	5.3	6	5	6.2	9.3	13				0		91.4346	10		0.0103	-1		0.63
1981-12-08	3.3	10.4	-2.1	4.7	5	3.6	6	9.2	12.8				0		118.055	5		0.0112	-5		0.6
1981-12-09	2.9	12.3	-3.4	4.4	5.4	3.2	5.5	9.1	12.7				0		115.74	2		0.0117	-4		0.85
1981-12-10	3.2	10.2	-3.4	4.8	5.4	2.9	5.2	9	12.6				0		116.897	-6		0.0087	-1		0.65
1981-12-11	2.6	8.3	-3.6	3.4	4.3	3.3	4.9	8.8	12.5				0		72.9162	1		0.007	4		0.65
1981-12-12	5.4	14	0.4	6.8	7.2	4.6	5.8	8.6	12.4				0		106.481	4		0.0106	5		0.68
1981-12-13	5.6	10.3	1.2	6.1	6.3	3.1	5.5	8.6	12.2				0		120.37	-14		0.0148	4		1.97
1981-12-14	2.7	7.6	-1.1	3.1	3.3	1.7	4.6	8.5	12.1				0		116.897			0.0146	4		1.78
1981-12-15	1	7.4	-6	2.2	2.4	0.9	3.8	8.3	12				0		121.527	-11		0.014	4		1.46
1981-12-16	1.1	10	-5.3	4.2	4.9	1.1	3.5	8	11.9				0		116.897	-2		0.0114	4		0.57
1981-12-17	1.4	10.8	-3.9	3.4	4.3	1.7	3.6	7.8	11.8				0		114.583	0		0.0114	4		0.72
1981-12-18	1.7	10.2	-4.8	4	5	1.6	3.6	7.6	11.6				0		114.583	3		0.0103	4		0.56
1981-12-19	4.3	11.5	-3.7	5	5.6	3.2	3.9	7.4	11.5				1		87.9624	14		0.0147	4		0.7
1981-12-20	7.3	11.8	4.5	7.7	7.8	5	5.7	7.4	11.4				2		99.5364	4		0.0121	5		1.99
1981-12-21	4.2	11.8	-1.1	6.3	6.8	3.2	4.9	7.5	11.2				0		113.425	-6		0.0096	4		0.7
1981-12-22	2.6	11.7	-2.8	4.1	4.8	3.1	4.6	7.5	11.1				0		91.4346	7		0.0086	4		0.61
1981-12-23	2.9	13	-2.7	4.6	5.5	3.1	4.5	7.5	11				0		72.9162	-2		0.0049	4		0.54
1981-12-24	4	12.1	-2.2	5.1	6	2.6	3.8	6.5	9.6				0		86.805	0		0.0051	2		0.98
1981-12-25	1.5	5.2	-4.6	2.1	2.4	2.2	3.8	7.3	10.9				0		34.722	-9		0.0023	0		0.57
1981-12-26	1.7	11	-3.7	3.3	4.2	2.2	3.9	7.1	10.8				0		105.323	16		0.0096	0		0.57
1981-12-27	2.5	13.2	-4.4	4.5	5.5	2.4	3.9	7	10.7				0		99.5364	14		0.0092	0		0.55
1981-12-28	6.8	15.8	-1.4	7.3	7.8	3.7	4.3	6.6	10.2				0		101.851	11		0.0051	0		1.02
1981-12-29	9.1	15.4	2.7	9.7	10.1	6.1	5.9	6.9	10.5				0		91.4346	7		0.0053	0		1.08
1981-12-30	7.4	12	2.4	8.1	8.5	5.8	6.5	7.2	10.4				0		94.9068	11		0.0054	0		1.79
1981-12-31	3.8	5.2	3	3.9	3.7	5	6.2	7.4	10.3				1		12.7314	-1		0.0027	0		0.61
1982-01-01	4.3	11	-1.6	5	4.9	5.3	6.1	7.5	10.3				0		111.11	18		0.0137	4		0.69
1982-01-02	4.8	11.3	0	5.6	5.7	4.6	6.1	7.6	10.3				0		115.74	1		0.0103	4		0.85
1982-01-03	1.8	7.8	-5.8	2.9	3.4	2.7	5	7.6	10.3				0		121.527	9		0.0105	3		0.58
1982-01-04	5.6	8.5	2.3	5.5	5.3	5.8	5.7	7.5	10.3				8		46.296	19		0.0133	4		0.76
1982-01-05	9.9	15.8	6.2	10	9.9	8.9	7.9	7.5	10.1				17.5		106.481	29		0.0023	5		0.94
1982-01-06	4.8	7.6	-0.5	5.2	5.1	5.5	7.3	7.8	10				0		75.231	6		0.0033	4		1.11
1982-01-07	0.5	8.6	-5.4	1.5	2	2.5	5.4	7.9	10				0		120.37	7		0.0128	3		1.28
1982-01-08	-0.2	4.9	-6.3	0.4	0.5	1.8	4.3	7.7	10				0		115.74	7		0.0099	3		0.72
1982-01-09	1.9	9.9	-3.1	3.4	3.7	2.9	4.5	7.4	10				0		112.268	-2		0.0094	3		0.84
1982-01-10	4	10.7	-2.8	5.1	5.5	3.1	4.5	7.2	10				0		123.842	5		0.008	3		0.8
1982-01-11	4.2	6.3	1.8	4.4	4.5	4.2	5.1	7.1	10				0		46.296	9		0.0017	3		1.19
1982-01-12	6.1	13.2	0.8	6.6	7.1	5.3	5.5	7.1	10				0		78.7032	10		0.0086	4		0.7
1982-01-13	5.7	10.4	1.2	6.4	6.9	4.8	5.8	7.2	9.9				0		63.657	10		0.0019	3		1
1982-01-14	2.7	7.7	-2.9	3.9	4.4	4	5.7	7.3	9.9				0		67.1292	-4		0.0051	3		0.64
1982-01-15	1.5	8.7	-5.5	2.1	2.3	2.8	4.6	7.3	9.8				0		93.7494	-1		0.0058	3		0.98
1982-01-16	0.8	3	-0.4	0.9	0.6	3.1	4.6	7.2	9.8				0.5		60.1848	10		0.0058	3		1.13
1982-01-17	-0.3	5.8	-6	0.6	0.8	2.5	4.4	7	9.8				0		107.638	5		0.0078	3		0.72
1982-01-18	0.1	7.1	-7.3	0.6	0.9	2.6	4	6.9	9.7				1.5		108.796	21		-0.0058	3		0.45
1982-01-19	2	8.1	-3.2	2.4	2.7	2.5	4.3	6.8	9.7				0		126.157	0		-0.0012	3		1.45
1982-01-20	1.2	6.6	-3	1.6	1.8	1.1	3.6	6.7	9.7				0		135.416	-6		-0.0166	3		1.83
1982-01-21	1.4	10.5	-6.4	3.3	3.7	1.3	3.3	6.5	9.6				0		133.101	7		0.0077	3		0.79
1982-01-22	4.4	12.1	-4.5	5.4	6.6	2.7	3.7	6.4	9.6				0		118.055	14		0.0092	3		0.88
1982-01-23	6.3	12.1	0.4	6.4	6.3	4.5	5.3	6.3	9.5				0		99.5364	3		-0.0085	2		1.89
1982-01-24	3.8	10.8	-2.9	4.7	4.9	2.3	4.4	6.4	9.4				0		121.527	4		0.003	1		0.98
1982-01-25	2.9	10	-3.1	4.1	4.5	2.1	4.2	6.5	9.3				0		116.897	9		-0.0081	2		1.26
1982-01-26	2.5	8.4	-4.5	3.3	3.7	2.1	3.8	6.4	9.3				0		127.314	17		0.0134	3		0.99
1982-01-27	3.9	8	-1.6	4.5	4.6	3.5	4.8	6.3	9.3				0		89.1198	9		0.004	3		0.96
1982-01-28	2.6	8.6	-2.5	2.9	2.9	2.9	4.5	6.4	9.2				0		118.055	33		0.0152	3		0.92
1982-01-29	-0.2	4.3	-5.1	0.2	0.1	2.4	4.6	6.4	9.2				1		148.147	6		0.0135	2		2.2
1982-01-30	0.2	5.1	-5.6	0.7	0.6	1	3.4	6.4	9.1				0		142.36	-4		0.0183	2		1.71
1982-01-31	1.1	7.8	-6.9	1.9	2.1	1.8	3	6.2	9.1				0		138.888	16		0.015	2		0.75
1982-02-01	2	8.9	-3.8	2.8	3.1	2.4	3.5	6	9				0		128.471	6		0.0143	3		1.01
1982-02-02	-0.3	6.4	-6.7	1.1	1.5	1.4	3.1	5.9	9				0		150.462	6		0.0188	3		0.9
1982-02-03	-1.2	7.8	-8.2	1.2	2.1	1.1	2.7	5.9	8.9				0		124.999	11		0.0163	3		0.54
1982-02-04	2.5	9.4	-2.2	3	3.2	2.3	3	5.7	8.9				4.5		82.1754	23		0.004	3		1.13
1982-02-05	0.5	6.1	-4.6	1.1	1.3	3.2	3.8	5.7	8.8				1.5		160.879	22		0.041	4		1.17
1982-02-06	0.2	6.6	-7.9	1.5	1.9	1.8	3.4	5.7	8.8				0		115.74	3		0.0081	3		0.89
1982-02-07	0.9	3.9	-2.9	1.1	1	1.3	3.1	5.7	8.7				0		159.721	4		0.0197	3		2.28
1982-02-08	0.4	6.2	-5.1	1.1	1.2	1.4	2.8	5.6	8.6				0		156.249	16		0.0178	3		1.15
1982-02-09	-0.1	7	-9.1	0.7	1	1.5	2.7	5.5	8.6				0		159.721	22		0.0144	3		0.93
1982-02-10	1.1	7.7	-5.2	1.6	2	1.8	2.9	5.4	8.5				0		162.036	15		0.0168	3		1.25
1982-02-11	2.9	9.8	-4.8	3.8	4	1.9	2.9	5.4	8.5				0		166.666	19		0.0223	3		1.32
1982-02-12	3.6	8.5	-2.5	3.8	3.7	2.7	3.2	5.3	8.4				0		70.6014	14		0.0076	3		1.54
1982-02-13	4.1	6.5	1.9	4.1	3.9	3.5	4.1	5.3	8.4				0		81.018	11		0.0088	3		1.79
1982-02-14	1.9	8.6	-5.4	2.6	2.7	3.3	4	5.5	8.3				0		164.351	24		0.0186	3		0.77
1982-02-15	2.6	9.2	-3	3.2	3.2	3.7	4.2	5.6	8.3				0		172.453	33		0.0197	3		0.76
1982-02-16	4.9	12.2	-2.5	5.3	5.4	4.2	4.8	5.7	8.3				0		167.823	26		0.0176	3		1.05
1982-02-17	4.7	7.4	1.8	4.8	4.6	2.6	5.1	5.8	8.3				5		28.935	1		-0.0016	3		2.32
1982-02-18	4.1	10.1	-2.3	4.6	4.9	3.1	5	5.9	8.3				0		172.453	39		-0.0085	4		1.03
1982-02-19	6.6	11.6	1.9	6.6	6.4	4.6	5.8	6	8.3				0		77.5458	24		0.0065	4		1.06
1982-02-20	7.2	11.3	5.3	7.5	7.4	5.6	6.8	6.2	8.3				3		46.296	16		0.0065	4		0.59
1982-02-21	7.3	9.4	4.3	7.5	7.5	4.9	6.9	6.5	8.3				6.5		20.8332	4		-0.0006	4		1.5
1982-02-22	5.3	11.1	-1.1	5.8	6	5.6	7.2	6.7	8.3				0.5		166.666	33		0.0178	4		0.87
1982-02-23	3.6	11	-2.7	4.5	5.1	3.7	6	6.9	8.4				0		136.573	19		0.0112	4		1.14
1982-02-24	2.3	4	1.3	2.3	2	0.6	5.4	6.9	8.4				0		47.4534	12		0.0041	3		1.28
1982-02-25	3.5	7.8	0.6	3.6	3.5	3.1	5.5	6.9	8.5				0		163.193	22		0.0193	3		1.66
1982-02-26	1.4	7.3	-6	2.2	2.1	0.8	4.8	6.8	8.5				0		188.656	22		0.0207	3		1.15
1982-02-27	2.5	9.1	-4.7	3.5	3.9	1.5	4.3	6.6	8.6				0		138.888	21		0.012	3		0.67
1982-02-28	5.3	12.6	-2.9	6.1	6.3	3.7	5.3	6.5	8.6				0		134.258	27		0.0136	4		0.7
1982-03-01	5.2	6.4	3.1	5.3	5.2	4.3	6.2	6.5	8.6				12			17		0.0154	0		0.94
1982-03-02	3.1	9.1	-2	3.5	3.4	4.5	6.5	6.6	8.3				4		151.619	34		0.0126	0		0.75
1982-03-03	2.6	9.7	-4	4.1	4.4	3.4	6	6.7	8.3				0		202.545	53		0.019	0		0.73
1982-03-04	4.2	11.2	-3.8	4.8	5.1	4	6.1	6.7	8.3				0		168.98	38		0.0185	0		0.66
1982-03-05	8.9	13.7	4.7	9.4	9.7	5.7	7.1	6.8	8.4				1		45.1386	14		-0.0044	0		0.58
1982-03-06	6.6	8.9	2.8	7	7.1	5.2	7.4	7	8.4				5.5		27.7776	6		0.0003	0		1.31
1982-03-07	4.2	9	-0.6	4.5	4.5	4.8	7	7.2	8.4				0.5		153.934	46		0.013	0		1.14
1982-03-08	3.3	6.8	0	3.4	3.2	4.3	6.7	7.3	8.5				0		153.934	44		0.0157	0		1.1
1982-03-09																0		0	0		0.59
1982-03-10	5.4	12.1	0	5.8	6	4.5	4.9	4.6							168.98	48		0.0159	0		0.89
1982-03-11	7.7	17.6	-0.8	9.1	9.6	6.1	7.8	7.5	8.7				0		195.601	51		0.0172	0		0.88
1982-03-12	10.1	14.5	2.6	10.2	10.4	7.7	8.7	7.6	8.7				0		109.953	19		0.008	4		1.23
1982-03-13	10.3	15.8	6.4	10.4	10.5	8.9	10	7.9	8.7				6.5		181.712	41		0.0121	5		1.47
1982-03-14	7.5	11.2	3.7	7.5	7.5	6.8	9.2	8.3	8.8				0		208.332	52		0.0134	4		1.87
1982-03-15	9.5	14.5	6.2	9.5	9.3	7.5	9.1	8.5	8.9				0.5		40.509	12		0.0032	4		0.87
1982-03-16	13.5	21.8	8.7	13.6	13.6	11.3	11.3	8.6	9				2		163.193	49		-0.0007	5		1.09
1982-03-17	8.8	13.4	4.2	9.2	9.3	8.4	10.8	9	9.1				0.5		136.573	43		0.0124	4		1.94
1982-03-18	7.1	14.4	1.9	7.4	7.3	7.7	10.2	9.3	9.2				1		149.305	40		0.0088	4		0.67
1982-03-19		11.2		4.6	4.9	5	7.5	7.8	7.8				0		185.184	42		0.02	4		0.95
1982-03-20	7.3	8.8	5.7	7.4	7.2	6.7	9.1	9.3	9.4				1		27.7776	5		0.0008	2		0.4284
1982-03-21	9.7	12.4	7.2	9.8	9.8	7.5	9.6	9.3	9.5				17.5		41.6664	11		0.0041	1		1.1152
1982-03-22	11.1	17.5	5.6	11.5	11.5	8	10.3	9.3	9.5				0		231.48	54		0.0173	-3		1.53
1982-03-23	10.5	18	2.4	10.8	11	8.5	10.8	9.5	9.6				0		214.119	59		0.0098	5		1.37
1982-03-24	10.5	17.6	4.9	10.6	10.8	8.8	11.3	9.7	9.7				0		146.99	50		0.015	5		1.28
1982-03-25	6.6	11.2	1.8	6.7	6.4	6.2	10.5	10	9.8				0		207.175	57		0.0282	4		1.68
1982-03-26	5	11.1	-1.7	5.5	5.3	5.5	9.4	10	9.9				0		246.526	60		0.0279	4		1.59
1982-03-27	5.4	12.9	-1	5.5	5.4	6.2	9.6	9.8	9.9				0		230.323	50		0.0268	4		1.29
1982-03-28	6.4	11	2	6.4	6.3	5.9	9.8	9.7	10				0		226.85	53		0.0207	4		2.11
1982-03-29	6.1	13.5	-2.7	6.6	6.7	6.6	9.7	9.8	10.1				0		243.054	40		0.0292	5		0.96
1982-03-30	9.9	18.6	-1.3	10.7	10.9	8.5	10.5	9.8	10.1				1		222.221	38		0.0205	5		1.25
1982-03-31	12.1	16.8	6.8	12.9	13.1	8.1	10.9	9.9	10.2				5			6		0.0032	5		1.77
1982-04-01	9	16	2.5	9.6	9.8	8	10.9	10.1	10.2				0			71		0.0219	5		1.73
1982-04-02	8.4	11.3	5.4	8.2	7.9	6.9	10.3	10.2	10.2				0		53.2404	21		0.01	4		1.41
1982-04-03	12.3	21.9	5.8	12.3	12.2	10.1	11.6	10.3	10.3				3		77.5458	39			5		1.12
1982-04-04	6.3	10.7	-0.4	6.7	6.5	6.6	10.9	10.5	10.4				1.5			24			4		1.19
1982-04-05	6.4	14.1	-1.9	7.3	7.4	7.1	10.2	10.5	10.4				0			56		0.0699	5		1
1982-04-06	9.7	18	-0.3	10.6		9	11	10.4	10.5				0		202.545	67		0.0234	5		1.37
1982-04-07	12.5	14.6	9.7	12.5		10.2	12.1	10.5	10.6				3.5		69.444	27		0.0078	5		0.92
1982-04-08	12.9	13.8	9.8	12.9		10.7	12.9	10.8	10.6				2		40.509	18		0.0075	6		1.12
1982-04-09	13.4	19.3	10.1	13.5		11.2	13	11	10.7				1		113.425	41		0.0057	6		2.05
1982-04-10	9.1	13.4	5.1	9.1	8.8	8.1	11.9	11.3	10.7				0.5		172.453	43		0.0373	5		3.72
1982-04-11	8.3	17.1	-1	9.4	9.6	8.8	11.3	11.2	10.8				0		274.304	66		0.0297	5		1.17
1982-04-12	10.1	16.9		10.5	10.7	9.4	11.6	11.1	10.9				0		188.656	44		0.019	5		1.11
1982-04-13	13.2	16.7	9.9	13.6	13.6	10.3	12.3	11.1	11				0		92.592	23		0.0063	6		0.95
1982-04-14	14	18.1	8.7	14.1	14.3	11.9	13	11.3	11.1				4		129.629	45		0.007	6		1.39
1982-04-15	14.1	16.1	11.2	14.1	14	12.1	13.9	11.5	11.2				53		43.9812	18		0.004	6		2.1
1982-04-16	15.9	23.2	9.9	16.1	16.3	14.4	15	12	11.6				0		271.989	94		0.0226	7		1.5
1982-04-17	10.9															14		0.0058	2		0.49
1982-04-18	11.2															0		0	0		1.4788
1982-04-19	10.8	19		8.2	8.2											41		0.0189	4		0.62
1982-04-20	13.3	21.4	3.4	14.3	14.6	12.9	14.5	12.6	11.8	2.1	2.4	2.7	0		260.415	83		0.0207	6		1.69
1982-04-21	13	15.7	10.1	13.2	13.3	11.4	14.3	12.7	11.8	4.2	4.6	4.9	1.5		119.212	37		0.0062	6		2.47
1982-04-22	9.6	13.2	4.2	9.8	9.8	9.3	12.9	12.8	11.9	3.7	4	4.3	18		115.74	37		0.0128	6		2.03
1982-04-23	10.3	17.4	1.4	10.6	10.7	11	12.9	12.6	12	3.2	3.2	3.1	0		277.776	105		0.0239	6		1.56
1982-04-24	14.5	19.9	10.1	14.5	14.4	13.6	14.6	12.6	12.1	7.6	7.8	7.6	0		162.036	56		0.0196	7		1.04
1982-04-25	16.3	23.1	9.7	16.7	16.7	15.2	15.9	12.8	12.1	8.8	8.9	8.7	0		244.211	78		0.0211	8		1.16
1982-04-26	16.9	24.1	11.8	17	17	16	16.9	13.2	12.1	8.9	9	8.9	0		246.526	81		0.0214	8		1.25
1982-04-27	13.4	17.9	10.3	13.5	13.4	13.4	16.3	13.6	12.2	5.2	5.7	5.6	0		239.582	92		0.0118	7		2.84
1982-04-28	12.1	13.4	11.1	12	11.7	11.5	14.7	13.9	12.3	7.4	7.8	7.4	0		33.5646	11		0.0028	6		1.67
1982-04-29	16	19.1	12.3	16	15.7	13.7	15	13.8	12.5	10.5	10.7	10.5	0		75.231	30		0.0048	6		1.24
1982-04-30	18.8	24.8	14.3	18.7	18.6	17.5	17.3	13.8	12.5	12.9	13.1	13	0.5		204.86	94		0.0147	7		1.95
1982-05-01	19.7	23.4	17.5	19.7	19.7	17.7	18.3	14.2	12.7	15	15.1	15.2	4.5		122.684	52		0.0084	8		1.78
1982-05-02	20.2	23.8	16.9	20.1	20	17.6	18.3	14.6	12.8	15.9	16	15.9	0		106.481	40		0.0049	9		1.31
1982-05-03	21.6	25.8	18.8	21.5	21.3	19.6	19.6	15	12.9	17.5	17.5	17.6	8.5		129.629	65		0.0069	10		1.87
1982-05-04	21.7	27.5	14.7	21.6	21.6	19.6	20.6	15.4	13	13.2	13.3	13.6	1		239.582	101		0.0124	10		2.86
1982-05-05	17.4	24.1	11.5	17.5	17.6	17.7	19.5	15.9	13.2	6.8	7.1	7.3	0		265.045	82		0.0242	9		1.18
1982-05-06	17.5	23.9	9.4	17.8	17.9	16.8	18.7	16.2	13.4	9.6	9.7	9.5	0		177.082	61		0.0174	9		1.74
1982-05-07	17.5	21	15.4	17.7	17.6	17	18.8	16.3	13.6	14.1	14.2	14	16.5		105.323	45		0.0114	10		0.93
1982-05-08	19.9	26.6	14.3	20		15.9	19.5	16.3	13.8	13	13.1	12.9	0		265.045	114		0.0192	11		1.1
1982-05-09	20.5	26.3	16.2	20.6		15.5	20.5	16.5	13.9	14.2	14.3	14.1	0		215.276	83		0.0212	11		0.87
1982-05-10	20.4	26.3	14.4	20.7		15.8	20.5	16.9	14.1	14.5	14.7	14.4	0		210.647	80		0.0149	10		1.12
1982-05-11	21.1	26.7	16.6	21.1		16.8	21.2	17.1	14.2	16.3	16.1	16.2	0		240.739	97			9		1.18
1982-05-12	22.2	28.1	18.1	22.2		17.7	21.8	17.5	14.4	16.8	16.6	16.9	0		212.962	87			10		1.15
1982-05-13	21.9	25.7	17.6	22.3		20.5	22.1	17.8	14.6	15.6	15.6	15.9	0		246.526	100			9		1.68
1982-05-14	18.8	27.4	10.7	19.1	18.9	20.5	21.3	18.1	14.8	13.1	13.6	14	15		82.1754	22		0.0438	8		2.12
1982-05-15	14.5	19.6	9.4	14.9	14.8	18.4	19.3	18.2	15	2.9	3.3	4.3	0		265.045	97		0.0245	9		0.87
1982-05-16	15.2	22	6.8	15.8	16.2	18.3	18.8	18	15.1	6.3	6.8	7	0		265.045	96		0.0243	9		0.91
1982-05-17	18.3	24.6	11.8	18.7	18.8	20.1	19.8	17.9	15.3	9.6	9.8	10.3	0		283.563	99		0.0244	9		0.99
1982-05-18	19.4	25.9	12.3	20	20.2	20.3	20.2	17.9	15.4	11.6	11.7	11.8	0		231.48	93		0.0174	9		0.93
1982-05-19	17.2	20.7	14.7	17.1	17	19.9	20.5	18	15.5	8	8.6	8.9	0		271.989	102		0.013	8		2.42
1982-05-20	14.6	17.1	12.1	14.6	14.5	17.3	18.7	18.2	15.6	11.3	11.5	11.6	27.5		54.3978	18		0.0121	8		1.13
1982-05-21	16.9	23.2	10.4	17.5	17.6	19.4	19.2	18	15.9	7.2	7.5	7.9	0		273.146	109		0.0255	10		1.18
1982-05-22	16.3	22.7	8.9	16.9	16.9	18.9	19.3	17.9	15.9	4.3	4.8	5.6	0		295.137	101		0.0268	9		1.08
1982-05-23	15.7	23.3	6.8	16.4	16.7	19	19.2	17.8	15.9	4.3	4.8	5.6	0		311.341	102		0.0275	9		0.93
1982-05-24	18.9	25.8	11.6	19.1	19.2	20.8	20.2	17.8	16	9.5	9.6	10.1	0		284.72	96			9		1.4
1982-05-25	20.1	25.6	14.8	20.2	20.1	21.9	21.1	18	16	12	12.1	12.4	0		276.619	100		0.0416	9		1.58
1982-05-26	20.2	26	14.1	20.5	20.4	22.4	21.6	18.2	16	12.8	12.8	13.1	0		275.461	107		0.0143	8		1.39
1982-05-27	21.9	27.2	16.6	22	21.9	23.3	22.3	18.5	16.1	13.9	13.8	14.3	0		256.943	98		0.0187	8		1.03
1982-05-28	22.1	27.8	16.3	22.5	22.4	23.6	22.6	18.8	16.2	15.9	15.9	15.9	0		247.684	101		0.0114	8		1.23
1982-05-29	22.7	29	17	23.1	23.1	24.4	23.2	19.1	16.2	16	16.1	16.3	0		253.471	103		0.0159	8		1.17
1982-05-30	21	26.6	17.7	21.1	21.1	23.3	23.1	19.4	16.4	12.9	13.3	13.6	0		208.332	85		0.0126	7		1.99
1982-05-31	17.2	19.3	14.7	17.2	17	19.5	21	19.6	16.5	11.8	12.2	12.1	2.5		46.296	17		0.0051	2		2.07
1982-06-01	17.1	19.4	14.6	17	16.7	18.8	19.6	19.4	16.6	14.3	14.5	14.4	22		53.2404	26		0.0189	10		0.7
1982-06-02	17.1	19.4	15.1	17.2	17.2	18.8	19.6	19.1	16.8	13.5	14.2	14	0		65.9718	35		0.0037	10		1.86
1982-06-03	17.6	24.4	14.2	17.9	18	18.1	18.7	18.9	17.1	14.5	15.2	15.3	31		34.722	21		-0.0031	9		2
1982-06-04	16.1	18	14.8	16.3	16.1	17.5	18.4	18.7	17.8	12.7	13.2	13.5	7		56.7126	25		0.0026	5		0.74
1982-06-05	20.3	26.3	16	20.3	20.2	20.6	19.8	18.5	17.6	14.2	14.6	15.1	0		237.267	114		0.0173	7		0.91
1982-06-06	20.1	24.2	16.5	20.2	20.3	20.5	20.5	18.6	17.5	14.2	14.6	15	0		204.86	86		0.0076	7		1.41
1982-06-07	20	23.3	16.4	20.1	20	20.6	20.4	18.8	17.4	15.9	16	16.1	0		105.323	38		0.0076	7		0.61
1982-06-08	22.1	28.2	17.5	22.4	22.4	22.5	21.7	19	17.3	14.4	14.9	15.2	0		256.943	115		0.0133	9		1.24
1982-06-09	20.7	26.7	16	21	21	22.6	22.2	19.2	17.3	14.3	14.9	15	1.5		225.693	94		0.0145	8		1.02
1982-06-10	20.5	26	14.2	20.7	20.7	22.7	22.3	19.4	17.3	14.9	15.2	15.1	0		259.258	112		0.0192	8		1.07
1982-06-11	22.5	27.7	18.8	22.4	22.3	23.5	22.8	19.6	17.4	16.7	16.9	17	0		212.962	96		0.0208	8		0.87
1982-06-12	22.8	28.5	17.4	23.4	23.4	23.8	23.4	19.9	17.4	14	14.3	14.5	0		265.045	108		0.0156	8		0.95
1982-06-13	21.4	27.5	16.5	22.1	22.3	22.5	22.7	20.1	17.5	13.4	13.9	13.9	0		174.767	72		0.0081	8		1.51
1982-06-14	15.9	18.6	15	16	15.8	18.7	20.6	20.2	17.6	12.4	13.2	13.2	26		52.083	25		-0.0101	9		1.49
1982-06-15	19.3	24.9	14.9	19.7	19.6	21.8	21.1	19.9	17.7	9.6	10.1	10.7	0.5		312.498	133			12		0.72
1982-06-16	20.1	26.6	12.6	20.9	21	21.5	21.4	19.8	17.8	12	12.4	12.4	0		274.304	111		0.0134	11		1.55
1982-06-17	20.3	25.4	16.6	20.5	20.4	20.6	21	19.9	17.9	14.6	14.8	15.1	0		187.499	72		0.007	11		1.1
1982-06-18	20	23.5	17.2	20	19.9	20.8	21.1	19.9	17.9	14	14	14.6	0		150.462	62		0.0052	4		1.45
1982-06-19	20.8	24.7	16.3	20.8	20.6	22.8	21.8	19.9	17.9	16.3	16	16.5	10.5		199.073	95		0.0192	5		0.99
1982-06-20	21.3	26.5	17.4	21.3	21.2	23.4	22.7	20	18	17	16.9	17.6	43.5		200.23	100		0.021	5		0.91
1982-06-21	20.6	25	18.1	20.6	20.5	22.3	22.4	20.3	19.1	16.4	16.3	17.2	2.5		192.128	92		0.0111	1		1.32
1982-06-22	19.6	24.3	15.4	19.9	19.8	22.6	22.7	20.5	19	13.1	13	13.9	0		299.767	127		0.0168	0		1.48
1982-06-23	18.6	22.4	15.6	18.6	18.4	20.7	21.4	20.6	18.9	14.3	14.2	14.7	0.5		107.638	40		0.009	-2		0.83
1982-06-24	17	17.8	15.6	17.2	17.1	19.1	20.4	20.5	18.8	12.9	13.6	14.1	6		69.444	36		0.0064	-7		2.04
1982-06-25	19.9	24.6	17.6	20	20	21.4	21.1	20.2	18.8	13.3	13.1	13.8	0		148.147	75		0.0107	3		1.4
1982-06-26	17.3	18.2	15.5	17.5	17.3	18.5	20	20.1	18.7	12.4	12.4	12.8	3		35.8794	9		0.0001	-8		1.74
1982-06-27	18.1	25.8	13.9	18.8	18.8	18.7	19.1	19.8	19.1	10.2	10.8	11.9	29.5		209.489	102		0.0226	2		1.74
1982-06-28	19.7	25.7	14.8	19.8	19.7	22.3	21.2	19.6	19.2	12.6	12.8	13.8	4			120		0.0161	7		1.13
1982-06-29	20.2	25.6	15.3	20.3	20.1	22.7	22.1	19.7	19	11.2	11.3	12.2	0		297.452	138		0.0215	4		1.12
1982-06-30	17.3	20.2	15.2	17.3	17.2	19.5	20.9	20	18.9	9.8	10.1	10.6	0		185.184	83		0.0099	-6		1.82
1982-07-01	18	23.4	14.8	18.2	17.8	20.9	21	20	18.8	10.6	10.7	11.3	0			121		0.0151	1		1.69
1982-07-02	17.7	21.4	15.2	18	17.6	20	20.7	19.9	18.7	11.2	11.2	11.8	0		167.823	67		0.0111	-3		1.34
1982-07-03	18.7	23.8	13.4	19.2	18.8	22.1	21.3	19.8	18.7	11.7	11.7	12.4	0		261.572	105		0.0183	3		1.35
1982-07-04	17.8	20.9	12.3	18.5	18.2	20	20.6	19.8	18.7	13.8	13.7	13.8	0		111.11	50		0.009	-2		1.21
1982-07-05	21.7	26.4	16.8	22.4	22	23.5	22	19.8	18.6	15.8	15.5	16.1	0		207.175	91		0.0172	7		0.79
1982-07-06	21.1	25.4	16.1	22.2	21.8	22.6	22	19.9	18.6	16	15.6	16	0		157.406	68		0.0091	3		0.92
1982-07-07	19.7	21.9	17.7	20.2	19.8	21.3	21.7	20	18.6	17	17	17.6	22.5		60.1848	28		0.0043	-2		1.22
1982-07-08	20.5	24.9	15.7	20.9	20.6	22.7	21.9	20.1	18.6	15.5	15.1	15.8	0		226.85	112		0.0182	5		1.1
1982-07-09	22.3	27	18.7	22.7	22.2	24.2	23	20.2	18.6	16.5	16.1	17	0		193.286	92		0.0182	7		0.69
1982-07-10	23.9	28.9	18.8	24.4	23.9	25.1	23.8	20.4	18.6	18.2	17.7	18.3	0		233.795	115		0.0223	7		0.75
1982-07-11	24.1	28.6	20.1	24.6	24	24.6	24	20.7	18.6	19.2	18.8	19.4	0		185.184	89		0.0129	4		1.38
1982-07-12	26	30.2	22.9	26.9	26.3	25.9	24.6	20.9	18.7	20.9	20.8	21.7	0.5		162.036	79		0.0156	6		1.22
1982-07-13	22.6	27.1	18	24	23.8	23.9	24.1	21.2	18.7	15.9	15.9	17	0		122.684	42		0.0041	-3		0.76
1982-07-14	21.6	27.3	16.5	22.4	22.1	24.3	23.8	21.3	18.8	14.2	14.3	15.1	0		196.758	81		0.0085	0		1.17
1982-07-15	21	25.4	18.4	21.3	20.9	23	23.4	21.3	18.9	15	15.3	15.8	0.5		245.369	113		0.0079	0		1.88
1982-07-16	20.1	22.6	18	20.5	20	22.1	22.6	21.3	19	15	14.9	15.3	0		107.638	43		0.0043	-1		0.99
1982-07-17	20.6	23.5	18.6	20.9	20.4	21.8	22.1	21.2	19.1	18.3	18.3	18.7	18.5		56.7126	29		0.0132	0		0.94
1982-07-18	23.4	28.4	18.8	23.9	23.4	24.5	23.4	21.1	19.1	19.1	18.7	19.3	0		192.128	96		0.0135	7		0.93
1982-07-19	21.9	23.6	20.8	22.3	21.7	23	23.2	21.2	19.1	19.2	19.1	19.5	4.5		59.0274	26		0.0079	-1		1.12
1982-07-20	22.6	27.2	20.6	23	22.5	24	23.5	21.3	19.2	18.7	18.5	19.2	1		136.573	69		0.0071	3		1.06
1982-07-21	21.1	22.8	19.9	21.4	21	22.1	22.7	21.4	19.2	17.1	17.1	17.5	0		67.1292	28		0.0017	-3		1.41
1982-07-22	21.8	26.5	18.5	22.2	21.8	23.6	23.2	21.3	19.3	16.9	16.8	17.5	1		211.804	99		0.0141	3		1.08
1982-07-23	22.1	27	17.3	22.6	22.2	23.4	23.3	21.3	19.3	16.4	16.3	16.9	0		218.749	100		0.0121	3		1.1
1982-07-24	22.6	26.9	20	23.1	22.6	24	23.6	21.4	19.3	17.6	17.5	18	1.5		166.666	75		0.006	2		1.31
1982-07-25	20.6	21.6	20.1	21	20.5	22.2	22.8	21.5	19.4	18	18.1	18.7	11		48.6108	24		0.0089	-2		1.08
1982-07-26	20.9	21.7	20.3	21.2	20.7	21.8	22.2	21.5	20	18.1	18.2	18.8	35.5		60.1848	33		0.0121	-1		1.78
1982-07-27	21.4	23.4	19.6	21.7	21.2	22.3	22.4	21.4	20.3	17	16.8	17.3	0		106.481	55		0.0074	0		1.49
1982-07-28	21.6	25.2	18.7	21.9	21.4	22.8	22.5	21.4	20.2	17.4	17.1	17.6	0		119.212	59		0.0112	2		0.91
1982-07-29	21.5	24.3	20.1	21.8	21.3	22.5	22.6	21.4	20.1	18.2	18.3	18.8	1		87.9624	44		0.0034	1		1.29
1982-07-30	22.2	24.9	20.1	22.5	21.9	22.8	22.7	21.4	20	19.8	19.7	20.2	20.5		63.657	31		0.0028	2		0.93
1982-07-31	23.5	27.2	21.7	23.9	23.4	24.2	23.6	21.4	20.5	20.5	20.4	21.1	2.5		168.98	91		0.0101	4		1.57
1982-08-01	23.1	25.1	21.3	23.9	23.4	23	23.3	21.6	20.5	20.6	20.8	21.4	25		39.3516	20		-0.0073	1		1.72
1982-08-02	27	30.4	24.9	27.8	27.1	25.6	24.8	21.8	21.1	21	20.9	21.5	16		246.526	120		-0.008	7
1982-08-03	24.5	25.1	24.1	25.4	25	24.1	24.5	22.1	21	21.9	21.8	22.2	23.5		37.0368	21		-0.0064	1		1.12
1982-08-04	26.4	31.9	22.7	26.8	26.3	26.6	25.8	22.3	21.2	20.9	20.7	21.2	0		241.897	138		0.0245	7		1.15
1982-08-05	25	29.7	21.4	25.6	25.2	25.9	25.9	22.6	21	18.8	18.7	19.1	0		222.221	115		0.0184	2		0.73
1982-08-06	24.7	30.4	19.8	25.5	25.2	25.8	25.7	22.8	20.9	19.3	19.3	19.5	0		221.063	105		0.0176	2		0.88
1982-08-07	23.4	26.9	21.5	23.9	23.5	24.3	25	22.9	20.8	19.2	19.4	19.5	5.5		146.99	76		0.0057	-1		1.45
1982-08-08	24.2	27.9	21.7	24.7	24.1	24.7	24.8	22.9	20.8	21.4	21.4	21.6	1		114.583	60		0.0096	3		0.75
1982-08-09	25.4	29.8	23.1	26	25.5	25.9	25.7	22.9	20.8	20.9	20.7	20.8	0		192.128	99		0.0115	4		0.86
1982-08-10	25.5	30.8	21.1	26.2	25.8	26.3	26	23	20.8	20.6	20.5	20.5	0		219.906	115		0.0051	2		0.96
1982-08-11	25.7	31.7	21.1	26.4	26	26.7	26.3	23.2	20.8	19.8	19.9	20.1	0		225.693	116		-0.0334	1		1.25
1982-08-12	23.2	25.8	21	23.6	23.2	24.6	25.3	23.3	20.8	18.6	18.9	19	0		149.305	82		0.0115	-4		1.93
1982-08-13	23.7	27.8	20.3	23.9	23.4	24.8	24.9	23.3	20.8	19.1	19	19.1	0		162.036	88		0.0163	1		0.99
1982-08-14	25.9	31.9	21	26.7	26.3	26.6	25.9	23.2	20.9	21.1	20.8	20.9	0		207.175	112		-0.0269	4		0.73
1982-08-15	25.2	29.7	22.2	26.1	25.6	25.9	25.9	23.3	20.9	21.3	21.1	21.1	0		119.212	55		0.0096	0		0.55
1982-08-16	23.5	25.6	21.8	24.1	23.7	24.4	25	23.3	20.9	20	20.2	20.2	0.5		61.3422	24		-0.0017	-2		0.8
1982-08-17	24.8	28.1	22.4	25.4	25	25.4	25.2	23.3	21	21.2	21.5	21.9	6		120.37	67		-0.0313	2		1.35
1982-08-18	25.8	29.9	23.3	26.3	25.9	25.8	25.7	23.3	21	21	21.1	21.4	0		175.925	91		-0.0259	3		1.25
1982-08-19	25.8	29.4	22.3	26.3	25.8	26.6	26	23.3	21	21.4	21.3	21.4	0			87		-0.0237	3		0.94
1982-08-20	26.4	30.8	23.1	27	26.4	27.1	26.5	23.4	21.1	21.7	21.6	21.8	0		181.712	90			3		1.09
1982-08-21	26.4	30.9	23.4	26.9	26.3	26.7	26.4	23.6	21.1	22.1	21.9	22	0		163.193	83		-0.0268	3		0.88
1982-08-22	27.1	32.4	23	27.8	27.3	27.9	27.2	23.7	21.1	22.3	22.1	22.3	0		222.221	113			4		1.17
1982-08-23	25.8	30.7	22.3	26.4	26	27.2	27	23.9	21.2	21.4	21.6	21.7	0		211.804	109		-0.0264	-1		1.38
1982-08-24	27.1	32.3	23.1	27.6	27.1	28.3	27.4	23.9	21.2	21.5	21.4	21.7	0		234.952	113		-0.0104	4		1.24
1982-08-25	26.7	31.9	23.7	27.2	26.7	27.5	27.1	24	21.3	21.9	21.9	22	0		165.508	83		-0.0001	4		0.93
1982-08-26	24.5	28.8	23	24.9	24.4	25.6	26.3	24.1	21.4	21.1	21.6	21.8	7		105.323	56		-0.0033	-1		1.54
1982-08-27	26.4	31.1	22.9	27.2	26.7	25.4	26.1	24.1	21.4	21.2	21.4	21.8	3.5		200.23	107			4		1.79
1982-08-28	27.6	31.7	24.4	28.3	28	26.8	26.9	24.1	21.5	22.5	22.4	22.9	1.5		212.962	112		-0.021	4		1.67
1982-08-29	27.4	31.9	24	28	27.6	27.4	27.4	24.1	21.5	22.6	22.5	22.8	0		215.276	108		-0.011	3		1.21
1982-08-30	25	26.9	23.3	25.7	25.4	25.3	26.5	24.3	21.6	22.1	22.1	22.2	0.5		67.1292	26		-0.0002	-2		0.65
1982-08-31	25.6	30.2	22.8	26.1	25.7	25.9	26.4	24.3	21.6	20.6	20.5	20.9	5		185.184	96		-0.0168	0		0.92
1982-09-01	25.3	29.9	21.2	25.8	25.4	25.5	26.3	24.2	21.6	18.9	18.9	19.2	0		251.156	122		-0.008	-2		1.14
1982-09-02	24.1	28.5	19	24.9	24.6	25.1	25.9	24.1	21.7	19.6	19.5	19.5	0		225.693	110		-0.0083	-2		1.08
1982-09-03	23.5	28.7	20.3	24	23.6	25.1	25.8	23.9	21.7	18.5	18.4	18.5	0		142.36	69		-0.0037	-3		1.1
1982-09-04	19.6	22.6	16.9	20	19.6	20.7	23.5	23.8	21.8	13.1	13.5	13.6	11		101.851	31		-0.0212	-11		2.23
1982-09-05	19.8	25.8	15.1	20.5	20.2	21.1	22.7	23.4	21.8	10.1	10.2	10.7	0		256.943	99			-4		1.43
1982-09-06	19.4	21.5	17.5	19.8	19.1	20.3	21.9	22.9	21.7	14.3	14.2	14.4	0.5		69.444	32		-0.009	-4		0.7
1982-09-07			18.6	21.6	20.6	22	22.5	22.6	21.7	17.8	17.5	17.9	0		105.323	56		-0.011	2		0.61
1982-09-08	22.1	24.7	20.6	22.4	21.5	22.4	23	22.5	21.6	18	17.9	18.2	0.5		100.694	53		-0.0168	0		0.83
1982-09-09	22.6	27.1	20	23.1	22.3	22.5	23.1	22.5	21.5	18.6	18.7	19	0		158.564	81		-0.0115	1		1.5
1982-09-10	23	26.9	20.4	23.5	22.8	22.9	23.5	22.5	21.5	20.2	20	20.3	37		46.296	17		0.0017	0		1.02
1982-09-11	20.2	21.7	18.8	20.6	20.2	21.1	22.5	22.6	21.5	17.6	17.8	18	21		40.509	19		0.0047	-4		1.07
1982-09-12	20.5	24.6	18.3	21.1	20.7	19.8	21.1	22.3	21.8	16.6	16.9	17.3	133.5		19.6758	6			-3		2.47
1982-09-13	23.4	28.1	17.7	24.4	24.1	21.9	22.2	21.8	21.6	13	13	13.9	0		238.424	108			0		1.46
1982-09-14	20.5	25.9	14.4	21.3	21.1	20.7	21.9	21.7	21.6	13.1	13.2	13.4	0		221.063	96		-0.011	-4		1.14
1982-09-15	17.2	19.1	15	18	17.8	18.3	20.6	21.6	21.6	13	13.2	13.1	6		34.722	1		0	-8		0.89
1982-09-16	18.5	22.5	14.3	18.9	18.5	19.2	20.3	21.4	21.5	13.1	12.9	13.1	0.5		113.425	43		0	-2		0.63
1982-09-17	19.7	24.3	16.7	20.2	19.8	19.6	20.7	21.2	21.4	14.4	14.3	14.4	0		144.675	60		0	-1		0.83
1982-09-18	19	23.6	14.8	19.7	19.4	19.7	20.9	21.1	21.3	13.7	13.5	13.5	0		165.508	66		0	-3		0.78
1982-09-19	17.9	20.4	15.5	18.5	18.2	18.7	20.2	21	21.1	13.5	13.3	13.6	1		69.444	24		0	-3		0.45
1982-09-20	18	20	15.6	18.3	17.7	18.7	20	20.8	21.1	15.3	15.2	15.5	21		54.3978	26		0	-1		0.54
1982-09-21	21.3	27.4	16.4	22	21.5	20.7	21	20.7	21	17.3	17.1	17.4	0.5		114.583	47		0	2		0.56
1982-09-22	18.7	24.3	13.2	19.7	19.6	19.3	20.8	20.7	20.9	10.8	11.1	11.5	0		184.027	78		0	-5		0.69
1982-09-23	17.7	18.5								8.6	8.4	8.6			4.6296	-4		0	-4		0.53
1982-09-24	18.5	19.6								8.8	8.9	9	9.5			-3		0	-3		0.79
1982-09-25	21	23.6	18.9	21.5	21.1	19.8	20.3	20.3	20.6	18.3	18.6	18.4	38		32.4072	12		0	2		1.59
1982-09-26	24.6	27.1								13.5	13.3	13.3				-13		0	0		1.2
1982-09-27	23.4	29.3	18.3	24.5	24.3	22.1	22.5	20.5	20.4	16.8	16.8	16.9	0		187.499	77		0	0		0.7
1982-09-28	20	21.5	18.3	20.6	20.3	19.8	21.4	20.7	20.4	13.7	14.2	13.9	0		67.1292	25		0	-5		1.1
1982-09-29	19.1	22.9	14.6	19.7	19.4	19.2	20.6	20.7	20.4	12.2	12.8	12.6	0		111.11	44		0	-4		0.64
1982-09-30	17.7	20.8	14.2	18.5	18.2	18.6	20	20.6	20.3	13	13.4	13.1	0		62.4996	17		0	-5		0.33
1982-10-01	18	23.9	13.8	18.9	18.8	17.9	19.6	20.4	20.3	12.5	12.7	12.4	0		137.731	55		0	-5		0.53
1982-10-02	16.4	22.1	12.4	17.1	17	16.9	18.8	20.2	20.3	12.9	12.9	12.7	25		72.9162	35		0	-5		0.8
1982-10-03	17.5	22.6	13.6	18.1	17.9	18.1	19.1	19.9	20.3	10.9	11	11.4	0.5		157.406	70		0	-3		0.82
1982-10-04	17.6	24.2	11.2	18.2	18.2	17.6	18.9	19.7	20.2	11.4	11.2	11.4	0		193.286	82		0	-3		0.75
1982-10-05	18.8	22.8	15.1	19.3	19	18.6	19.4	19.5	20.1	13.6	13.5	13.8	0		122.684	49		0	0		0.78
1982-10-06	16.7	18.3	15.5	17.2	16.9	17.4	19	19.5	20	13.6	13.6	13.9	4		24.3054	0		0	-5		0.57
1982-10-07	17	19.5	14.7	17.4	16.9	17.4	18.6	19.4	19.9	12.4	12.2	12.5	0.5		60.1848	27		0	-3		0.78
1982-10-08	16.4	17.2	15.6	16.8	16.5	16.9	18.3	19.3	19.8	13.4	13.4	13.7	33		16.2036	2		0	-4		1.14
1982-10-09	15.6	16.8	14.3	16.2	16	15.3	17.2	19	19.5	8.8	9.1	9.3	28		37.0368	9		0	-7		2.02
1982-10-10	14.5	19.1	11.3	14.9	14.7	15.3	16.8	18.7	19.2	7.3	7.3	7.5	0		111.11	38		0	-6		1.09
1982-10-11	14.2	16.6	11.2	14.5	14.3	15.1	16.4	18.4	19.3	10.6	10.7	11	5		47.4534	17		0	-3		0.79
1982-10-12	18	23.1	14.1	18.6	18.3	17.3	17.8	18.2	19.2	12.7	12.8	12.9	0.5		146.99	59		0	1		0.66
1982-10-13	18	24.7	12.5	19	18.9	17.5	18.2	18.1	19.2	13.4	13.1	12.8	0		167.823	61		0	-1		0.6
1982-10-14	17.9	24.7	12.2	19.1	19	17.4	18.4	18.2	19.1	13.5	13.2	12.8	0		156.249	60		0	-2		0.51
1982-10-15	17.9	24.4	11.7	19.5	19.6	17.2	18.1	18.2	19	13.6	13.3	12.8	0		136.573	53		0	-2		0.52
1982-10-16	17.8	23.7	11	18.3	18	17.4	18.5	18.2	19	11.2	11.1	11.3	0		93.7494	33		0	-2		0.85
1982-10-17	11.6	16.4	7.1	12.5	12.5	13.5	16.6	18.2	18.9	1.6	1.8	2.2	0		160.879	39		0	-14		1.31
1982-10-18	13.4	20	6.3	14.2	14.2	13.7	15.6	17.9	18.8	6.8	6.7	6.8	0		163.193	55		0	-6		0.55
1982-10-19	15.8	19.1	11	16.2	16	14.9	15.9	17.5	18.8	12.2	12.1	12.1	10.5		48.6108	21		0	1		0.85
1982-10-20	20	25.7	14.1	20.6	20.1	18.4	18.3	17.4	18.3	15.5	15.7	15.6	32.5		107.638	33		0	3		1.43
1982-10-21	15.7	22.4	10.3	16.9	16.9	15.6	17.4	17.6	18.2	9	9	8.8	0		166.666	58		0	-7		0.63
1982-10-22	14.1	21.6	8.5	15.3	15.4	14.2	16.4	17.5	18.2	5.9	6	6.2	0		170.138	57		0	-8		0.58
1982-10-23	13.7	22	6.7	14.7	14.7	13.4	15.4	17.3	18.2	5.7	5.6	5.7	0		165.508	55		0	-6		0.62
1982-10-24	15.1	19.8	9.1	15.8	15.6	14.2	15.5	17	18.2	9.8	9.5	9.5	0		71.7588	9		0	-1		0.95
1982-10-25	11.3	16.6	5.6	12.9	12.9	12.4	15.1	16.9	18.2	-3.3	-2.3	-1.1	0		168.98	35		0	-11		1.33
1982-10-26	9.8	18.2	2	11.3	11.6	10.9	13.7	16.6	18.1	-0.3	-0.1	0.3	0		165.508	33		0	-10		0.9
1982-10-27	10.3	19.5	2.6	12.6	13.1	10.5	12.9	16.2	18	3.5	3.5	3.6	0		155.092	51		0	-8		0.41
1982-10-28	13	20.9	3.5	13.9	13	11.5	13.2	15.8	17.9	8.1	7.9	7.5	0		141.203	50		-0.003	-2		0.55
1982-10-29	15.4	21	10.6	15.9	15.4	13.9	14.4	15.6	17.8	11.2	11.1	11	0		106.481	36		-0.001	2		0.91
1982-10-30	13.4	19		14	13.6	13.6	14.4	15.1	17.1	9.9	9.7	9.6	0		84.4902	29		0.008	-2		1.29
1982-10-31	14.6	20.7	9.4	15.2	14.7	14	14.9	15.7	17.5	10.7	10.3	10.2	0		118.055	47		0.0137	-2		0.62
1982-11-01	16.3	21.5	10.9	16.8	16	15.3	15.4	15.7	17.4	12.2	12	12.2	0		83.3328	37		0.0117	3		0.59
1982-11-02	13.3	16.3	6.8	13.9	13.3	13.9	15.5	15.8	17.3	3.4	3.5	4	0		94.9068	19		0	-7		1.1
1982-11-03	9.3	16.1	1.7	10.8	11	10.9	13.4	15.8	17.3	0.4	1	1.5	0		140.045	35		0.0233	-9		0.49
1982-11-04	13.2	18.7	8.9	14	13.4	13.3	13.9	15.5	17.2	7.7	7.6	7.9	0		109.953	44		0.0181	0		0.64
1982-11-05	14	15.6	11.6	14.6	14	13.8	14.5	15.4	17.2	11.3	11.3	11.5	17		23.148	7		0.023	0		0.52
1982-11-06	13.1	16.6	7.8	13.9	13.5	13.2	14.3	15.4	17.1	6.4	6.5	6.8	0		109.953	45		0.0075	-4		1.28
1982-11-07	11.9	12.6	11.2	12.3	11.7	12.8	14	15.4	16.9	8.5	8.6	8.9	29		16.2036	3		0.0516	-3		0.51
1982-11-08	14.2	19.1	10.6	14.7	14.1	13.9	14.4	15.1	16.5	9.6	9.6	9.7	0.5		114.583	42		0.0228	0		0.7
1982-11-09	14.7	16.4	13	15.1	14.2	14.4	14.8	15.1	16.5	11.6	11.5	11.6	3		35.8794	14		0.0051	1		0.63
1982-11-10	13.8	14.8	12.5	14.3	13.4	14.1	14.9	15.2	16.5	11.1	11.1	11.2	18.5		15.0462	6		0.0063	-2		1.55
1982-11-11	12.9	15.9	9.2	13.7	13.2	13.5	14.4	15.2	16.1	10.2	10.4	10	9		45.1386	20		0.0341	-2		0.94
1982-11-12	11.4	19.6	6.8	13.4	13.9	12.1	13.8	15.1	16.1	4.9	4.8	5	0		134.258	40		0.0164	-7		0.86
1982-11-13	11.6	18.4	4	12.8	13.1	11.1	12.7	14.9	16.2	5	5	4.8	0		128.471	36		0.0108	-5		0.7
1982-11-14	12.9	18.2	9.3	13.6	13.2	12.8	13.6	14.7	16.2	6.9	6.3	6.9	0		111.11	31		0.0164	-2		0.55
1982-11-15	11.8	16.8	7.5	12.7	12.6	12	13.1	14.6	16.2	7.3	6.6	7.3	0		56.7126	17		0.0082	-2		0.47
1982-11-16	14.4	18	11.2	15	14.7	13.5	13.8	14.5	16.2	9.2	8.7	9.5	0		65.9718	22		0.0059	2		0.88
1982-11-17	11.6	14.1	7.3	12.6	12.5	12.5	13.9	14.6	16.1	9.4	8.7	8.8	4.5		15.0462	1		-0.0072	-6		1.28
1982-11-18	11.9	15.8	6.4	12.4	12.1	12	12.9	14.6	16.1	8.4	7.7	8.3	0		63.657	24		0.0076	-1		0.46
1982-11-19	12.6	16.7	9.8	13.2	12.8	12.6	13.4	14.4	16	8.5	7.7	8.3	0		67.1292	43		0.0085	-2		0.51
1982-11-20	12.6	17.8	8.3	13.2	13.2	12.2	13.2	14.4	16	6.4	5.7	6.3	0		107.638	39		0.0084	-3		1.09
1982-11-21	11.7	15	8	12.4	12.3	11.9	13.1	14.4	15.9	4.8	4.1	4.8	0		61.3422	28		0.0048	-5		1.04
1982-11-22	11	15.1	6.4	11.3	11	11.6	12.6	14.3	15.9	7.2	6.4	7.1	0		61.3422	32		0.0104	-2		0.56
1982-11-23	13.6	17.9	11	13.9	13.7	12.9	13.5	14.2	15.9	6.9	6.3	6.9	0		67.1292	36		0.0035	0		1.22
1982-11-24	11.6	16.8	6.2	12	11.7	12	13.4	14.2	15.8	1.3	0.8	1.5	0		104.166	29		0.0194	-5		1.65
1982-11-25	6.3	11.4	0.8	7.2	7.2	8.1	11.3	14.2	15.8	-7.3	-7.7	-6.7	0		122.684	20		0.0184	-11		1.95
1982-11-26	3.9	12.6	-2.8	5.5	6	6.6	9.5	13.8	15.7	-4.5	-5.1	-4.4	0					0.0185	-12		0.89
1982-11-27	3.3	11.7	-2.9	5.3	6.1	6.8	9.1	13.3	15.7	-4.8	-5.2	-4.5	0		118.055			0.0131	-8		0.63
1982-11-28	1.3	9.6	-5.1	3.8	5.1	6.4	8.8	12.8	15.6	-6.4	-6.4	-5.6	0		118.055			0.0182	-9		0.47
1982-11-29	4.4	10.6	-3.1	5.2	5.7	6.7	8.4	12.3	15.4	-1.2	-1.8	-1.4	0		79.8606			0.0134	-4		0.7
1982-11-30	13.6	19	6.9	14.6	14.5	11.6	11	11.9	14.8	10.7	10.4	10.8	28.5		48.6108			0.0089	6		1.28
1982-12-01	9.7	16.5	4.5	11.9	12.3	10.1	11.3	12	14.4	4.8	4.3	4.4	0		93.7494			0.0047	-7		0.6
1982-12-02	8.8	16	1.1	10	10.2	8.1	9.8	12.1	14.4	1.9	1.4	2.1	0		109.953			0.0129	-7		0.88
1982-12-03	10.6	17.1	3.1	11.2	11.2	9.3	10.3	12	14.4	3.6	2.9	3.6	0		107.638			0.0046	-1		1.71
1982-12-04	10.5	15.4	6	11.5	11.3	10.1	11.1	11.9	14.4	4.4	3.7	3.9	0		97.2216			0.0097	-4		0.79
1982-12-05	11.8	19	4	12.5	12.6	9.9	10.6	12	14.3	6.7	6	6.3	0		85.6476			0.0007	1		2.74
1982-12-06	6	10.7	-2.2	6.6	6.5	8.5	10.7	12.1	14.3	-2.7	-3.1	-1.8	4		53.2404			0.0045	-15		0.93
1982-12-07	0.1	7	-3.9	2.1	2.7	3.9	7.2	12	14.3	-6.6	-6.9	-6	0		86.805	52		0.0088	-14		0.46
1982-12-08	2.2	11	-4.9	3.8	4.4	4	6.5	11.4	14.2	-4.2	-4.6	-3.9	0		113.425			0.0092	-9		0.67
1982-12-09	0.8	6.6	-2.1	2.4	3.1	3.5	6	10.9	14.1	-3.7	-4	-3.7	0		43.9812			0.0046	-10		0.56
1982-12-10	4	12.8	-2.2	5.1	5.9	3.8	5.8	10.4	14	-1.5	-2.3	-1.8	0		104.166			0.0083	-6		0.79
1982-12-11	8.1	18.9	-0.8	8.9	9.4	6.2	6.8	10.1	13.9	4.4	3.4	3.7	0		86.805			0.0047	3		1.48
1982-12-12	11.1	13.1	8	11.5	11.3	8.8	9	10	13.7	4.7	4.4	4.9	0		26.6202			-0.0038	2		1.56
1982-12-13	4.8	7.7	-1.6	5.9	6	6.3	8.2	10.2	13.5	-3.5	-3.8	-2.8	0		33.5646			0.0006	-10		0.69
1982-12-14	2.4	7	-2.3	3.1	3.1	4	6.2	10.2	13.4	-1.6	-2.3	-1.6	0		24.3054			0.0023	-8		0.57
1982-12-15	3.9	10.7	-1.7	5.7	6.2	4.6	6.4	9.9	13.3	0.3	-0.7	-1.2	0		100.694			0.0105	-7		0.58
1982-12-16	3.7	9.7	-1.1	4.6	5	4.4	6	9.7	13.2	-0.5	-1.2	-0.5	0		52.083			0.0046	-4		0.5
1982-12-17	4.3	7.4	-0.2	5.1	5.2	5.1	6.5	9.5	13.1	1	0.2	0.7	0		15.0462			0.0004	-6		0.49
1982-12-18	3.9	10.5	-1.7	5.1	5.7	3.8	5.8	9.4	12.9	-4.7	-5.3	-4.5	0		98.379			0.0065	-6		0.93
1982-12-19	1.7	7	-2.8	3.2	3.7	3.6	5.7	9.2	12.8	-5.3	-5.5	-4.7	0		67.1292			0.0062	-8		0.67
1982-12-20	0.7	9.4	-4.8	2.7	3.8	2.5	4.9	9	12.7	-4.2	-4.8	-4.6	0		105.323			0.0116	-7		0.59
1982-12-21	5	12.8	-4.1	5.7	5.7	3.5	5	8.7	12.5	-0.4	-1	-0.8	0		94.9068			0.0016	-2		1.23
1982-12-22	6.3	6.9	5.6	6.4	6.1	5.9	6.4	8.5	12.4	2.9	2.1	2.7	6		9.2592			0.0041	0		0.77
1982-12-23	6.3	14.1	2.6	7.4	7.5	6.1	7	8.6	12.3	1.4	1	1.7	0.5		68.2866			0.0051	-4		0.71
1982-12-24	4.5	14.2	-2.2	7.5	8	4.1	6	8.7	12.2	-3.3	-3.7	-2.8	0		97.2216			0.0063	-7		0.84
1982-12-25	5.3	11.4	-0.4	6.5	6.6	4.4	5.8	8.6	12	-3.3	-3.7	-2.9	0		93.7494			0.0033	-2		0.81
1982-12-26	3.5	5.8		3.7	3.5	4.4	5.8	8.1	11.4	-0.5	-1	-0.2	7.5		10.4166			0.0258	-4		0.85
1982-12-27	5.7	10.3	2.5	6.4	6.6	5.4	6.3	8.4	11.8	1.3	0.8	1.5	0		70.6014			0.0173	-2		0.64
1982-12-28	5.2	11.2		5.9	6.1	4.7	6.1	8.4	11.7	-1.6	-2.4	-1.8	0		106.481			0.0048	-5		1.07
1982-12-29	5.8	11.4	2.1	6.7	6.8	5.7	6.6	8.4	11.6	1.1	0.3	0.4	0		69.444			0.0079	-2		0.63
1982-12-30	4.1	11.7	-2.2	4.5	4.7	5	6.3	8.4	11.5	-0.8	-1.7	-1.1	0		93.7494			0.0134	-3		1.1
1982-12-31	2.3	8.4	-2.9	3.2	3.5	3.3	5.6	8.4	11.5	-7.1	-7.5	-6.6	0		108.796	53		0.0074	-10		1
1983-01-01	0.9	8.6	-5	2.2	2.5	2.7	4.9	8.2	11.4	-7.3	-7.7	-6.9	0		115.74	40		0.0098	-7		0.89
1983-01-02	-0.8	6.2	-7.3	1	1.6	1.9	4.2	8	11.4	-7.4	-7.9	-7.5	0		108.796	31		0.0107	-7		0.48
1983-01-03	-0.4	7.7	-6.3	1.4	2	1.8	4	7.7	11.3	-6.6	-7.2	-6.8	0		115.74	25		0.0122	-6		0.54
1983-01-04	0.8	7.3	-7.1	2.3	3.1	1.5	3.6	7.5	11.2	-6.9	-7.5	-7	0		118.055	37		0.0069	-6		0.67
1983-01-05	2.4	7.3	-2.1	3.3	3.3	2.6	3.9	7.2	11.1	-2.8	-3.5	-2.9	0		49.7682	51		0.0057	-3		0.66
1983-01-06	6.8	8.8	3.7	7	6.7	5	5.2	7.1	10.9	1.3	0.8	1.4	4		30.0924			-0.0015	2		1.52
1983-01-07	7	9.4	4.1	7.4	7	5.8	6.1	7.2	10.8	0.7	0.3	1.1	0.5		68.2866			0.0031	2		0.88
1983-01-08	6.6	9.1	5.2	7	6.7	6.5	6.9	7.4	10.7	3.9	3.4	3.9	1		21.9906			0.0032	0		0.75
1983-01-09	5.2	9.9	-0.1	6.2	6.2	5.2	6.6	7.7	10.7	-5.6	-5.8	-4.5	0		81.018			0.007	-6		0.91
1983-01-10	2	8.1	-2.6	2.5	2.5	3.3	5.4	7.8	10.6	-9	-9.3	-8.4	0		105.323	3		0.0127	-8		1.35
1983-01-11	1.2	7.6	-4.1	2.1	2.3	1.6	4.1	7.6	10.6	-11.8	-12.1	-11.3	0		118.055	-1		0.0108	-10		1.55
1983-01-12	1.1	10.6	-6	3.1	3.8	1.6	3.7	7.3	10.5	-7.9	-8.3	-7.4	0		114.583	12		0.0074	-6		0.64
1983-01-13	3	9.6	-2.6	3.8	3.8	2.8	4.1	7.1	10.5	-3.9	-4.5	-4.2	0		112.268	13		0.0109	-3		0.84
1983-01-14	1.2	7.6	-5	2.8	3.1	2	4	6.9	10.4	-9	-9.1	-8.5	0		119.212	8		0.0118	-7		1.13
1983-01-15	0.7	8.4	-6.2	1.9	2.2	1.6	3.5	6.8	10.3	-7.7	-8.2	-7.6	0		115.74	6		0.01	-6		0.72
1983-01-16	0.4	7.2	-4.7	1.8	2.2	2.1	3.7	6.6	10.2	-6	-6.5	-6.4	0		111.11	16		0.0102	-4		0.59
1983-01-17	3.5	11.1	-4.1	4.2	4.9	2.6	3.7	6.5	10.2	-4	-4.7	-4.3	0		108.796	19		0.0095	-1		1.04
1983-01-18	3.3	6.5	1.1	3.5	3.4	3.5	4.6	6.5	10	-0.5	-1	-0.5	7.5		20.8332	-3		0.0052	-4		2.25
1983-01-19	2.4	6.8	-2.8	3	3.2	3.1	4.2	6.5	10	-1.4	-1.9	-1.6	0		74.0736	9		0.0111	-2		1.05
1983-01-20	1.6	6.9	-4.2	2.4	2.3	3.1	4.6	6.5	9.9	-5.2	-5.8	-4.9	0		103.009	15		0.0117	-6		1.21
1983-01-21	0.3	6.7	-5.1	1.2	1.5	1.9	3.8	6.5	9.8	-7.1	-7.6	-6.8	0		115.74	13		0.0074	-6		0.8
1983-01-22	-1.5	4.6	-7.6	-0.7	-0.5	1	3.2	6.4	9.7	-10.4	-10.9	-10.1	0		130.786	9		0.0102	-8		0.74
1983-01-23	-2.6	5.8	-9.5	-0.8	0.2	0.4	2.7	6.2	9.7	-11.3	-11.7	-10.7	0		129.629	10		0.0082	-7		0.7
1983-01-24	0.4	9.7	-7	2	2.5	0.8	2.7	6	9.6	-7.9	-8.4	-7.8	0		126.157	11		0.0116	-5		1.11
1983-01-25	1.2	10	-4.9	3.6	4.5	1.4	3	5.8	9.5	-4.2	-5	-5.1	0		127.314	16		0.0114	-3		0.6
1983-01-26	4	13.1	-4.6	5.3	5.6	2	3.4	5.7	9.4	-5.1	-5.6	-5.1	0		130.786	15		0.0093	-2		1.01
1983-01-27	1.3	10.3	-5.4	4.1	4.8	1.8	3.6	5.8	9.3	-7.1	-7	-6.7	0		128.471	15		0.0142	-4		0.57
1983-01-28	1.8	11.9	-5.3	4	4.8	1.8	3.5	5.8	9.3	-6	-6.1	-6.7	0		128.471	17		0.0123	-4		0.59
1983-01-29	3.1	13.1	-4.6	5.2	6.4	2.3	3.7	5.7	9.2	-3.1	-3.1	-3.8	0		126.157	20		0.0132	-3		0.72
1983-01-30	5.4	14	-1.9	6.3	6.7	3.8	4.3	5.8	9.1	-1.4	-1.1	-1.5	1		113.425	24		0.0084	2		1.75
1983-01-31	3	8.6	-3.4	4.1	4.1	2.8	4.5	5.9	9.1	-7	-6.2	-6.5	0		141.203	20		0.0238	-6		2.08
1983-02-01	3.6	9	-2.4	3.8	3.5	3.5	4.4	5.9	9	-3.5	-3.2	-4	0		89.1198	25		0.0104	1		0.92
1983-02-02	3.4	4.2	2.9	3.5	3.2	4	4.9	6	9	0.3	0.6	0	3.5		11.574	2		0.0295	-2		0.7
1983-02-03	4	8.8	-2.9	4.9	4.8	4.6	5.3	6.1	9	-2.8	-2.1	-2.6	0.5		96.0642	14		0.007	-1		0.78
1983-02-04	0.9	7.5	-6.2	2.2	2.5	2.7	4.6	6.2	8.9	-7.2	-6.9	-7.5	0		144.675	20		0.0126	-5		0.64
1983-02-05	2	9.7	-3.3	3.5	3.6	3.1	4.6	6.2	8.9	-5.5	-5.3	-6.3	0		141.203	22		0.0136	-3		0.72
1983-02-06	3.6	12.9	-4.7	4.5	4.8	3.5	4.7	6.2	8.9	-3.4	-3.4	-4.4	0		137.731	14		0.0107	-1		1.14
1983-02-07	3.1	9.7	-1.2	3.9	4	3.7	5	6.2	8.9	-4.4	-3.9	-4.5	2.5		123.842	33		0.0331	-2		0.98
1983-02-08	1.8	8.2	-3.5	3	3.3	3.3	4.8	6.3	8.9	-6.2	-5.8	-6.8	0		134.258	16		0.0116	-4		0.79
1983-02-09	1.7	10.5	-4.9	3.6	4	2.4	4.3	6.3	8.9	-9.6	-8.9	-9.5	0		145.832	20		0.014	-5		1.04
1983-02-10	3.2	8.8	-2.4	3.9	3.8	2.9	4.3	6.2	8.9	-8.3	-7.8	-9.1	0		144.675	34		0.0135	-2		1.37
1983-02-11	0.9	7.6	-6.1	2.1	2.2	2.3	4.2	6.1	8.9	-8.4	-8.2	-10.2	0		155.092	20		0.0108	-5		1.17
1983-02-12	1.4	8.8	-5.1	2.7	3.3	2.1	3.9	6.1	8.8	-10	-9.3	-11.1	0		146.99	19		0.0132	-4		1
1983-02-13	-0.8	6.2	-8.6	-0.2	0	1.3	3.5	6	8.8	-12.6	-12	-14.6	0		157.406	18		0.0146	-6		1.08
1983-02-14	0.5	6.6	-6.8	0.8	0.9	1.6	3.4	5.8	8.8	-10.2	-9.9	-12.2	0		159.721	19		0.0144	-4		1.09
1983-02-15	3.3	10.2	-2.7	4.3	4.3	2.9	4	5.7	8.7	-5.5	-5	-7.2	0		130.786	20		0.0131	-1		1
1983-02-16	5.6	11	-3.1	6.3	6.2	3.8	4.4	5.7	8.7	-5.5	-5	-7.2	0		144.675	21		0.0103	1		1.86
1983-02-17	3.5	6.4	2.1	3.6	3.4	3.7	4.8	5.8	8.6	-0.5	0.1	-2	22.5		20.8332	5		0.019	-3		2.98
1983-02-18	4.2	7.5	1.8	4.4	4.3	4.6	5.2	5.9	8.4	-0.1	0.4	-0.6	4.5		75.231	31		0.0471	1		1.64
1983-02-19	3.5	8.8	-0.8	3.9	3.9	3.3	5	6	8.3	-8.4	-7.5	-7.7	0.5		170.138	47		0.0172	-4		1.96
1983-02-20	3	8.7	-4	4.2	4.4	2.8	4.5	6	8.3	-10.4	-9.8	-9.7	0		167.823	35		0.0139	-3		1.12
1983-02-21	2.8	8.2	-2.2	3.1	3	2.2	4.2	6	8.3	-11.5	-10.9	-11.3	0		175.925	26		0.0395	-6		1.41
1983-02-22	2.8	9.4	-5.3	3.7	3.6	2.5	4	5.9	8.3	-10.4	-10	-10.2	0		178.24	40		0.015	-3		0.45
1983-02-23	4	10.9	-4.1	4.6	4.6	4	4.8	5.8	8.3	-6.5	-6.1	-6.6	0		158.564	35		0.0079	0		0.35
1983-02-24	2.7	5.3	1.3	2.8	2.5	3.3	4.6	5.9	8.3	-1.6	-1	-1.5	10		28.935	9		0.0219	-4		0.7
1983-02-25	3.4	10.3	-2.4	4	4.1	4.2	5	5.9	8.3	-4.4	-4.1	-4.5	0		163.193	44		0.017	0		1.07
1983-02-26	3.1	8.2	-1.1	3.6	3.5	2.9	4.7	6	8.3	-10.6	-10	-10.3	0		186.341	37		0.0163	-6		1.84
1983-02-27	4.5	10	-0.5	4.9	4.6	3.3	4.6	6	8.3	-9.8	-9.3	-9.8	0		184.027	32		0.0219	-2		2.06
1983-02-28	4.2	12.6	-3.2	5.8	6.1	3.8	5	5.9	8.3	-8.5	-8.1	-15.8	0		185.184	37		0.0217	-2		1.13
1983-03-01	5.9	14	-2.9	7	7.1	4.8	5.4	6	8.3	-6.6	-6.3		0		174.767	42		0.0154	2		0.98
1983-03-02	6.2	8.1	5.1	6.4	6.1	5.7	6.2	6.1	8.3	1.5	2		4.5		19.6758	7		-0.0035	0		1.46
1983-03-03	8.4	16.7	2.7	8.7	8.3	6.7	6.9	6.3	8.3	-1.1	-0.6		0		171.295	71		0.0161	3		1.69
1983-03-04	4.5	8.1	0.8	4.9	4.7	5	6.3	6.6	8.3	-2.6	-2.3		0		68.2866	1		0.0013	-5		0.4688
1983-03-05	3	9	-2.8	3.7	3.8	4.8	6.1	6.7	8.3	-6.8	-6.3		0		200.23	48		0.0188	-3		1.02
1983-03-06	3.5	11.1	-4.7	4.3	4.4	5	6.1	6.7	8.4	-6.3	-5.6		0.5		193.286	44		0.0175	-2		1.36
1983-03-07	4.1	9.3	-2.2	4.6	4.4	4.4	5.9	6.7	8.4	-11.5	-10.9		0		194.443	47		0.0225	-3		1.58
1983-03-08	2.6	8	-3.2	3.3	3.4	4	5.8	6.7	8.4	-11.2	-10.7		0		182.869	34		0.0285	-5		1.19
1983-03-09	2.4	9.7	-6.1	3.4	3.7	4.2	5.6	6.7	8.5	-8.5	-8.1		0		199.073	44		0.0183	-1		1.01
1983-03-10	5	7	2.4	5.2	5	5.3	6	6.7	8.5	0.5	0.8		16		32.4072	10		0.0544	0		0.94
1983-03-11	8.2	15.3	2.6	9.1	8.9	6.9	7.2	6.7	8.5	-1.8	-1.3		0		206.017	76		0.0288	1		1.42
1983-03-12	7.3	10.9	0.8	7.7	7.5	6.6	7.1	6.9	8.5	-1.5	-1.2		0		124.999	35		0.0065	2		1.07
1983-03-13	7.2	10.6	4.2	7.5	7.2	7.4	7.9	7.1	8.4	3.6	4		26.5		28.935	15		0.0156	0		1.66
1983-03-14	5.2	9.2	-0.8	5.6	5.4	5.5	7.3	7.4	7.9	-7.7	-6.8		2		218.749	83		0.0313	-5		1.4
1983-03-15	4.1	11	-3.8	5.2	5.2	4.7	6.2	7.4	8.1	-6.8	-6.5		0		190.971	48		0.0155	-3		1.17
1983-03-16	5.4	9.4	-1.3	6	5.9	5.5	6.4	7.2	8.2	-2.3	-1.9		1		135.416	43		0.0099	0		1.53
1983-03-17	6.1	8.5	4.1	6.4	6.3	6.1	6.9	7.2	8.3	1.1	1.6		14		38.1942	4		0.0066	-2		1.4
1983-03-18	5.5	8.9	1.2	5.7	5.3	4.4	6.3	7.2	8.3	-8.7	-8		0		229.165	71		0.019	-6
1983-03-19	4	12.5	-4.7	5	5	5.1	6.1	7.1	8.4	-8	-7.6		0		224.536	58		0.0142	1		0.67
1983-03-20	6.2	13.4	-1.9	6.8	6.7	6.6	7	7.1	8.4	-0.3	-0.1		0		156.249	45		0.0128	3		1.2
1983-03-21	4.7	8	1	5.7	5.9	5.7	7	7.2	8.5	2.9	2.6		7.5		33.5646	-5		0.007	-6		0.7
1983-03-22	7.5	16.4	-0.1	7.9	8.5	7.9	7.7	7.3	8.5	1.4	1		0		208.332	83		0.0163	7		1.31
1983-03-23	10.8	16.9		11.2	10.8	10.5	9.6	7.5	8.6	4.6	5		4		126.157	51		0.0131	6		1.2
1983-03-24	9.9	12.5	6.7	10.1	9.7	10.3	10.6	8	8.6	5.8	6.4		12.5		46.296	24		0.0209	1		1.67
1983-03-25	7.1	9.9	5.3	7.2	6.9	8.4	9.5	8.4	8.6	-0.3	0.1		0		136.573	55		0.0107	-1		1.57
1983-03-26	7.3	11.1	5.1	7.5	7.1	8.6	9.4	8.6	8.7	-0.8	-0.4		0		131.944	49		0.0137	0		1.32
1983-03-27	5.2	6.3	3.7	5.3	4.9	7.2	8.6	8.7	8.8	0.7	1.2		6.5		53.2404	21		0.0085	-3		0.89
1983-03-28	7.5	11.7	5	7.6	7.2	8.4	9	8.7	9	2.4	2.8		0		93.7494	37		0.0094	2		1.28
1983-03-29		14.5		6.3	6.1	6.2	7.4	7.2	7.5	-2.3	-1.8		0		131.944	52		0.0092	-2		1.6
1983-03-30	8	10.9	5.4	7.9	8	8.3	9.1	8.8	9.2	1	1.5		1		62.4996	20		0.0096	0		0.76
1983-03-31	7.9	13.3	0.7	8.2	8.3	8.5	9.2	8.9	9.3	-1.7	-1.2		0		225.693	77		0.0127	0		2.05
1983-04-01	10	14.7	6	10.1	10	9.1	9.4	9	9.3	5.2	5.6		18.5		37.0368	18		-0.007	5		2.15
1983-04-02	13.5	17	9.9	13.4	13.4	12.6	11.8	9.1	9.3	5.4	5.8		0		186.341	71		0.0084	8		2.02
1983-04-03	11.4	17.3	4.3	11.3	11.3	11.6	11.8	9.5	9.4	2.1	2.5		0		228.008	75		0.0155	2		1.91
1983-04-04	12.3	19.5	5.5	12.2	12.4	11.3	11.5	9.8	9.5	4.2	4.3		0		137.731	43		0.0069	2		2.03
1983-04-05	10.5	15.3	6.7	10.4	10.6	10.9	11.6	10.1	9.6	0.7	1		0		194.443	65		0.0147	-1		1.69
1983-04-06	11.8	20.3	2.9	12.2	12.7	11.9	11.9	10.2	9.7	2.1	2.4		0		226.85	68		0.0215	6		1.08
1983-04-07	14	20.2	5.8	14.2	14.5	12.8	12.5	10.4	9.9	5.6	5.6	4.7	0		195.601	66		0.0116	8		1.78
1983-04-08	14.2	19.2	11.5	14	14.1	13.5	13.4	10.7	10	5.8	5.9	5.3	0		134.258	42		0.0114	4		1.58
1983-04-09	11.7	16.2	7.7	11.5	11.6	12.5	13.1	11.1	10.1	0.6	0.9	0.4	0		236.11	75		0.0146	4		1.98
1983-04-10	11.8	17.3	5.1	11.8	12	12.3	12.6	11.3	10.3	6	6.1	5.4	14		113.425	41		0.0089	3		1.36
1983-04-11	16	20.3	12.7	15.8	15.8	15.1	14.2	11.5	10.5	11	11.5	10.8	14.5		115.74	68		-0.0043	11		1.88
1983-04-12	11.3	14	9.1	11.1	11.1	12.5	13.8	11.8	10.7	6.9	7.3	6.7	2		28.935	8		-0.0007	-8		1.81
1983-04-13	11.9	18.2	6.4	11.9	12.1	13.6	13.8	12	10.8	4.2	4.3	3.7	0.5		252.313	105		0.0215	5		1.33
1983-04-14	11.6	18.4	3.2	11.8	12.5	12.7	13.3	12.1	10.9	3	3.2	2.4	0		224.536	76		0.0162	2		1.43
1983-04-15	14	16.8	11.3	13.8	13.9	13.6	13.8	12.2	11	10.6	10.8	10.2	13.5		34.722	18		-0.0104	4		0.97
1983-04-16	13.4	18.9	9.1	13.2	13.3	13.8	14.4	12.3	11.2	9.8	10.2	9.6	8		32.4072	20		-0.0291	-2		1.93
1983-04-17	9.5	10.6	8.7	9.3	9.3	11	12.5	12.5	11.5	6.1	6.5	6	17.5		27.7776	11		0.0054	-4		1.09
1983-04-18	11.9	16.9	8.9	11.7	11.7	13.4	13.4	12.4	11.6	6	6.4	5.9	0		217.591	95		0.0171	6		1.27
1983-04-19	12.4	15.6	7.2	12.4	12.7	13.1	13.5	12.4	11.7	8.8	8.8	7.7	5		70.6014	25		0.0033	4		0.68
1983-04-20	14.1	19.7	9.4	14.2	14.4	14.3	14.5	12.5	11.7	10.8	11	9.6	6.5		60.1848	22		0.004	1		1.17
1983-04-21	11.8	16.3	7.3	11.7	11.8	12.8	13.7	12.7	11.8	-0.6	-0.1	-0.6	0.5		249.998	91		0.0108	0		1.76
1983-04-22	12.3	15	10.4	12.3	12.6	12.6	13.5	12.7	11.8	8.1	8.4	7.5	12.5		38.1942	11		0.0102	-1		1.02
1983-04-23	14.6	19.3	9.8	14.7	15.1	13.9	14.1	12.7	12	6.6	6.7	5.9	0		159.721	59		0.0057	2		1.28
1983-04-24	14.2	24.6		14.5	15.1	13.4	12.9	11.2	10.5	6.1	6.2	5.4	0		238.424	94		0.0184	13		1
1983-04-25		27.3		13.8	14	11.6	10.6			3.5	3.5	3.3				83		0.0152	12		0.66
1983-04-26	18.3	27.5	10.4	18.6	18.9	16.7	16.6	13.5	12.1	7.7	7.6	6.5	0		246.526	87		0.014	11		1.96
1983-04-27	20.1	25.5	14.3	20.1	20.3	18	17.4	13.9	12.2	12.3	12.5	11.1	0		216.434	83		0.0069	10		3.03
1983-04-28	17.3	22.3	12.7	17.6	18	16.3	16.8	14.3	12.4	12	12	10.7	0		63.657	15		-0.0012	0		0.97
1983-04-29	17.9	24.6	14.5	17.6	17.6	18.1	17.7	14.5	12.5	13.1	13.1	12	0		145.832	71		0.0133	10		1.77
1983-04-30	12.5	15.6	8.3	12.7	12.9	14.5	16.3	14.8	12.6	7	7.3	6.6	3		62.4996	21		0.007	-11		1.81
1983-05-01	12.8	17.1	6.5	13	13.4	13.6	14.8	14.8	12.8	6.6	6.8	6.1	1		104.166	37		0.0076	-2		1.07
1983-05-02	16.1	21	13.2	15.9	15.9	16.5	16.4	14.5	12.9	9.2	9.4	8.8	0.5		196.758	94		0.0163	9		1.32
1983-05-03	16.5	21.7	10.1	16.7	17.1	17.1	17.1	14.7	13	6.2	6.4	6	0		218.749	77		0.0161	5		0.94
1983-05-04	18.1	25.6	11.1	18.6	19	18.1	17.8	14.9	13.1	8.5	8.4	7.8	0		255.785	91		0.0192	11		1.08
1983-05-05	18.1	26	12.7	18.1	18.2	18.2	18.2	15.2	13.2	8.8	8.8	8.2	0		241.897	87		0.0145	11		1.66
1983-05-06	14.8	18.5	12	14.4	14.4	16.6	17.6	15.5	13.3	8.3	8.4	7.9	2		141.203	57		0.0097	1		1.87
1983-05-07	19.1	23.6	14.5	18.9	19	18.1	17.9	15.7	13.5	14.4	14.7	13.9	8.5			30		0.0001	4		1.22
1983-05-08	16.6	23.2	10	16.7	16.9	17.6	18.2	15.8	13.6	9.1	9.2	8.6	0		199.073	68		0.0036	0		0.52
1983-05-09	15.1	21.6	7.3	15.4	15.9	17	17.5	15.9	13.7	6.3	6.2	5.5	0		276.619	99		0.0066	7		0.56
1983-05-10	15.6	21.1	9.8	15.7	16	17.1	17.8	15.9	13.8	7.8	7.9	7.2	0		253.471	92		0.0162	6		1.52
1983-05-11	18.3	24.6	11.5	18.3	18.6	18.8	18.5	16.1	13.9	10.1	10.2	9.6	0		244.211	98		0.0193	13		1.07
1983-05-12	19	23.7	13.9	19.1	19.3	19	19	16.3	14.1	12.5	12.5	11.6	0		196.758	82		0.0108	10		1.7
1983-05-13	18.9	22.8	16.2	18.6	18.7	19.4	19.4	16.6	14.2	14.6	14.9	14.1	6		108.796	51		-0.0004	2		1.49
1983-05-14	20.2	27.3	10.9	20.6	20.8	20.6	20.2	16.8	14.3	11.3	11.6	11.4	0		228.008	89		0.0151	7		1.11
1983-05-15	16.1	23.3	8	16.4	16.8	18.2	19.2	17.1	14.4	5.7	6.3	6.1	3		258.1	98		0.0151	4		1.24
1983-05-16	14.5	16	13.6	14.3	14.4	16.4	18.2	17.2	14.6	10.9	11.4	10.8	40		47.4534	25		-0.0086	-9		2.07
1983-05-17	14.6	18.3	8.3	14.5	14.6	16.5	17.4	17.1	15.6	8.3	8.6	8.2	6		222.221	109		0.0088	-2		1.67
1983-05-18	14.8	20.7	7.2	14.8	15	17	17.5	17	15.6	4.5	4.5	4.5	0		289.35	108		0.0206	3		1.08
1983-05-19	17.9	23.4	10.3	18	18.2	18	18.2	16.9	15.5	8.9	8.9	8.4	0		269.674	103		0.0081	7		2.33
1983-05-20	20	25.5	15.7	19.9	20.1	19.9	19.4	17	15.4	11.7	11.7	11.3	0		254.628	104		0.0115	11		1.17
1983-05-21	20.4	24.9	15.7	20.4	20.7	20.6	20.3	17.3	15.4	13.7	13.7	13.1	0		237.267	96		0.0133	11		1
1983-05-22	21.4	28.2	14.9	21.4	21.7	21.5	21	17.7	15.4	13.7	13.7	13.1	0		245.369	102		0.0184	14		0.86
1983-05-23	18.4	23.1	14.3	18.5	18.8	20	20.8	18	15.5	8	8.2	8.2	0		225.693	87		0.0084	7		1.33
1983-05-24	16.6	21.7	12.1	16.6	16.8	18.3	19.6	18.3	15.6	7.3	8	7.7	0		202.545	73		0.0074	1		1.81
1983-05-25	13	16.2	10.7	12.8	12.7	16.2	18.2	18.2	15.7	6.7	6.9	6.4	5		101.851	40		0.0042	-6		1.91
1983-05-26	12.2	15.5	9.5	11.9	11.8	15.8	17.4	17.9	15.8	4	4.3	4	0		281.248	109		0.0141	-3		2.11
1983-05-27	14.4	18.6	10.2	14.2	14.3	16.2	17.2	17.6	15.8	7.2	7.2	6.9	0		136.573	53		0.0143	0		0.89
1983-05-28	18.6	24	12.8	18.5	18.7	18.8	18.5	17.4	15.9	10.6	10.6	10.1	0		218.749	87		0.0107	9		1.44
1983-05-29	19	22.7	14.6	19	19.2	19.4	19.2	17.5	15.9	14.1	14.4	13.8	3		128.471	53		0.0018	5		1.07
1983-05-30	21.4	27.6	14.2	21.6	22	21.3	20.5	17.7	15.9	14.5	14.7	13.8	0		247.684	103		0.0179	10		0.78
1983-05-31	21.6	27.3	17.2	21.9	22.1	21.5	21.2	18	15.9	14.8	14.9	14.4	0		170.138	67		0.0125	3		0.69
1983-06-01	21.6	25.8	16.1	22.4	22.7	21.1	21	18.3	16	12.9	13.2	12.9	0		145.832	51		0.0034	4		0.94
1983-06-02	19.3	25.6	12.7	19.4	19.6	20.3	20.9	18.5	16	7	7.3	7.2	0		289.35	111		0.0137	9		1.66
1983-06-03	16.5	19.8	14.8	16.1	16	18.8	20	18.7	16.1	8	8.3	7.7	0		164.351	81		0.0074	4		2.08
1983-06-04	16.1	19.8	11.9	15.7	15.6	19.3	20	18.7	16.2	8.1	8.4	7.8	0		284.72	118		0.0141	10		1.93
1983-06-05	15.9	21.2	9.6	15.7	15.8	19.1	19.8	18.6	16.3	6.5	6.7	6.3	0		298.609	107		0.0215	12		1.38
1983-06-06	17.4	22.6	11.4	17.4	17.5	19.2	19.8	18.7	16.4	10.4	10.7	10.1	3.5		189.814	75		0.0106	8		1.13
1983-06-07	19.5	24.5	14.9	19.3	19.4	20.9	20.7	18.7	16.5	12.7	13	12.5	1		240.739	97		0.0171	6		0.95
1983-06-08	20.4	24.7	16.1	20.3	20.5	20.5	20.8	18.9	16.6	13.8	14	13.3	0		136.573	47		0.0029	2		1.19
1983-06-09	21.2	26.5	16.6	21.3	21.5	21.6	21.2	19	16.6	14	14.3	13.7	2			89		0.0113	8		1.43
1983-06-10	19.5	24.8	15.3	19.5	19.6	20.9	21.4	19.1	16.7	11.4	11.9	11.6	4		217.591	101		0.0097	0		1.26
1983-06-11	15.9	19.7	13.8	15.7	15.7	18.6	20.1	19.3	16.8	10.4	10.8	10.3	8.5		170.138	74		0.0035	-6		1.6
1983-06-12	14.8	17.3	13.2	14.5	14.5	16.8	18.6	19.1	16.8	9.5	9.8	9.1	9		74.0736	32		-0.008	-7		1.37
1983-06-13	17.1	20.5	15	17.3	17.5	17.6	18.3	18.8	16.9	13.9	14.2	13.2	16.5		67.1292	27		-0.0106	-1		1.16
1983-06-14	21	26.8	15.2	21.5	21.9	19.5	19.4	18.5	17	7.7	8.2	8.1	0		307.868	133		0.0184	6		1.47
1983-06-15	21.6	28.7	13.7	21.5	21.7	20.9	20.4	18.6	17	11.5	11.6	11.3	0		251.156	102		0.0078	7		1.31
1983-06-16	16.2	17.4	15.1	15.9	15.9	18.2	19.6	18.8	17	12	12.4	11.6	2		63.657	26		-0.0021	-7		1.73
1983-06-17	18.7	21	16.5	18.4	18.5	19.2	19.5	18.8	17.1	13.8	13.9	13.3	0		69.444	34		0.0053	1		0.87
1983-06-18	16.9	18	16	16.8	16.9	18.4	19.3	18.7	17.1	12.6	12.8	12.3	5		69.444	32		0.0008	-3		0.9
1983-06-19	19.8	23.8	16.6	19.5	19.6	20.6	20.1	18.6	17.1	14.2	14.4	13.9	0		208.332	105		0.0082	8		0.91
1983-06-20	19.1	23.3	16.4	18.8	18.9	19.7	20.3	18.8	17.1	14.9	15.1	14.4	15		54.3978	25		0.0045	-2		1.26
1983-06-21	19.7	24.9	17.1	19.5	19.5	20.2	20.1	19	17.7	15.3	15.7	14.9	27.5		155.092	83		0.0144	4		1.12
1983-06-22	17.7	22.1	14.6	17.4	17.4	20.3	20.8	19.1	17.8	11.9	12.3	11.4	0		263.887	124		0.0127	1		1.73
1983-06-23	15.9	17.7	14.1	15.6	15.6	18	19.3	19.2	17.7	11.5	11.7	10.8	0		54.3978	26		0.0018	-7		1.09
1983-06-24	18.2	22.3	15.7	18	18.1	18.9	19.4	19.1	17.6	14.7	14.9	13.9	27.5		65.9718	32		0.0012	1		0.95
1983-06-25	20.5	25.4	16.4	20.2	20.3	21	20.5	19	18.3	14.2	14.5	13.9	18		260.415	141		0.0203	10		1.09
1983-06-26	15.8	17.8	14	15.5	15.6	18.3	19.8	19.2	18.2	10.8	11.1	10.5	3.5		83.3328	46		-0.0041	-10		2.07
1983-06-27	15.5	17.5	13.9	15.2	15.2	17.3	18.6	19.2	18.1	10.9	11	10.3	0.5		63.657	32		0.0019	-5		1.08
1983-06-28	18.9	23.7	15.2	18.7	18.8	19.4	19.5	19	18	13.4	13.6	12.7	0		200.23	102		0.011	4		1.05
1983-06-29	19.8	24.7	14.2	19.5	19.7	20.6	20.4	18.9	17.9	13.8	13.9	13.1	0		237.267	118		0.0165	8		0.95
1983-06-30	20.9	24.8	17.5	20.8	20.9	21	21.1	19.1	17.9	14.4	14.5	13.8	0		168.98	78		0.0052	3		0.99
1983-07-01										10	10.1	9.5				3		-0.0034	-2		0.58
1983-07-02	20.1	24.1	15.9	19.8	19.7	21.4	21.8	19.6	17.8	15.2	15.6	14.5	0		143.518	78		0.0065	1		1.74
1983-07-03	18.1	20.5	15.7	17.8	17.8	19.2	20.3	19.8	17.9	14.8	15.3	14.1	22.5		91.4346	58		-0.0145	-2		1.94
1983-07-04	21.5	25.8	18.3	21.1	21.1	21.8	21.4	19.7	18	16.3	16.5	15.4	0			104		0.0146	7		1.28
1983-07-05	19.1	20.5	18.3	18.9	19	19.9	20.9	19.8	18	16.1	16.6	15.3	19		38.1942	21		0.0308	-4		1.65
1983-07-06	20	24.8	16.5	19.7	19.7	21.3	21.4	19.9	18.3	15.8	16.3	15.2	4		137.731	73		0.029	3		1.31
1983-07-07	16.3	19	14	15.9	15.9	18.6	20.2	19.9	18.3	11	11.3	10.4	1.5		101.851	61		0	-8		1.93
1983-07-08	15.4	16.9	13.6	15.1	15.1	17.5	18.9	19.8	18.3	12.3	12.6	11.6	4		40.509	21		0.0018	-6		0.9
1983-07-09	18.9	24	16.2	18.6	18.6	19.9	19.9	19.5	18.3	15.2	15.4	14.4	2.5		134.258	74		0.0111	6		0.94
1983-07-10	18.1	21.1	16.2	17.7	17.7	19.5	20.1	19.4	18.3	13.2	13.4	12.5	0		121.527	69		0.0054	-1		1.51
1983-07-11	16.7	18.5	15.5	16.6	16.6	18.3	19.5	19.5	18.2	11	11.1	10.2	0		87.9624	35		-0.0001	-6		1.5
1983-07-12	16.6	20.5	13	16.4	16.5	18	19	19.3	18.2	9.1	9.3	8.6	0		158.564	76		0.0066	-3		1.33
1983-07-13	18.3	23.3	14.1	17.9	18	19.7	19.7	19.2	18.1	11.4	11.5	10.8	0		230.323	121		0.027	7		0.98
1983-07-14	22.5	28.1	16.3	22.3	22.4	22	21.3	19.2	18.1	16.4	16.5	15.5	0		216.434	102		0.0153	9		1.25
1983-07-15	22.7	25	19.5	22.7	22.9	21.9	21.7	19.5	18.1	19.8	20	19	2.5		43.9812	19		-0.0053	4		1.46
1983-07-16	25	27.9	23.1	24.9	25	23.8	22.9	19.8	18.1	21.1	21.5	20.5	2		116.897	66		0.0017	9		1.63
1983-07-17	20.8	23.4	18.9	20.7	20.8	21.7	22.5	20.1	18.1	17.3	17.9	16.8	1		43.9812	24		-0.0051	-4		1.31
1983-07-18	20.5	23.6	18.1	20.6	20.8	21.3	21.7	20.2	18.1	17.2	17.4	16.2	7		96.0642	48		0.0181	0		0.64
1983-07-19	23.6	29.9	17.3	23.6	24.1	23	22.5	20.2	18.2	18.1	18.1	17.1	0		218.749	114		0.0137	10		0.81
1983-07-20	22.7	24	21.6	22.6	22.7	22.8	22.9	20.4	18.3	20	20.3	19.2	4		40.509	19		-0.0054	1		1.11
1983-07-21	24	26.1	22.7	24	24.2	23.4	23.1	20.6	18.3	21.2	21.6	20.3	7		62.4996	30		0.0035	4		0.58
1983-07-22	23.7	26.5	22.3	23.5	23.7	23.6	23.5	20.8	18.4	20.1	20.5	19.4	2		89.1198	51		0.0033	4		0.79
1983-07-23	23.8	27.4	21.6	23.5	23.7	23.9	23.7	20.9	18.5	19.6	19.8	18.8	0		127.314	71		0.0075	5		0.97
1983-07-24	24.6	28.2	21.8	24.7	25.1	24.2	24	21.1	18.6	19.8	20.6	19.5	0		108.796	52		0.0086	4		0.6
1983-07-25	25	30.7	21.2	25	25.2	24.8	24.5	21.3	18.7	18.7	21.1	20.1	1.5		121.527	68		0.0022	5		0.84
1983-07-26	24.4	28.7	20.8	24.2	24.3	24.8	24.8	21.5	18.8	17.8	20.5	19.6	2		196.758	114		0.0113	5		0.91
1983-07-27		30.5		21.3	21.4	22.9	23.6	20.4	17.8		20.8	20.1	60.5		165.508	92		0.0168	4		0.792
1983-07-28	25.3	30.5	20.6	25.2	25.4	24.1	24.7	22.3	21		20.9	19.8	13			13		0.0199	-1		0.792
1983-07-29	25	29.6	21	24.8	25	24.8	25.4	22.5	20.8		20.8	20	0		234.952	129		0.0056	5		0.96
1983-07-30	26.6	31.4	22.3	26.3	26.4	25.4	25.7	22.7	20.6		21.6	21.4	0		188.656	110		0.0108	7		0.93
1983-07-31	27.3	30.7	24.5	27.4	27.7	26.2	26.5	23	20.5		23.1	23	0		142.36	77		0.0139	6		0.5
1983-08-01	22.9	25.5	21.3	22.8	23	23.5	25.4	23.2	20.5		20.4	20	3		69.444	37		-0.0026	-6		1.48
1983-08-02	22.1	25.7	20.1	21.7	21.7	22.7	24.3	23.2	20.5		17.3	17.2	0		188.656	112		0.012	-2		1.51
1983-08-03	24.5	30.8	17.7	24.3	24.5	23.7	24.5	23	20.5		19.4	19.2	0		214.119	118		0.0211	5		0.67
1983-08-04	27.1	31.4	24.1	26.8	26.9	25.7	25.9	23	20.5		22.6	22.5	0		222.221	125		0.0183	8		1.07
1983-08-05	27.6	32.7	24.3	27.3	27.5	26.3	26.5	23.2	20.5		23.1	23	0		179.397	100		0.0173	6		0.78
1983-08-06	27.6	33.1	23.3	27.5	27.8	26.3	26.7	23.5	20.5		22.7	22.5	0			107		0.0215	5		0.77
1983-08-07	27.6	32.6	23.3	27.5	27.7	26.4	26.8	23.6	20.6		22.9	22.7	0			111		0.0186	5		1
1983-08-08	27.5	33.7	22.4	27.7	28.1	26.5	27	23.8	20.6		21.9	21.8	0		226.85	118		0.026	5		0.9
1983-08-09	26.2	31.9	22.3	26	26.1	26.1	26.8	24	20.7		21.2	21.1	0		214.119	111		0.0242	5		1.11
1983-08-10	24.7	28.1	22.5	24.4	24.4	24.8	26.1	24.1	20.8		20.2	20	0			57		0.0098	1		1.3
1983-08-11	25.9	30.7	22.3	25.6	25.7	25.5	26.1	24	20.9		20.9	20.7	0		193.286	102		0.0274	5		0.76
1983-08-12	27	32.6	21.8	27	27.2	25.9	26.4	24	21		21.1	21	0		221.063	116		0.0269	6		0.7
1983-08-13	26.4	31.5	22.5	26.3	26.4	25.6	26.5	24	21		21.1	20.9	0		207.175	106		0.0205	4		1
1983-08-14	25.7	29.3	22.4	25.5	25.6	25	26	24.1	21.1		21.3	21.2	0		175.925	97		0.0229	3		1.91
1983-08-15	24.6	25.5	24	24.5	24.6	23.9	25.4	24.1	21.1		22.4	22.2	28.5		38.1942	24			-1		2.67
1983-08-16	26.1	28.9	24.5	25.9	26	24.9	25.7	24	21.2		24	23.8	19		111.11	70			4		2.03
1983-08-17	25.7	26.8	24.4	25.6	25.7	24.5	25.6	24.2	22		23.4	23.2	31		38.1942	25			0		2.02
1983-08-18	26.4	29.5	24.4	26.4	26.5	25.1	25.7	24.3	22.5		23.5	23.4	10.5		101.851	61			4		1.15
1983-08-19	28.1	33.3	23.9	28.1	28.5	26.5	26.7	24.3	22.4		22	22	0		192.128	110		0.0204	6		1.01
1983-08-20	25.7	31.7	21.7	25.7	25.9	25.3	26.5	24.4	22.2		19.8	19.7	0		199.073	109		0.0182	-1		1.36
1983-08-21	21.7	23.1	20.6	21.5	21.5	22.7	24.8	24.5	22.1		17.5	17.4	0		57.87	26		0.0029	-8		1.03
1983-08-22	22.8	25.9	20.2	22.6	22.6	22.6	24.1	24.2	22.1		18.8	18.7	0		75.231	38		0.0094	-2		0.86
1983-08-23	23.2	26.2	21.2	23	23.1	22.7	24.2	24	22		16.9	17	0		127.314	70		0.0079	-3		1.26
1983-08-24	21.2	23	19.6	21	20.9	21.8	23.5	23.8	21.9		17	17.1	0		57.87	32		0.0054	-5		1.06
1983-08-25	23.6	28.6	19.4	23.5	23.7	23.2	23.9	23.6	21.9			16.4	0		148.147	85		0.0272	4		0.62
1983-08-26	23.2	25.6	21.7	23	23	22.9	24.2	23.4	21.8	18.5		17.5	0		127.314	76	415.398	0.009	-2	1008	1.81
1983-08-27	22.4	24.7	21.1	22.2	22.1	22.4	23.8	23.4	21.7	17.4	17.2	17.4	0		98.379	56	415.278	0.0097	-3	1010.9	1.67
1983-08-28	23	26.1	21	22.8	22.7	22.7	23.8	23.3	21.7	17.3	17	17.4	0		131.944	78	412.002	0.019	0	1012	0.98
1983-08-29	25.9	32.1	21.6	25.9	26	24.3	24.6	23.3	21.6	21	20.7	21.2	0		180.554	105	424.692	0.0246	5	1008	0.71
1983-08-30	27.5	33.4	23.1	27.6	27.8	25.4	25.6	23.3	21.6	20.8	20.5	21	0		206.017	114	429.363	0.0208	4	1008.7	0.87
1983-08-31	26.5	29.9	23.8	26.5	26.6	25	25.7	23.5	21.6	20.9	20.6	21.2	0		133.101	69	435.498	0.0115	2	1010.8	0.85
1983-09-01	23.9	26.5	21.7	24	24.2	23.3	24.9	23.7	21.9	20.2	19.8	20.4	41		67.1292	30	431.287	-0.0018	-2	1011.6	0.7
1983-09-02	24.2	28.8	20.3	24.3	24.2	23.7	24.6	23.7	22.2	19.3	19	19.6	0		166.666	91	414.284	0.0197	0	1010.7	0.99
1983-09-03	25.2	30.3	21.4	25.3	25.2	24.2	25	23.6	22	20.3	19.9	20.5	0		155.092	82	423.218	0.0216	2	1012.2	0.76
1983-09-04	25.8	31.4	22.1	26	25.8	24.7	25.4	23.6	22	21.1	20.7	21.5	0		156.249	86	427.507	0.0252	3	1013.8	0.68
1983-09-05	26.5	31.7	22.3	26.8	26.5	25	25.7	23.7	21.9	21.1	20.7	21.5	0			88		0.0207	3	1013.4	0.58
1983-09-06	27.2	32.5	22.8	27.8	27.6	25.4	26	23.8	21.8	20.8	20.5	21.2	0		188.656	101	429.406	0.0208	2	1011.4	0.73
1983-09-07	24.7	31.2	20.8	25.1	24.9	24	25.4	24	22	20.5	20	20.7	57		142.36	78	422.216	0.0546	-2	1008.7	0.75
1983-09-08	21.4	23	20.7	21.7	21.4	21.9	23.7	24	22.9	18.4	18.4	19.2	31.5		35.8794	13	421.913	0.0264	-5	1008	0.77
1983-09-09	21.2	24.4	19.5	21.4	21	21.7	23.2	23.7	23	15.8	15.6	16.3	0		172.453	99	390.61	0.0151	-5	1007.5	1.48
1983-09-10	21.5	24.6	19.2	21.5	21.3	21.4	22.9	23.5	22.8	16.2	15.9	16.7	0		86.805	48	410.361	0.013	-2	1007.1	0.78
1983-09-11	22.5	24.6	21.2	22.3	22.4	21.9	23.1	23.3	22.7	18.6	18.3	19.1	0.5		52.083	28	424.725	0.0032	0	1005.1	0.94
1983-09-12	24.4	28.4	22	24.2	24.3	22.9	23.7	23.2	22.5	20.5	20.2	21.1	0		96.0642	56	428.036	0.0143	4	1000.6	0.72
1983-09-13	24.5	30.3	19.6	24.7	25.1	23.1	24.2	23.2	22.4	15.4	15.2	16.4	0		216.434	108	397.748	0.0195	-2	1003.6	1.11
1983-09-14	21.6	25.9	17.6	21.5	21.8	21.7	23.3	23.3	22.3	14	13.9	15	0		152.777	79	393.491	0.0166	-3	1007.8	0.9
1983-09-15	19	20.2	17.5	18.8	18.9	20.2	22.4	23.2	22.2	15.1	15	16	11		19.6758	8	411.235	-0.0036	-7	1008.8	0.99
1983-09-16		19.2								9.4	9.1	9.4	11.5		6.9444	0		0.0109	-6		0.79
1983-09-17	19.8	25.7	14.9	19.6	19.8	19.6	21.3	22.5	22.2	13.9	13.8	14	0.5		197.915	101	373.512	0.0256	-3	1008.4	1.39
1983-09-18	18.9	21.1	16.3	18.8	18.9	19.1	21	22.2	22.1	12.8	12.8	13.1	0		70.6014	34	396.97	0.005	-5	1014	1.05
1983-09-19	19.1	22	15.7	19.1	19.2	19.1	20.8	22	21.9	13.3	13.3	13.7	0		96.0642	52	391.92	0.0098	-3	1017.4	0.84
1983-09-20	20.1	22.7	17.2	20	20.2	19.6	21.1	21.8	21.7	15.5	15.6	16.1	0.5		65.9718	31	405.938	0.0077	0	1014.6	0.47
1983-09-21	20.2	22.3	18.8	20	20	19.9	21.3	21.7	21.6	16.5	16.4	16.7	0.5		57.87	34	408.785	0.0001	-1	1010.5	1.04
1983-09-22	20.8	24.9	17.6	20.7	20.7	20.2	21.5	21.7	21.5	17.4	17.4	17.9	17.5		69.444	39	409.817	0.0235	0	1005.9	0.96
1983-09-23	18.9	23.4	14.5	19.1	19.3	19.3	21.1	21.6	21.4	13.4	13.2	13.5	0.5		179.397	91	370.679	0.0158	-5	1013.2	1.08
1983-09-24	17.6	18.1	17.2	17.4	17.4	18.5	20.5	21.5	21.3	14.5	14.6	15.1	17		34.722	20	399.155	0.0012	-4	1007.2	0.96
1983-09-25	19.7	22.6	17.1	19.6	19.7	19.2	20.5	21.3	21.3	16.1	16.1	16.6	1		71.7588	38	402.078	0.013	1	1007.3	0.64
1983-09-26	19.2	21.2	16.8	19.2	19.4	19	20.6	21.1	21.2	14.5	14.5	14.9	1		63.657	28	400.367	0.0018	-3	1013.9	0.93
1983-09-27	16.1	18.3	14.9	16.1	16.4	17.5	19.8	21.1	21.1	12.8	12.9	13.4	15		32.4072	16	391.073	0.0031	-6	1015.3	0.57
1983-09-28	15.6	16.5	15	15.4	15.4	16.1	18.6	20.8	21	12.5	12.4	12.8	67		24.3054	14	390.482		-7	1004.5	0.86
1983-09-29	16.7	20.8	13.9	16.6	16.6	16.2	18	20.1	20.5	7.9	8.1	8.9	8		193.286	101	346.437	0.019	-5	1008.9	0.62
1983-09-30	16.7	20.5	13	17	17.3	16.3	18.1	19.8	20.3	9.4	9.6	10.4	0		126.157	59	365.95	0.0071	-3	1016.5	0.17
1983-10-01	19.5	25.9	14.2	19.6	19.8	17.7	18.8	19.6	20.3	12.1	12.3	13	1		177.082	81	369.92	0.0109	2	1012.4	0.32
1983-10-02	19	23.1	15.6	19.1	19.4	18.1	19.4	19.6	20.2	13	12.9	13.3	0		123.842	59	381.614	0.0059	-2	1014.4	0.26
1983-10-03	19.5	26	14.6	19.5	19.7	18	19.3	19.6	20.1	14.1	14	14.3	0		130.786	69	383.487	0.0047	1	1013.5	0.65
1983-10-04	20.5	23.5	17.5	20.3	20.3	19	20	19.7	20.1	15.6	15.6	16	0		82.1754	43	402.35	0.0106	2	1012.6	0.77
1983-10-05	20.8	24.9	15.4	21.1	21.3	19.6	20.6	19.8	20	15.4	15.6	16.4	6.5		104.166	48	397.893	0.0146	-1	1003.9	0.6
1983-10-06	17.3	21.7	13.7	17.4	17.7	17.5	19.5	20	20	7.9	8.3	9.4	0		143.518	65	360.567	0.0142	-6	1009.3	0.81
1983-10-07	16.5	21.9	11.8	16.7	16.9	16.7	18.9	19.9	19.9	8.4	8.4	9	0		165.508	67	350.756	0.0194	-8	1013.2	0.84
1983-10-08	15.8	18.5	13.9	15.7	15.8	15.8	18.1	19.7	19.9	9.8	10	10.6	2		52.083	23	381.767	-0.0047	-6	1020.8	0.95
1983-10-09	17.2	18.8	15	17	17	16.7	18.2	19.5	19.9	14.7	14.6	15.1	15		35.8794	19	395.657	0.0145	0	1012.5	0.8
1983-10-10	19.8	23.1	17.9	19.7	19.9	17.9	19	19.3	19.8	14.1	14.2	14.8	0		103.009	48	390.584	0.0059	1	1013.3	0.82
1983-10-11	17.6	22.1	12.9	18.1	18.3	17.4	19	19.3	19.7	13.1	13.2	13.9	21.5		31.2498	0	398.613	0.0033	-5	1005.9	0.73
1983-10-12	14.2	19.1	9.8	14.6	14.9	15	17.5	19.3	19.6	5.3	5.5	6.3	0		162.036	69	334.977	0.0178	-10	1015.6	0.76
1983-10-13	16.4	19.3	13.4	16.3	16.4	15.8	17.5	19	19.6	10.9	11	11.6	0		52.083	31	384.665	0.0113	-1	1011.5	0.54
1983-10-14	16.8	20.7	13	16.9	17.2	16.1	17.8	18.8	19.5	10.1	10.3	10.9	0.5		83.3328	35	376.204	0.0054	-4	1013.2	0.64
1983-10-15	15.4	19.2	11.6	15.7	15.9	14.8	17	18.8	19.4	7.2	7.4	8.1	0.5		93.7494	36	363.293	0.0065	-6	1018.5	0.76
1983-10-16	15.1	18.2	12.1	15.3	15.3	15.3	17.2	18.6	19.3	11.7	11.6	11.7	7.5		68.2866	40	372.702	0.0128	-4	1009.4	0.79
1983-10-17	15.6	21.3	12.1	16.1	16.6	15.3	17.1	18.4	19.3	11	11	11.3	0		121.527	64	358.522	0.0199	-4	1008.7	0.63
1983-10-18	14	16.9	11.1	14.2	14.4	14.2	16.6	18.3	19.2	5.6	5.8	6.4	0		122.684	56	344.439	0.0052	-8	1015.2	1.27
1983-10-19	12.2	14.2	10.8	12.3	12.4	13.2	15.7	18.1	19.1	7.2	7.5	8.2	20.5		26.6202	12	369.599	0.0014	-7	1016.4	0.68
1983-10-20	15.8	22.2	11.8	15.6	15.6	14.4	15.9	17.7	18.8	10	10.1	10.6	5.5		129.629	79	354.999	0.0203	1	1009.8	0.85
1983-10-21	13.8	15.4	12.6	13.7	13.6	14.1	16.1	17.5	18.7	9.2	9.2	9.5	3		20.8332	9	380.226	0.0015	-6	1015.3	1.24
1983-10-22	15.4	20.1	11.9	15.5	15.5	14.8	16.2	17.5	18.7	10.5	10.6	11.1	0.5		106.481	62	360.039	0.0224	0	1010.5	0.66
1983-10-23	13.8	16.8	9.3	13.9	14	14.2	16.3	17.4	18.6	7.5	7.7	8.1	2.5		61.3422	32	364.639	0.002	-7	1007.8	0.88
1983-10-24	10.5	17	3.2	11.2	11.5	12.6	15.3	17.4	18.5	2.1	2.6	3.3	0.5		145.832	64	314.403	0.025	-12	1011.3	0.62
1983-10-25	8.4	16.9	1.7	9.8	10.5	9.8	13.3	17.1	18.4	-0.4	-0.1	0.3	0		149.305	59	301.09	0.0256	-14	1018.2	0.85
1983-10-26	10.4	16.7	1.4	11	12.1	9.9	12.5	16.6	18.3	3.6	3.8	3.8	0		116.897	61	324.795	0.0174	-6	1022.2	0.66
1983-10-27	12.8	21	5.8	13.7	14.2	12	13.9	16.2	18.2	5.9	6.2	6.7	13		122.684	60	335.654	0.0333	-5	1011.5	0.91
1983-10-28	11.4	18.4	4.1	12.3	13.1	10.6	13	16	18.1	4.7	4.9	4.8	0		127.314	57	325.997	0.0189	-7	1017.6	0.62
1983-10-29	13.3	21	7.9	13.5	13.6	11.9	13.7	15.8	17.9	3.8	3.9	4.3	0		133.101	45	331.2	0.0182	-4	1012.2	0.9
1983-10-30	8.1	13.9	2.8	9.1	9.4	9.6	12.7	15.7	17.8	-3.8	-3.2	-1.8	0		142.36	48	296.611	0.0214	-13	1019.8	0.55
1983-10-31	8	14.3	1.5	8.6	9.1	8.6	11.5	15.4	17.6	1.4	1.7	1.7	0		109.953	43	312.582	0.016	-10	1017.8	0.64
1983-11-01	10.3	17.5	2.6	10.6	10.7	9.4	11.7	15	17.5	4.2	4.2	4.2	0		124.999	51	319.553	0.013	-5	1012.4	0.96
1983-11-02	12.4	17.9	8	12.5	12.8	11.1	12.6	14.8	17.4	5.8	5.8	5.9	0		129.629	47	328.879	0.0224	-2	1014.2	0.69
1983-11-03	11.6	18.4	5	12.7	13.4	10.4	12.5	14.7	17.2	7	7	6.6	0		101.851	50	335.946	0.0192	-6	1015.9	0.45
1983-11-04	12	15.6	7.9	12.3	12.8	10.6	12.5	14.7	17.1	7	7	7	0		45.1386	16	359.344	-0.0012	-3	1018.3	0.85
1983-11-05	13.2	16.7	10.4	13.2	13.3	11.6	13.1	14.6	17	6.5	6.7	7.1	0		61.3422	25	358.31	0.0037	-1	1017.5	0.97
1983-11-06	11.3	12.3	10.7	11.5	11.4	11.2	13.2	14.7	16.8	7	7.4	7.6	14		11.574	4	369.681	-0.0013	-4	1010.9	1.25
1983-11-07	11.4	15	8.4	11.7	11.8	11	13	14.6	16.7	5.6	5.9	6.1	9		55.5552	22	350.761	0.0065	-5	1009.5	1.2
1983-11-08	10.1	16.9	3.7	11	11.5	9.5	12.1	14.5	16.5	4	4	3.8	0		121.527	48	316.843	0.0221	-9	1016.6	0.59
1983-11-09	11.1	17.1	4	11.6	11.8	9.4	11.6	14.3	16.5	4.9	4.9	4.8	0.5		100.694	52	329.988	0.0097	-3	1020.3	1.16
1983-11-10	12.7	15.1	9.7	12.8	12.9	11.1	12.5	14.1	16.4	9.3	9.5	9.7	6		38.1942	20	365.645	0.0055	0	1012	1.13
1983-11-11	14.3	20	11	14.6	14.8	12.1	13.4	14.1	16.3	9	9	9.3	0		105.323	51	346.59	0.0189	0	1002.2	0.67
1983-11-12	11.1	18.6	5.5	11.6	12	11	13	14.2	16.2	6.3	6.1	5.9	0		69.444	22	342.573	0.0096	-7	999.1	0.65
1983-11-13	8.7	15.4	2	9.1	9.4	9	11.9	14.2	16.1	-0.9	-0.7	-0.5	0		119.212	41	304.15	0.0186	-11	1002.2	1.12
1983-11-14	8.7	16	1.1	9.7	10	7.8	10.7	14	16	-1.1	-0.9	-0.7	0		120.37	24	303.156	0.0215	-9	1012.3	0.87
1983-11-15	7.5	12.4	2.2	7.7	7.9	7.4	10.1	13.6	16	2.2	2.2	2.3	0		38.1942	13	336.69	0.0048	-7	1016.2	0.7
1983-11-16	11.3	17	6	11.3	11.3	9.6	11.1	13.3	15.9	5.2	5.1	5.2	0		107.638	35	325.64	0.0181	0	1011.4	0.95
1983-11-17	11.5	20.3	5.4	11.9	12.1	9.5	11.4	13.3	15.8	3	2.8	2.8	0		92.592	23	330.273	0.0137	-4	1001.3	1.62
1983-11-18	9.5	14.8	5.5	9.8	10	7.9	10.7	13.3	15.7	-5.4	-5.2	-4.8	0		111.11	5	304.934	0.013	-9	1001.7	1.52
1983-11-19	9.8	16.3	3.9	10.5	10.8	7.6	10.2	13.1	15.6	-3.7	-3.5	-3.4	0		118.055	14	304.064	0.0148	-8	1013.5	1.94
1983-11-20	7.1	14.2	1.7	8.5	9.2	6.6	9.5	12.9	15.5	0.9	0.9	0.7	0		82.1754	27	312.456	0.0163	-10	1019.1	0.52
1983-11-21	6.3	15.3	0.3	8	9	5.8	8.9	12.6	15.4	0.9	0.8	0.2	0		105.323	43	298.319	0.0206	-12	1016.6	0.59
1983-11-22	5.6	12.9	-2	6.2	6.5	5.3	8.4	12.3	15.3	-4.8	-4.7	-4.6	0		109.953	28	287.893	0.0121	-11	1018.7	1.09
1983-11-23	4.5	11.6	-2.8	5.1	5.4	4.1	7.3	12	15.1	-4.7	-4.5	-4.3	0		109.953	28	283.075	0.0228	-10	1021.6	0.63
1983-11-24	8	15.3	3.8	9	9.5	6.4	8.3	11.6	15	5.1	4.9	4.3	16		63.657	36	326.648	0.0295	-3	1004.7	0.85
1983-11-25	7.5	14.1	1.4	8.6	9	5.8	8.1	11.4	14.8	0.2	0.4	0.5	0		82.1754	29	311.961	0.0123	-5	1005.7	0.72
1983-11-26	6.7	12.1	2.2	6.7	6.7	6.6	8.7	11.3	14.7	-1.7	-1.7	-1.5	0		77.5458	10	309.036	0.0143	-5	1005.7	0.97
1983-11-27	4.7	9.5	-2.3	5	5	4.8	7.8	11.2	14.5	-7.7	-7.5	-7.4	0		112.268	2	278.84	0.0213	-10	1015	1.83
1983-11-28	2.9	9.9	-2.6	4.9	5.5	3.4	6.8	11	14.3	-5.8	-5.7	-5.7	0		107.638	13	274.929	0.0209	-14	1025	0.5
1983-11-29	1.9	11.1	-4.9	3.3	4.1	2.2	5.7	10.7	14.2	-2.7	-2.9	-3.5	0.5		97.2216	33	277.83	0.0208	-13	1026.5	0.5
1983-11-30	6.1	14.1	-2.7	6.5	6.8	3.8	6	10.3	14.1	1.1	0.8	0.7	0		77.5458	35	307.248	0.0157	-3	1008.9	0.77
1983-12-01	8.5	12.2	1.6	8.8	9.1	5	7.1	10	13.9	-4.9	-4.8	-4.8	0		106.481	5	297.702	0.0202	-3	1002.4	2.18
1983-12-02	5.6	14.4	-1.3	8.1	9.1	4.2	6.9	10	13.8	-1.1	-1.4	-2.2	0		89.1198	13	297.121	0.0139	-8	1006.2	0.67
1983-12-03	6.7	16.4	-1.4	7.8	8.4	4.1	6.5	9.9	13.6	-2.8	-2.8	-3.4	0		90.2772	14	299.54	0.021	-4	1003.7	1.08
1983-12-04	5.1	10.6	-1.1	6.2	6.4	4	6.7	9.8	13.5	-7	-6.9	-6.8	0		103.009	4	282.869	0.0182	-8	1010.2	1.49
1983-12-05	4.8	11.9	-1.9	5.6	6	3.6	6.2	9.7	13.3	-2.9	-2.8	-2.7	0		92.592	19	289.713	0.0139	-4	1008.4	0.65
1983-12-06	4.6	10.6	-2.1	5.8	6.2	3.7	6.4	9.5	13.2	-5.3	-5.3	-5.3	0		97.2216	3	284.396	0.0157	-7	1012.7	0.86
1983-12-07	2	10.8	-5.2	3.9	4.6	2	5.4	9.4	13.1	-4.8	-4.9	-5.1	0		100.694	14	272.309	0.0189	-2	1017.5	0.49
1983-12-08	3.5	11.9	-1	5.4	5.8	2.8	5.4	9.1	13	-3.4	-3.4	-3.4	0		65.9718	4	297.132	0.0116	1	1013.6	0.65
1983-12-09	3.8	11.6	-3.6	5.5	6.7	2.3	5.4	9	12.8	-1.9	-2.2	-2.9	0		94.9068	16	284.285	0.009	0	1016.7	0.57
1983-12-10	5.6	14.1	-1.1	6.4	6.8	2.9	5.6	8.8	12.7	-0.5	-0.8	-1.2	0		89.1198	14	295.628	0.0069	-3	1015.2	0.84
1983-12-11	6.1	10.9	0.9	6.4	7	3.7	6	8.7	12.5	-0.1	-0.4	-0.5	0		25.4628	-11	332.914	0.0066	0	999.9	1.17
1983-12-12	5.6	10.9	-0.7	6.3	6.5	2.9	5.9	8.7	12.4	-6.1	-6	-6	0		99.5364	-9	285.031	0.017	-4	1010.1	1.84
1983-12-13	2.4	11.3	-2.7	4.3	5.6	1.9	5.1	8.6	12.3	-3.4	-3.6	-4.3	0		91.4346	5	278.198	0.0134	-11	1016	0.6
1983-12-14	5.1	12.1	-2.1	6.4	7.3	2.7	5.2	8.5	12.2	-2.4	-2.3	-2.4	0		65.9718	7	303.58	0.0049	-4	1009.7	0.9
1983-12-15	3	8	-0.8	3.8	4.1	3.1	5.7	8.3	12.1	-5.1	-5	-4.9	0		74.0736	0	288.283	0.0086	-5	1009.5	0.57
1983-12-16	2.2	10	-3.2	3.6	4.1	1.6	4.9	8.3	12	-6.8	-6.7	-6.6	0		92.592	-6	273.752	0.0107	-7	1009.1	1.12
1983-12-17	1.1	6.3	-4.5	1.4	1.6	1.6	4.6	8.1	11.9	-5.2	-5.2	-5.3	0		81.018	6	276.35	0.0081	-5	1008.3	1.43
1983-12-18	0.4	5.3	-5.2	1.2	1.5	1.3	4.5	7.9	11.8	-8.4	-8.3	-8.4	0		99.5364	-6	261.726	0.0182	-7	1009.7	1.21
1983-12-19	0	8.9	-6.8	1.9	2.6	-0.1	3.6	7.7	11.7	-8.3	-8.3	-8.6	0		96.0642	-6	261.935	0.011	-8	1009	1.88
1983-12-20	1.6	6.6	-3.6	2	2.3	0.3	3.5	7.5	11.6	-8.7	-8.6	-8.8	0		91.4346	-15	270.323	0.0107	-6	1013.3	1.24
1983-12-21	-1.4	7.5	-8.2	0.9	2.5	-0.6	3	7.3	11.5	-9.5	-9.4	-9.9	0		98.379	-7	254.607	0.0111	-7	1022
1983-12-22	2.7	9.9	-4.2	2.9	3.3	1.1	3.2	7	11.3	-3.3	-3.2	-3.6	0.5		52.083	7	299.84	0.0067	-2	1013	0.89
1983-12-23	5.7	11.7	1.2	5.6	5.7	3.8	5.1	6.9	11.2	-1.9	-1.7	-1.8	2		49.7682	-6	315.029	0.0061	1	1001.2	1.1
1983-12-24	1.7	4.6	-3.6	2	2.1	1.5	4.2	7	11.1	-7.5	-7.5	-7.5	0		54.3978	-6	292.364	0.0035	-5	1013	0.94
1983-12-25	1.6	7.7	-3.4	1.7	1.9	1.3	4.1	7	10.9	-8.1	-8	-8.2	0		103.009	-14	264.057	0.0141	-6	1009.2	1.44
1983-12-26	-0.3	6.1	-6.1	0.5	1	-0.1	3.3	6.9	10.8	-11	-10.8	-11	0		106.481	-12	253.141	0.0127	-7	1012.2	1.37
1983-12-27	-2.3	6.2	-8.7	-0.2	1	-0.9	2.6	6.7	10.8	-10.8	-10.6	-10.7	0		106.481	-7	245.954	0.0106	-6	1015.5
1983-12-28	-0.2	7	-6.9	0.4	0.9	-1	2.3	6.5	10.7	-6.6	-6.7	-7.1	0		93.7494	-1	263.025	0.0074	-6	1014.4	1.13
1983-12-29	0.2	7.5	-5	1.5	2.1	0.4	2.8	6.2	10.5	-6.5	-6.6	-6.9	0		92.592	-5	265.263	0.012	-3	1014.3	0.59
1983-12-30	-0.3	4.4	-5.7	0.2	0.6	0	2.6	6.1	10.4	-5.3	-5.6	-5.8	0		39.3516	-4	293.509	0.0039	-5	1010.8	0.57
1983-12-31	1.8	8.4	-4.4	2.8	3.4	1.3	3.3	6	10.3	-4.6	-4.5	-4.9	0		79.8606	16	279.62	0.0109	-2	1006.7	0.88
1984-01-01	-0.4	8.4	-6.5	1.9	3	-0.2	2.9	6	10.2	-7.5	-7.5	-8.1	0		112.268	20	252.427	0.012	-5	1012.7	0.69
1984-01-02	0	8.1	-6.9	1.3	2.2	-0.2	2.6	5.9	10.1	-6	-6.2	-6.8	0		91.4346	0	265.669	0.0094	-5	1015.7	0.6
1984-01-03	1.5	8.9	-4.9	1.8	2	0.7	2.7	5.8	10	-2.1	-2.3	-2.7	4		71.7588	14	284.626	0.0089	-3	1009.2	1
1984-01-04	3.4	8.8	-1.4	3.8	4	2.5	4	5.8	9.9	-2.6	-2.5	-2.5	1.5		98.379	11	278.259	0.0367	0	1004.2	1.06
1984-01-05	0.3	6.7	-5.5	1.6	2.2	0.7	3.4	5.9	9.8	-8	-7.8	-7.7	0		109.953	-8	256.274	0.0138		1009	0.79
1984-01-06	0.4	7.1	-6.4	1.6	2.1	0.1	2.9	5.9	9.7	-9.8	-9.6	-9.5	0		111.11	-6	255.037	0.0111	-5	1013.9	1.28
1984-01-07	-0.4	7.4	-6.1	1.1	1.7	-0.1	2.6	5.8	9.6	-8.7	-8.7	-8.7	0		109.953	-3	253.538	0.0151	-4	1010.7	0.62
1984-01-08	-2.3	4.9	-8	-0.8	0.3	-0.5	2.3	5.6	9.6	-9.9	-9.7	-10	0		109.953	-5	245.937	0.0129	-5	1009.3	0.52
1984-01-09	-0.9	8.1	-6.1	0.7	1.7	-0.6	2.1	5.5	9.5	-8	-8	-8.2	0		105.323	-4	254.775	0.0112	-5	1004.3	0.77
1984-01-10	0.8	10.2	-5.7	2.4	3.3	-0.3	2.2	5.3	9.4	-5.2	-5.4	-6.4	0		106.481	1	262.793	0.0093	-4	1003.2	0.75
1984-01-11	2.1	7.4	-1.8	2.7	3	0.1	2.3	5.2	9.3	-9	-8.8	-9	0		112.268	-4	262.38	0.0115	-4	1004.2	0.94
1984-01-12	-1.2	5.7	-6.4	0.5	1	-0.5	2.1	5.1	9.2	-10.3	-10.3	-10.4	0		111.11	-7	250.072	0.0114	-5	1010.7	0.64
1984-01-13	-0.9	7.4	-7.5	0.6	1.8	-0.8	1.9	5	9.1	-9.8	-9.4	-9.7	0		115.74	0	249.492	0.0127	-6	1010	0.74
1984-01-14	0.6	7.1	-4.2	1.4	1.9	0	2	4.9	9.1	-3.8	-3.9	-5	0		72.9162	12	280.856	0.0083	-3	1011.8	0.75
1984-01-15	1.9	10.5	-4.4	3	4.2	0.3	2.2	4.9	9	-3.3	-3.6	-4.2	0		87.9624	19	279.015	0.0121	-3	1006.5	0.72
1984-01-16	1.4	4.2	-2.9	1.5	1.7	0.8	2.7	4.8	8.9	-10.8	-10.7	-10.9	0		97.2216	4	267.8	0.0148	-2	1004.3	0.98
1984-01-17	-0.1	5.3	-7.2	0	0.5	-0.4	2.1	4.9	8.8	-12.7	-12.5	-12.8	0		113.425	-15	252.969	0.0155	-4	1007.8	1.56
1984-01-18	0.4	6.4	-3.9	0.9	1.2	-0.6	1.8	4.8	8.7	-11.9	-11.9	-12.2	0		120.37	-2	252.267	0.0147	-4	1011.9	1.43
1984-01-19	-1.4	-0.6	-2.6	-1.3	-1.4	-0.4	1.7	4.7	8.7	-4.7	-4.8	-5.4	2		23.148	-4	299.618	0.0391	-3	1010	0.96
1984-01-20	-5.3	0.4		-3.8	-2.2	0.2	1.9	4.6	8.6	-9.2	-9.2	-10	6.5		136.573		227.385	0.0151	-3	1014.4	1.06
1984-01-21													0.5								0.6708
1984-01-22													0								1.3172
1984-01-23													0								0.7516
1984-01-24													0								0.4284
1984-01-25													0								0.4688
1984-01-26													0								0.9536
1984-01-27													0								1.0748
1984-01-28													0								0.4284
1984-01-29													0								1.6
1984-01-30													0								0.4688
1984-01-31													0								1.0344
1984-02-01	1.3	6.4	-2.9	2.4	3.2	-0.5	1.4	3.9	7.7	-4	-3.3	-3.6	6.5		149.305	6	255.363	-0.0082	-3	1012.7	1.48
1984-02-02	-0.4	7.2	-5.1	0.9	1.8	-0.3	1.5	3.9	7.6	-5.5	-5.5	-5.7	0		115.74	13	261.742	0.0042	-2	1010.8	0.59
1984-02-03	-0.4	4.6	-4.3	0.2	1	-0.3	1.5	3.8	7.5	-9.5	-9.2	-9.2	0		104.166	4	264.776	0.0109	-2	1007.9	1.12
1984-02-04	-2.9	1.8	-7	-2.2	-2	-0.5	1.4	3.8	7.4	-14.2	-13.9	-13.3	0		153.934	11	232.1	0.0184	-3	1014.8	1.31
1984-02-05	-3	2.9	-10.2	-2.5	-2.1	-0.9	1.2	3.7	7.3	-10.9	-10.7	-10.8	0		118.055	5	248.986	0.0096	-3	1010.3	0.73
1984-02-06	-1	1.5	-5.3	-0.9	-0.7	-0.8	1.1	3.7	7.3	-11	-10.9	-10.8	0		94.9068	5	267.033	0.0099	-2	1000.4	1.01
1984-02-07	-2.5	1.4	-7.5	-2.6	-2.5	-1	1.1	3.6	7.2	-14.5	-14	-14	0		149.305	2	236.65	0.0222	-3	1000	1.76
1984-02-08	-2.9	3.2	-10	-2.2	-1.4	-1.3	0.9	3.6	7.2	-14.7	-14.4	-14.4	0		158.564	11	232.037	0.0142	-5	1002.7	1.09
1984-02-09	-2.5	3.7	-11.3	-1.9	-1.1	-1.5	0.7	3.5	7.2	-12.1	-11.7	-12.1	0		151.619	10	238.395	0.018	-4	1006	2.68
1984-02-10	-0.6	4.7	-7.2	-0.5	-0.2	-1.4	0.6	3.4	7.1	-11	-10.6	-10.9	0		166.666	19	240.766	0.0189	-3	1014.9	1.73
1984-02-11	0.2	5.7	-4.1	0.7	1.1	-1.1	0.7	3.3	7.1	-9.5	-9.4	-9.7	0		152.777	19	250.74	0.0149	-2	1021.8	0.56
1984-02-12	-0.2	4.2	-4.7	-0.1	-0.1	-0.9	0.8	3.3	7	-5.3	-5.2	-5.6	0		61.3422	17	289.738	0.0276	-1	1019.8	1.18
1984-02-13	0.9	4.1	-1.9	1.6	1.9	-0.7	0.9	3.3	7	-2.4	-2.1	-2.8			98.379	8	280.561	0.0159	0	1012	1
1984-02-14	1.5	5	-1.7	1.5	1.6	-0.7	1.1	3.3	6.9	-4.6	-7	-5.8			99.5364	30	281.484	0.001	0	1010.2	1.26
1984-02-15	1.5	6	-3.4	1.4	1.4	-0.1	1.7	3.2	6.8	-9.9	-11.9	-10			146.99	36	259.571	0.0141	0	1009.2	1.23
1984-02-16	-0.5	5	-6.4	0.2	0.5	0.5	2	3.3	6.8	-13.8	-12.5	-12.2			170.138	26	241.354	0.0187	0	1012.8	1.27
1984-02-17	-0.5	3.3	-3.5	-0.6	-0.6	0.2	1.7	3.3	6.8	-7.9	-6	-6.8			53.2404	19	292.453	0.0091	0	1011.2	0.86
1984-02-18	-0.6	2.5	-4.7	-0.3	-0.1	0.5	1.8	3.3	6.7	-6.8	-2.1	-5.8			190.971		240.249	-0.0288	0	1008.9	1.07
1984-02-19	0.1	5.4	-4.9	0.5	0.9	0.2	1.6	3.4	6.7	-11.6	-7.4	-10.9			182.869		242.264	0.0016	0	1016.2	1.04
1984-02-20	-2	3.5	-7.5	-1.1	-0.3	-0.2	1.5	3.4	6.7	-8.4	-4.6	-8.5			113.425		262.451	0.001	-1	1016.6	0.66
1984-02-21	0	6.3	-6.7	0.4	1	-0.4	1.3	3.4	6.6	-6.2	-2.5	-6.4			159.721	4	255.192	-0.0014	-2	1016	0.94
1984-02-22	1.2	6.7	-4.9	1.4	1.8	-0.3	1.2	3.3	6.6	-6.2	-2.2	-6.1	0		134.258	20	269.357	0.0001	-2	1020.2	1.23
1984-02-23	1.2	2.2	0.2	1.1	1.1	0	1.3	3.3	6.4	-3.6	-0.1	-3.2	11		24.3054	2	314.407	0.0338	-2	1011.7	1.41
1984-02-24	3.3	8.6	-2.4	4	4.5	1.8	2.3	3.1	5.7	-5.3	-3.7	-4.5	0		158.564	53	270.401	0.008	-1	1011.6	0.96
1984-02-25	0.3	4.9	-4.6	0.8	1.4	0.8	2.4	3.2	5.8	-6.4	-2.7	-6.1	0		89.1198	3	283.732	0.0042	-2	1020.1	0.66
1984-02-26	1.1	2.8	-0.2	0.8	0.9	0.4	2	3.3	5.7	-2.9	2.5	-2.5	22		21.9906	5	315.264	0.0237	-2	1007.7	1.24
1984-02-27	3.8	8.2	0.6	3.9	4.1	1.7	2.6	3.2	5	-6.9	-6.3	-6	0		195.601	61	259.791	0.027	1	996.1	2.16
1984-02-28	1.4	5.1	-2.2	1.1	1.2	1.2	2.7	3.3	5.1	-9.8	-9	-9.7	0		193.286	38	249.997	0.0242	-3	1005.7	2.23
1984-02-29	0.4	5.8	-6	0.5	0.7	1	2.5	3.4	5.3	-10.2	-9.6	-10.5	0		165.508	24	255.893	0.0164	-2	1007.1	1.37
1984-03-01	0.6	6.3	-6.8	0.7	0.9	1.4	2.7	3.4	5.5	-9.2	-8.3	-9.8	0		187.499	38	250.634	0.0187	-1	1011.3	0.98
1984-03-02	2.6	10.1	-5	3.1	3.5	2	3.1	3.5	5.6	-6	-4.7	-7.1	0		181.712	35	263.049	0.0136	0	1012.4	1.08
1984-03-03	2.8	10.3	-3.2	3	3.2	2.9	3.6	3.6	5.7	-5.7	-3.3	-6.4	4.5		157.406	57	272.507	0.0126	0	1012.4	1.16
1984-03-04	2.9	7.8	-1.5	2.5	2.5	4.2	4.5	3.8	5.8	-4.1	-1	-4.5	0.5		175.925	58	268.756	0.0074	2	1013.8	1.02
1984-03-05	2.4	8.1	-2.9	1.9	1.9	5	5.4	4.1	5.9	-5.7	-2.4	-5.6	0.5		200.23	62	258.403	0.0204	1	1014.4	1.09
1984-03-06	2.5	9.2	-4.5	2.7	3	3.9	5	4.4	5.9	-7.9	-4.6	-8.4	0		195.601	53	258.871	0.007	-1	1013	0.25
1984-03-07	1.4	8.8	-5.6	1.7	2.1	2.8	4.3	4.2	5.5	-8.7	-6.6	-9.2	0		189.814	43	256.456	0.0023	6	1012.4	0.55
1984-03-08	2.8	8.9	-3.4	2.8	3.1	3.8	4.9	4.7	6.2	-6.7	-6.2	-7.5	0		174.767	34	268.507	0.0195	-1	1011.6	0.93
1984-03-09	2.7	8.5	-2.8	2.7	2.9	3.7	4.8	4.8	6.3	-6.6	-5.6	-7.3	0		153.934	26	275.369	0.0144	-1	1014.1	1.22
1984-03-10	2.9	5.7	0.9	2.5	2.4	3.7	4.7	4.9	6.4	-2.9	-1	-3.5	3		41.6664	10	317.248	0.0027	-2	1003.8	1.21
1984-03-11	3.4	7.4	-1.2	3.1	3.3	3.2	4.5	5	6.5	-10	-8.7	-10.2	0		204.86	43	260.254	0.0239	-3	1001.6	2.5
1984-03-12	3.5	12.1	-5.7	4	4.4	3.2	4.2	5	6.5	-7.8	-6.6	-8.4	0		164.351	24	275.629	0.0149	-1	1007.5	1.78
1984-03-13	3.2	8.8	-2.7	2.8	2.9	2.9	4.2	5	6.6	-9.6	-8.5	-10.1	0		174.767	29	270.422	0.016	-2	1012.9	1.9
1984-03-14	0.6	3.1	-0.5	0.1	0.1	2.2	3.8	5	6.6	-6.2	-3.9	-6.7	0		33.5646	1	309.742	-0.0026	-3	1014.8	0.6304
1984-03-15	2.9	7.7	-2.8	2.5	2.6	4	4.5	4.9	6.7	-6.4	-2.8	-6.8	1		201.388	62	264.496	0.0131	3	1017.4	1
1984-03-16	2.1	3	0.5	1.7	1.6	2.7	4.5	4.9	6.6	-2	1.2	-2.6	14		26.6202	12	319.744	-0.0139	-3	1010	1.15
1984-03-17	5.8	11.3	2.5	5.4	5.4	4.5	5.2	5.1	6.7	-2	0.6	-2.4	0		101.851	29	311.093		4	998.5	1.24
1984-03-18	5.9	11.2	0.2	5.7	5.9	3.8	5.3	5.2	6.7	-8.1	-7	-8.3	0		224.536	58	269.191		-2	1007.1	2.32
1984-03-19	2.2	4.9	0.6	1.9	1.9	2.4	4.5	5.3	6.7	-5.2	-4.7	-5.7	0.5		40.509	9	315.182		-3	1015.5	1.39
1984-03-20	1.4	2.8	-1.1	1.1	1.2	1.9	3.9	5.3	6.8	-1.4	-1.1	-2.3	17.5		57.87	4	306.623		-4	1004.4	1.39
1984-03-21	2.2	8.9	-4.2	2.2	2.7	2.8	4.2	5.1	6.6	-7.2	-6.1	-7.2	0		200.23	74	264.072		1	1004.4	2.61
1984-03-22													0								1.3172
1984-03-23	1.7	7.7	-3.8	1.7	1.8	3	4.6	5.1	6.7	-10.6	-9.5	-10.3	0		234.952	56	251.159		1	1022.4	1.24
1984-03-24	4.3	8.3	0.2	3.9	3.9	4.2	5.1	5.1	6.7	-2.9	-1.5	-3.1	1		82.1754	27	312.09		1	1016.4	0.71
1984-03-25	6.5	14.2	0.1	6.4	6.4	6	6.4	5.3	6.7	-4.6	-3.4	-5	0		201.388	64	284.626		2	1010.8	1.26
1984-03-26	5.5	13.1	-0.5	5.8	6.1	5.5	6.6	5.5	6.8	-5.5	-4	-5.8	0		172.453	45	288.595		0	1015	1.17
1984-03-27	5.5	11.8	-0.1	5.1	5	5.8	6.7	5.8	6.8	-3.5	-1.4	-4	0		177.082	57	289.243		3	1017.5	1.72
1984-03-28	3	5.9	-2.7	3.2	3.2	4.6	6.5	6	6.9	-2.2	0.1	-2.7	1		65.9718	14	312.232		-3	1013.6	1.48
1984-03-29	7	16.5	-3	7.2	7.6	5.8	6.4	6.1	7	-2.1	0.1	-2.5	0		202.545	67	290.415		3	1011.6	1.44
1984-03-30	10.6	18.4	2.6	10.3	10.2	8.4	8.2	6.2	7.1	1	3	0.3	0		199.073	48	310.342		6	1011.1	1.77
1984-03-31	5.7	15.7	0.7	5.5	5.6	7	8.4	6.5	7.2	-0.1	2.2	-0.7	1		141.203	50	303.923		-1	1011.1	2.64
1984-04-01	2.2	3.5	0.8	1.8	1.7	4.3	6.6	6.8	7.2	-1.8	1.1	-2.1	4		47.4534	21	314.866		-4	1017.2	1.89
1984-04-02	4.8	9.9	0.8	4.4	4.2	5.9	7.1	6.8	7.4	-3.5	-0.7	-3.6	0		225.693	84	275.669		3	1018.1	2.13
1984-04-03	4.4	8.5		4.9	5.1	5.8	7.1	6.8	7.5	-2.2	0.4	-2.8	0		97.2216	21	310.177		-1	1021.5	0.59
1984-04-04	10	17.9	0.1	10.1	10.4	8.4	8.1	6.9	7.5	2.3	4.7	1.2	0		189.814	70	313.304		7	1015.8	0.94
1984-04-05	12.1	13.9	10.7	11.9	11.8	10.1	9.9	7.1	7.6	8.6	11.2	8.2	14		46.296	29	365.852		5	999.4	1.37
1984-04-06	12.5	19.6	6.7	12.3	12.2	11.4	11.3	7.6	7.6	0	11.2	0.1	0.5		232.637	100	311.015		6	999.5	1.23
1984-04-07	6.6	10.2	3.6	6.4	6.3	8.7	10.2	8.1	7.7	-5.9	8	-5.9	0		164.351	53	299.218		-1	1014	1.56
1984-04-08	6.5	12.6	2.5	6	1.9	7.9	9.5	8.4	7.9	-3.9	1.7	-4.3	0		173.61	50	297.956		0	1019.8	1.55
1984-04-09	4.9	10.5	-2.4	5.2	0	7.6	9	8.4	8	-3.2	2	-4	0		196.758	55	286.126		0	1025.7	1.35
1984-04-10	8.7	13.8	3.8	8.7	0	9	9.5	8.4	8.2	1.9	7.1	1.2	0		104.166	29	331.169		3	1018	0.63
1984-04-11	10	15.1	5.6	9.9	5.9	9.9	10.2	8.5	8.3	4.3	9.5	3.6	0		97.2216	31	340.628		3	1010	1.07
1984-04-12	10.5	17.3	5.8	10.2	9.4	11.4	11.2	8.7	8.4	0.8	6.1	0.2	0		232.637	76	305.582		6	1008.8	1.39
1984-04-13	8.1	13.3	1.6	8.1	7.5	10	11	9	8.5	-1.2	5.6	-1.6	0		207.175	71	299.754		3	1013.3	1.83
1984-04-14	9.2	14.7	1.9	8.9	8	10.5	11.3	9.2	8.6	-5.8	2.2	-6.1	0		260.415	83	286.675		3	1015.5	1.88
1984-04-15	9.8	16.3	1	9.8	8.9	11.1	11.2	9.4	8.8	0.4	6.4	-0.4	0		193.286	60	312.787		4	1018	1.03
1984-04-16	9.4	11.1	6.5	9.5	8.2	10	11	9.6	8.9	5.5	11.4	4.8	3		52.083	16	350.778		-1	1016.4	1
1984-04-17	9.1	13	7.4	8.7	6.6	10.8	11.2	9.7	9	4.5	10.5	4	0		140.045	70	326.72		4	1018	1.61
1984-04-18	14.7	23.3	8	14.5	12.1	13.6	12.6	9.8	9.1	7.6	13.6	6.8	0		185.184	75	345.58		10	1010.9	1.82
1984-04-19	7.2	11.4	4.4	7	6.3	9.1	11.4	10.1	9.2	1.5	3.7	1	9.5		20.8332	8	348.056		-7	1012.2	3.67
1984-04-20	10.1	17.8	4.2	9.7	9	11	11	10.2	9.4	3.9	6.7	3.4	16.5		200.23	115	317.027		9	1004.5	1.41
1984-04-21	9.7	13.3	6.3	9.4	9	11.5	12.2	10.2	9.5	2.5	5.2	1.9	0		119.212	46	333.951		1	1014.4	1.64
1984-04-22	9.1	12.2	6.6	8.8	8.5	10.5	11.5	10.4	9.6	2.5	5.2	1.8	0		89.1198	29	339.036		0	1014.3	1.66
1984-04-23	9.1	16.4	3.9	5.9	8.4	11.8	12.1	10.4	9.7	2.5	5.1	1.6	0		243.054	91	302.425		6	1013.9	1.61
1984-04-24	11.2	19.5	2.1	11.2	11.2	12.7	12.7	10.6	9.8	-0.5	2	-1.5	0		268.517	95	302.359		6	1017.1	1.12
1984-04-25	13.9	21.8	5	14.3	14.4	14.4	13.7	10.8	9.9	3.7	6	2.9	0		225.693	75	329.664		8	1020.4	1.18
1984-04-26	14.5	21	8.9	14.4	14.9	14.4	14.3	11.1	10	6.3	8.4	5.2	0		240.739	85	332.784		8	1021.8	1.43
1984-04-27	13.8	19.8	8.4	13.7	14.3	13.8	14.3	11.4	10.1	5.5	7.7	4.5	0		228.008	86	331.336		5	1017.3	1.62
1984-04-28	12.8	19.8	5.3	12.7	12.7	13.7	14.3	11.7	10.2	2.7	4.9	1.8	0		266.202	95	315.051		5	1017.1	1.78
1984-04-29	10.2	14.7	6.7	9.7	9.3	12.7	14	11.9	10.3	1.9	4.1	1.2	0		244.211	87	307.769		2	1022.1	2.97
1984-04-30	11.3	15.9	6.1	11	10.7	12.8	13.4	12.1	10.5	4.6	6.8	3.8	0		116.897	45	344.716		2	1020.2	1.39
1984-05-01	14.1	19.2	10.5	13.6	13.3	14.6	14.5	12.1	10.6	7.4	9.6	6.5	0		178.24	76	346.486		8	1013.9	2.05
1984-05-02	13	19.1	7.2	13.3	13.4	14.4	14.9	12.3	10.8	6.3		5.8	16		178.24	86	340.044		1	1000.8	2.12
1984-05-03	14	23.5	5.5	14.3	14.6	15.3	15.1	12.5	10.9	3.9		3.1	0		283.563	121	319.243		6	1003.2	1.26
1984-05-04	14.1	20.3	5.3	14.9	15	15.8	15.7	12.7	11	2.1		1.6	0		223.378	68	330.949		5	1009.1	0.79
1984-05-05	16.7	23.4	9.3	17.1	16.7	16.7	16.1	12.9	11.1	4.5		4	0		241.897	86	341.976		10	1007.6	1.17
1984-05-06	17	21.9	10	17.5	16.8	16.7	16.5	13.2	11.3	8.3		7.3	0		252.313	99	346.753		9	1006.8	1.57
1984-05-07	18.2	25	11.5	18.6	18.1	18.4	17.6	13.5	11.4	9.5		8	0		261.572	93	352.732		11	1006.1	1.08
1984-05-08	18.8	25.7	11.6	19.3	18.7	18.6	18.1	13.9	11.6	9.4	9	8.4	0		249.998	94	357.995		9	1007.8	1.3
1984-05-09	19.7	26.2	13.5	20	19.3	19.8	18.8	14.3	11.7	12	11.5	11.2	3.5		248.841	101	366.912		12	1004.2	1.42
1984-05-10	15.5	20.7	11.1	15.7	15.3	17.9	18.5	14.7	11.9	5.1	4.8	4.7	0		295.137	110	327.066		4	1009.5	1.49
1984-05-11	16.4	21.3	10.8	16.2	15.7	16.8	17.3	15	12.1	8.8	8.4	8.3	0		155.092	60	365.556		3	1013	1.94
1984-05-12	14.9	18.1	12.7	14.5	14	16.7	17.3	15	12.2	8.4	8	8.1	0		204.86	91	347.397		5	1011.2	2.74
1984-05-13	11.8	13	9.6	11.5	11.1	14.1	16	15.1	12.4	7.7	7.4	7.9	0.5		37.0368	14	368.408		-5	1010	1.79
1984-05-14	11.9	16.1	9.5	11.6	11.2	13.7	15	14.9	12.6	7.3	7.1	9	3.5		89.1198	45	356.692		0	1002	1.75
1984-05-15	11.1	14.8	7.9	10.7	10.3	13.6	14.7	14.7	12.7	4.5	4.4	6.5	0		140.045	63	339.747		1	1010.7	1.99
1984-05-16	12.1	15.5	10.2	11.9	11.6	13.6	14.7	14.5	12.8	7.2	7	9.2	9.5		71.7588	25	361.795		-1	1009.7	1.07
1984-05-17	13.4	17.6	11	13.1	12.6	15.2	15.3	14.4	12.9	6.9	7	9.2				101			7	1010.6	2.14
1984-05-18	12.9	17.3	10	12.7	12.2	15.3	15.8	14.4	12.9	5.8	5.6	7.2	0		240.739	101	328.397		6	1011.8	1.53
1984-05-19	14.1	19.5	7.4	14.1	13.8	16.2	16.2	14.5	13	6.4	6.3	9.2	0		284.72	114	326.322		8	1013.1	1.44
1984-05-20	16.4	20.6	13.5	16.1	15.6	17.2	17.1	14.7	13	6.9	6.8	11.7	0		251.156	104	344.441		8	1014.5	2.26
1984-05-21	15.2	18.7	13.4	15.1	14.6	15.6	16.5	15	13.1	6.4	6.3	11.2	0		114.583	41	367.605		-1	1016.1	2.3
1984-05-22	14.2	17.5	11.5	14	13.7	15.6	16.3	15	13.2	4.6	4.6	9.8	0		202.545	84	341.575		4	1016.4	2.5
1984-05-23	13.4	16	10.9	13.2	12.8	14.7	15.7	15	13.2	6.5	6.4	11.4	9		90.2772	38	364.209		-1	1014.6	1.83
1984-05-24	15.2	20	11.8	15	14.5	16.1	16.1	15	13.3	9.7	9.7	14.6	0.5		160.879	73	360.327		6	1013.3	1.75
1984-05-25	16	20.8	12.5	15.8	15.2	17.1	17	15	13.4	9.9	9.7	14.6	0		216.434	99	353.817		9	1015.6	1.35
1984-05-26	16.6	22.1	11.5	16.5	15.9	17.6	17.5	15.2	13.4	10.6	10.3	15.1	0		192.128	84	362.328		8	1015.3	1.25
1984-05-27	18.6	24.4	12.2	18.8	18.5	18.5	18.2	15.5	13.5	12.4	11.9	16.7	0		167.823	71	379.171		8	1011.5	1.03
1984-05-28	19.2	22.9	16.6	19.2	18.7	19	18.8	15.7	13.6	12.2	11.9	16.8	0		180.554	80	379.618		9	1006.6	1.18
1984-05-29	18.4	21.2	16.4	18.4	17.8	18.8	18.8	16	13.7	12.4	12.2	17	0		107.638	47	389.963		3	1004.6	1.58
1984-05-30	19.3	24	16.3	19.2	18.5	19.6	19.2	16.3	13.8	12.9	12.6	17.6	0		206.017	96	376.437		11	1008.3	1.43
1984-05-31	20	23.2	16.7	20	19.4	19.7	19.5	16.5	13.9	14.3	14.1	18.4	13		127.314	58	396.273		6	1009.1	1.34
1984-06-01		25.9		16.1	15.7					11.4	11.3	11.4				93			8		1.03
1984-06-02																					0.9132
1984-06-03	17.6	19.8	16.2	17.4	16.8	19.2	20	17.4	14.4	13.1	12.8	12.8	0		129.629	68	382.134		1	1006.2	2.26
1984-06-04	18.3	21.9	16.2	18.1	17.5	19.4	19.7	17.5	14.5	13.2	13	12.9	0		179.397	92	376.83		6	1013.2	2.09
1984-06-05	18.6	22.3	15.2	18.7	18.1	19.6	19.8	17.6	14.7	12.2	12	11.9	0		160.879	63	380.869		4	1017.7	1.36
1984-06-06	19.7	25.5	15.1	19.7	19.1	20.7	20.4	17.6	14.8	13.6	13.3	13.2	0		261.572	126	370.576		13	1016.5	1.1
1984-06-07	21.6	26.2	16.9	21.6	20.3	21	20.8	17.8	14.9	14.6	14.3	14.2	0		209.489	102	390.714		9	1012.6	2.41
1984-06-08	22.4	26.2	19.2	21.9	20.2	22.4	21.6	18.1	15	13.7	13.5	13.4	0		232.637	102	389.596		10	1011.7	2.08
1984-06-09	21.9	26.2	17	21.5	20.8	22.1	21.6	18.3	15.2	12.1	11.9	12	0		224.536	102	386.125		8	1013.6	1.62
1984-06-10	21.8	24.5	19.2	21.4	20.5	21.8	21.4	18.6	15.3	16.5	16.2	16.2	0		112.268	62	410.987		4	1008.6	2.43
1984-06-11	20.7	22.3	18.7	20.3	19.6	21.2	21.2	18.7	15.4	15.7	15.6	15.5	13		76.3884	36	410.949		1	1011.2	1.32
1984-06-12	21.3	25.4	18.7	21	20.5	21.4	21	18.7	15.6	15.1	14.8	14.7	0		151.619	63	400.075		6	1013.6	0.85
1984-06-13	19.5	21.6	18.1	19.2	18.8	20.4	20.7	18.7	15.7	15.8	15.5	15.6	33.5		46.296	17	409.963		-1	1012.4	0.58
1984-06-14	20.8	24.9	17.9	20.3	19.7	21.3	20.7	18.8	16.5	15.9	15.7	15.7	6		149.305	76	398.559		8	1009.4	1.23
1984-06-15	20.4	24.5	16.7	19.8	19.2	21.8	21.3	18.9	16.5	15.3	15	15	0		196.758	104	387.702		8	1010.2	1.37
1984-06-16	22.2	26.8	18.2	21.7	21.1	22.2	21.6	19	16.5	16.4	16.1	16.1	0		146.99	75	407.136		6	1007.9	1.33
1984-06-17	23.5	27.6	20.1	23.1	22.4	23	22.1	19.2	16.5	18.1	17.9	17.8	1.5		156.249	79	414.62		8	1005.5	1.7
1984-06-18	24.5	27.3	22.7	24	23.5	24.1	22.9	19.4	16.5	20.3	20.1	19.9	0.5		136.573	76	425.727		9	1003.6	1.94
1984-06-19	25	29.9	21.2	24.6	24.4	24.6	23.4	19.6	16.6	20.3	19.9	19.7	0		170.138	85	423.559		9	1000.1	0.95
1984-06-20	23.3	26.4	20.7	22.9	22.6	23.7	23.4	19.9	16.7	18.5	18.2	18.1	3		111.11	52	421.23		3	1000.6	1.25
1984-06-21	18.8	20.3	17.7	18.3	17.9	21.5	22.1	20.1	16.8	14.6	14.3	14.2	0.5		69.444	37	401.316		-3	1008.6	1.82
1984-06-22	18.6	20.5	17.3	18	17.7	20.6	21.1	20	16.9	15.4	15	15	0		49.7682	27	404.216		0	1007.4	1.01
1984-06-23	18.5	21.4	17.3	18	17.7	19.6	20.2	19.9	17.6	15.1	14.7	14.8	43.5		57.87	30	402.026		1	1003.2	1.15
1984-06-24	19.5	23.3	16.4	18.9	18.6	20.8	20.6	19.7	18.1	13.8	13.5	13.6	0		186.341	95	382.985		7	1009.6	1.47
1984-06-25	19.3	22.1	15.8	18.7	18.4	20.6	20.6	19.6	17.9	15.8	15.5	15.7	2.5		78.7032	43	402.853		2	1005	1.05
1984-06-26	17.8	19	16.8	17.3	17.1	19.6	20.3	19.6	17.8	14.2	13.9	14	6		49.7682	27	399.494		-2	1006.1	1.8
1984-06-27	18.9	22	16.8	18.3	18.1	19.7	19.8	19.6	18.3	14.8	14.5	14.7			81.018	47	399.714		3	1001.4	1.24
1984-06-28	20.7	24.4	17.5	20.1	19.8	21	20.5	19.4	18.2	15.5	15.1	15.2			141.203	76	399.052		7	1002.8	0.8
1984-06-29	19.6	21.6	17.8	19.2	18.9	20.5	20.7	19.5	18.4	15.4	15.2	15.3	23.5		67.1292		406.463		1	1002.4	0.89
1984-06-30	20.4	25.2	17.1	19.8	19.6	21.7	21.2	19.6	18.4	14.6	14.3	14.4			253.471	104	377.438		9	1008.1	1.19
1984-07-01	19.3	24.2	16.5	18.6	18.5	22	21.7	19.7	18.3	14.5	14.2	14.3			255.785		371.364		8	1011.7	1.5
1984-07-02	20.7	26.9	16	20.3	20.2	22.2	21.8	19.9	18.1	15.6	15.3	15.3			216.434		386.549		7	1009.7	0.86
1984-07-03	24.5	30.1	19	24.4	24.5	24.2	23	20	18	18.7	18.3	18.4			244.211		407.636		11	1006.1	0.76
1984-07-04	27.1	33.8	20.6	27	27.2	25.7	24.2	20.3	18	20.4	20.1	20			249.998		424.463		12	1004.9	0.82
1984-07-05	25.8	32.9	21.5	25.6	25.7	26	25	20.7	18	20.8	20.5	20.6			219.906		421.986		8	1006.7	0.79
1984-07-06	23.2	27.8	19.5	22.7	22.6	24.5	24.3	21.1	18.1	18.3	18	18.2			164.351		411.907		3	1007.4	1.62
1984-07-07	19.2	21.1	18.2	18.8	18.8	21.8	22.7	21.3	18.2	15.1	15	15.1			59.0274		405.676		-4	1010.7	1.55
1984-07-08	19.3	20.4	18.2	18.8	18.8	21	21.6	21.2	18.3	16.3	16.1	16.4			52.083		407.884		-1	1007.6	0.91
1984-07-09	21.4	25.2	19.1	20.9	20.8	22.2	22	21	18.7	17.6	17.3	17.4			124.999		407.453		6	1002.7	0.97
1984-07-10	21.1	24.4	18.6	20.6	20.5	22.3	22.2	20.8	18.7	16.2	16	16			155.092		399.354		5	1003.1	1.53
1984-07-11	22.6	26.4	19.6	22.2	22.1	23	22.5	20.8	18.6	18.6	18.3	18.6			156.249		410.024		7	1003.5	0.87
1984-07-12	22.4	26.2	20.3	21.8	21.8	23.5	23.1	20.9	18.6	18.4	18.2	18.4			186.341		404.004		8	1004.2	1.45
1984-07-13	23.9	26.7	20.8	23.5	23.5	23.7	23.2	21.1	18.6	20.4	20.2	20.3			109.953		426.213		6	999.1	1.43
1984-07-14	26.2	29.6	22.8	25.8	25.8	25	24	21.2	18.6	21.1	20.7	20.7			153.934		433.536		11	996.2	1.21
1984-07-15	26.2	30.7	24	25.8	25.8	25.7	24.7	21.4	18.7	22.5	22	22.3			146.99		436.259		12	999.5	1.15
1984-07-16	26.7	30.2	23.4	26.3	26.4	26.2	25.2	21.6	18.7	21.2	20.8	21			195.601	139	430.713		8	1002.9	1.13
1984-07-17	26.3	30.4	23.2	25.9	26.1	26.4	25.5	21.9	18.8	20.7	20.4	20.6			233.795	158	422.287		8	1003.7	1.06
1984-07-18	25.7	29.4	23.4	25.3	25.3	26.5	25.7	22.1	18.9	20.6	20.2	20.5			248.841	179	416.635		9	1003.3	1.41
1984-07-19	24.9	27.3	23.3	24.7	24.7	25.8	25.4	22.3	19	21.6	21.3	21.6	2.5		113.425	86	432.421		4	1003.3	1.38
1984-07-20	25	28.5	23	24.8	24.8	25.8	25.3	22.5	19.1	20.8	20.6	20.9	4		186.341	142	421.59		7	1004.6	1.55
1984-07-21	25.1	28.8	22.9	25	25	25.9	25.4	22.5	19.1	20.9	20.7	20.9	1.5			124			5	1005.2	1.2
1984-07-22	24.6	28.2	22	24.4	24.4	26	25.5	22.6	19.2	19	18.8	19.1	0			160			6	1006.1	1.43
1984-07-23	23.9	27	20.9	23.7	23.7	25	25	22.7	19.3	18.8	18.5	18.7	0		171.295	118	414.755		3	1005.6	1.29
1984-07-24	24.7	28.9	19.6	24.7	24.7	25.3	24.9	22.7	19.4	19.8	19.5	19.6	0		206.017	138	415.326		6	1004	1.01
1984-07-25	26.5	30.5	22.4	26.4	26.4	26.5	25.7	22.7	19.5	21.1	20.8	21	0		221.063	152	425.476		7	1003.4	0.86
1984-07-26	25.6	30	22.5	25.5	25.5	26.6	26	22.9	19.6	20.1	19.8	20	0		267.359	175	412.088		7	1003.6	1.2
1984-07-27	24.9	28.5	20.7	24.9	24.9	26.1	25.7	23	19.7	19.7	19.5	19.7	0		196.758	133	417.499		4	1004.9	1.03
1984-07-28	25	27	22.4	25	24.9	25.7	25.4	23.1	19.8	21.9	21.5	21.8	2		98.379	61	435.252		3	1007.4	0.84
1984-07-29	26.7	30.6	23.7	26.6	26.6	26.7	25.9	23.1	19.8	21.9	21.6	21.9	0		212.962	144	429.059		7	1008.7	1.02
1984-07-30	25.9	30	22.3	25.8	25.8	26.6	26	23.2	19.9	20.6	20.3	20.6	0			170			7	1008.7	0.96
1984-07-31	26.4	32	21.7	26.5	26.6	26.9	26.2	23.3	20	21	20.7	21	0		211.804	140	425.75		7	1007.7	0.74
1984-08-01	26.9	32.3	21.9	27.2	27.4	26.9	26.4	23.3	20	20.2	19.9	20.2	0		231.48	155	424.243		6	1007.5	0.76
1984-08-02	26.8	32.5	22.4	26.8	26.9	27.2	26.6	23.5	20.1	20.8	20.7	21.2	15		214.119	149	427.183		5	1007.1	0.81
1984-08-03	26	31.4	21.8	26	26.2	26.8	26.4	23.6	20.2	20.5	20.4	20.9	0		190.971	129	425.413		4	1007.3	0.71
1984-08-04	26.4	31.3	21.6	26.4	26.5	27	26.5	23.7	20.2	20.8	20.6	20.8	0		215.276	137	424.625		4	1008.4	0.79
1984-08-05	27.3	32.5	22.6	27.4	27.4	27.1	26.6	23.7	20.3	21.5	21.2	21.4	0		228.008	147	429.208		5	1008.6	0.78
1984-08-06	27.8	33.3	22.5	28.1	28.3	27.3	26.7	23.8	20.4	19.5	18.5	15.7	1.5		243.054	161	425.805		5	1007.7	0.7
1984-08-07	28.3	34.1	23.1	28.3	28.4	27.8	27.1	23.8	20.5	19.8	20.4	13.5	13.5		237.267	158	430.02		6	1007.7	0.92
1984-08-08	27.2	31	23.2	27.1	27.1	27.7	27.2	24	20.5	20.7	20.8	19.8	0		211.804	147	429.16		5	1008.5	1.03
1984-08-09	26.9	32.5	21.9	26.8	26.8	27.5	27	24.1	20.6	19.6	19.5	19.6	0		222.221	150	423.792		4	1008.5	0.76
1984-08-10	26.4	31.1	23.8	26.5	26.6	27.2	26.9	24.1	20.7	20.9	20.9	20	0.5		137.731	91	435.878		2	1008.1	0.54
1984-08-11	27.3	32.2	22.3	27.2	27.3	27.2	26.7	24.1	20.8	20.8	20.8	20	0		188.656	121	433.039		4	1007.4	0.87
1984-08-12	28.1	33.5	24.2	27.9	27.8	27.8	27.1	24.1	20.9	22	21.7	19.8	0		208.332	139	436.771		6	1006	0.89
1984-08-13	26.5	30.2	24.2	26.3	26.2	27.5	27.1	24.3	20.9	22.1	21.9	17.4	0		206.017	137	428.038		4	1008.4	1.55
1984-08-14	27.5	33	23.4	27.2	27.2	27.9	27.3	24.3	20.9	20.1	19.9	17.5	0		251.156	157	423.308		5	1009.6	1.01
1984-08-15	27.9	33.7	23.4	27.8	27.8	27.7	27.2	24.4	21	20.1	20	18	0		240.739	149	427.001		5	1010	1.06
1984-08-16	28	34	23.3	27.8	27.8	27.8	27.2	24.4	21.1	20.8	20.6	19.2	0			130			4	1011	1.04
1984-08-17	27.8	33.3	23.5	27.9	27.9	27.8	27.3	24.5	21.1	20.6	20.3	19	0		228.008	141	429.171		4	1012.2	0.71
1984-08-18	27.4	33.2	22.7	27.5	27.6	27.3	27	24.5	21.2	20.5	20.1	18.9	0			135			4	1011.6	0.72
1984-08-19	27.2	33.3	22	27.3	27.5	27.3	26.9	24.5	21.3	20.4	19.8	18.7	0		238.424	146	423.477		5	1009.5	0.86
1984-08-20	27.2	32.6	22.4	27.1	27.1	27.6	27.1	24.5	21.3	20.6	20.1	19	0		236.11	150	424.033		6	1007.5	0.98
1984-08-21	27	30.8	24.9	26.9	26.8	27.3	26.9	24.5	21.4	22.6	22.2	20.9	1		137.731	95	440.536		3	1002.7	2.19
1984-08-22	27.9	30.6	26.4	27.9	27.8	27.2	26.9	24.6	21.4	22.3	22	20.3	0.5		162.036	110	441.576		3	996.9	3.79
1984-08-23	27.7	34.1	20.5	28	28.1	26.9	26.8	24.6	21.4	17.7	17.5	16	0		203.702	112	425.973		2	999.4	1.3
1984-08-24	22.2	26	20.4	22.3	22.2	24.8	25.6	24.5	21.5	14.3	14.3	12.8	0		159.721	103	399.115		0	1009.4	1.5
1984-08-25	22.6	26.7	18.9	22.5	22.4	24.5	24.9	24.3	21.5	15.6	15.4	13.8	0		162.036	91	402.371		1	1013.1	0.75
1984-08-26	24.7	31.3	18.2	24.6	24.6	25	24.9	24	21.6	18.1	17.5	15.9	0		209.489	126	408.823		4	1012	0.77
1984-08-27	24.8	28.5	20.9	25.3	25.6	25.3	25.2	23.9	21.6	20.8	20.3	18.7	0		81.018	40	434.644		2	1005.9	0.73
1984-08-28	25.3	31.8	18.9	26	26.5	25	25	23.8	21.5	16.6	16.3	14.6	0		217.591	126	407.504		2	1005.8	0.56
1984-08-29	22.8	27.3	19.9	22.7	22.6	24.4	24.8	23.8	21.5	15.5	15.4	13.7	0		199.073	111	395.485		1	1008.4	1.67
1984-08-30	20.6	21.4	20	20.7	20.6	23	23.8	23.6	21.5	15.6	15.6	14	0		49.7682	30	413.992		-2	1008.7	0.99
1984-08-31	25.1	31.7	20	25.1	25.1	24.4	24.1	23.4	21.5	18	17.8	16	0		180.554	113	415.042		5	1007.4	0.69
1984-09-01	25.2	29.8	22.5	25.1	25.1	25.2	24.8	23.3	21.5	20.1	20	18	0		164.351	104	421.498		4	1008	1.32
1984-09-02	27.5	34.8	23.2	27.4	27.3	26.2	25.5	23.3	21.4	20.8	20.5	18.4	0		204.86	133	428.827		6	1002.1	1.03
1984-09-03	25.8	32.1	22.3	26	26	26	25.7	23.5	21.4	20.2	20	18.3	0		224.536	150	414.742		4	1000.7	1.71
1984-09-04	23.3	29.4	20.9	23.2	23	25.1	25.2	23.6	21.4	18.6	18.5	17.8	0		141.203	98	412.371		3	1002.9	1.97
1984-09-05	21	24.4	19.6	21	20.9	23.4	24.2	23.6	21.4	16.8	16.7	16.4			77.5458	48	410.396		-1	1006.8	1.09
1984-09-06	21.6	27.2	17	21.8	21.9	22.9	23.6	23.4	21.4	13	12.8	12.6			210.647	124	381.379		-1	1012.7	0.83
1984-09-07	20.1	25.5	14.3	20.4	20.6	21.7	22.7	23.2	21.4	13.3	13.1	12.8			156.249	73	385.337		-2	1014.6	0.74
1984-09-08	20.3	24.9	14.4	20.6	21.1	21.3	22.2	22.9	21.4	14.9	14.5	14.1			114.583	47	396.916		-2	1011.2	0.8
1984-09-09	21.8	24.9	18.3	21.7	21.5	22.4	22.5	22.6	21.4	17.2	17.1	16.8			89.1198	52	412.292		2	1003.4	0.72
1984-09-10	23.5	30.4	19.9	23.3	23.2	23.9	23.5	22.5	21.3	18.4	18.3	18.1			157.406	100	409.204		4	998	1.23
1984-09-11	22.4	25.9	20.2	22.3	22.3	23.2	23.4	22.5	21.2	16.2	16.1	16.1			112.268	65	409.594		1	1002.8	0.86
1984-09-12	21.4	25	19.1	21.5	21.4	22.5	23	22.5	21.2	13.3	13.2	13.3			120.37	63	399.401		0	1007.1	0.68
1984-09-13	21.2	25.7	15.9	21.4	21.5	22	22.4	22.5	21.2	14.4	14.5	14.4			133.101	70	396.412		1	1010.8	0.96
1984-09-14	21.8	23.5	20.4	21.8	21.7	22.7	22.7	22.3	21.1	18	18	17.9			54.3978	31	419.794		1	1010.6	0.69
1984-09-15	21.7	24.6	19.3	21.6	21.4	22.6	22.7	22.3	21.1	16.3	16.1	15.9			76.3884	44	413.389		1	1014.8	1.07
1984-09-16	19.8	21	18.6	19.8	19.6	21.7	22.3	22.2	21	16.9	16.9	16.7			33.5646	16	412.641		-2	1011.9	0.66
1984-09-17	21.2	25.6	18.2	21	20.9	22.1	22.3	22.1	21	15.7	15.7	15.5			148.147	77	393.899		2	1009.3	1.14
1984-09-18	20.1	23.5	16.2	20.4	20.5	21.4	21.9	22	20.9	15.1	15.1	15			90.2772	41	400.085		-1	1009.1	0.58
1984-09-19		19.6														-2			-3		0.37
1984-09-20	20.9	24.4	18.6	20.9	20.7	21.9	22	21.7	20.9	16.4	16.5	17			92.592	54	404.746		1	1014	0.72
1984-09-21	21.1	24.2	18.9	21.3	21.1	21.9	22.1	21.7	20.8	15.9	16	16.9			104.166	52	402.672		1	1016	0.77
1984-09-22	20.3	25.1	15	20.6	20.5	21.4	21.9	21.6	20.8	13.5	13.6	13.9			187.499	87	376.441		-1	1015.5	1.36
1984-09-23	18.7	24.7	12.6	19.1	19.2	19.8	20.8	21.6	20.7	11.5	11.6	11.2			187.499	79	364.903		-4	1012.6	1.1
1984-09-24	18.4	24.8	12.5	18.6	18.6	19.5	20.4	21.3	20.7	11.3	11.3	10.8			202.545	83	359.247		-3	1009.9	0.79
1984-09-25	19.2	27.2	11.5	20.3	20.6	19.3	20.1	21.1	20.6	12	12	11.3			179.397	83	369.336		-1	1006.9	0.49
1984-09-26	19.5	22	15.6	19.8	19.8	19.7	20.3	20.9	20.6	11.4	11.5	11.1			98.379	45	390.663		-1	1011.7	1.34
1984-09-27	15.8	22.1	9.4	16.6	16.7	18.1	19.5	20.7	20.5	6.7	6.9	6.6			192.128	81	341.609		-6	1018.5	0.65
1984-09-28	16.6	24.1	9	17.6	18.4	17.6	18.8	20.5	20.4	7.4	7.8	7.2	0		190.971	77	346.323		-4	1018.2	0.62
1984-09-29	18.1	24.3	10.4	19	19.5	17.8	18.6	20.2	20.3	13	12.8	11.8	0		104.166	44	382.525		-1	1013.7	0.57
1984-09-30	21.7	27.9	16.2	22.1	21.9	19.8	19.6	20	20.2	15	14.8	14.1	0		134.258	69	396.002		4	1009	0.95
1984-10-01	21	24.8	17.4	21.4	21	20.2	20.3	20	20.1	11.5	11.6	11.2	0		151.619	68	383.139		1	1011.5	1.23
1984-10-02	21.5	26.1	17.7	21.9	21.4	20.4	20.4	20	20	13.8	13.8	13.3	0		119.212	60	396.864		3	1012.4	0.98
1984-10-03	23.8	31.1	18.4	24.1	23.6	21.9	21.2	20.1	20	16.9	16.7	16.1	0		118.055	66	412.897		4	1001	1.69
1984-10-04	15.9	17.5	14.4	16.1	15.7	19	20.3	20.3	19.9	10.4	10.5	9.9			18.5184	4	393.34		-5	1007.9	1.05
1984-10-05	16.4	21.4	10.3	16.8	16.6	18.1	19.1	20.2	19.9	10.1	10	9.3	3		146.99	58	358.017		-3	1011.1	0.82
1984-10-06	14.2	17.9	11.2	15.1	15.1	17	18.5	20	19.8	4.7	5.2	5.6	0		106.481	46	353.565		-4	1016.7	0.79
1984-10-07	14.4	17.4	11.8	14.6	14.4	16.1	17.5	19.7	19.8	4.9	5	4.6	0		103.009	35	355.571		-4	1018.1	1.61
1984-10-08	13.4	16.9	8.1	13.5	13.3	15.2	16.8	19.3	19.7	3.4	3.5	3	0		104.166	26	348.929		-6	1020.7	1.24
1984-10-09	13.2	17.6	8.4	13.4	13.2	15.1	16.5	19	19.6	3.6	3.7	3.2	0		123.842	38	341.415		-4	1020.7	1.07
1984-10-10	14.7	19.5	9.6	14.9	14.6	15.5	16.4	18.7	19.5	6.9	6.9	6.4	0		93.7494	40	360.793		-1	1020.4	0.98
1984-10-11	16.1	17.9	13.7	16.5	16.2	16.3	16.9	18.4	19.4	10.1	10.2	9.7	5.5		89.1198	26	371.513		-1	1020.8	1.08
1984-10-12	17.8	19.1	16.4	18	17.8	17.1	17.3	18.3	19.3	13.8	13.8	13.2	13.5		48.6108	13	394.618		1	1014.3	2.49
1984-10-13	19.8	25.1	16.2	19.8	19.8	18.7	18.3	18.3	19.2	14.2	14	13.7	19		135.416	61	380.986		4	1002.4	1.14
1984-10-14	19.2	24.8	14.9	19.2	19.4	18.6	18.7	18.4	19.1	10.5	10.3	10.2	0		175.925	74	361.216		-1	1006.9	0.89
1984-10-15	14.2	20.9	7.7	15.1	15.4	16.4	17.7	18.5	19	4.2	4.3	4.5	0		178.24	60	327.348		-8	1019.5	0.79
1984-10-16	13.9	18.1	7.1	14.2	14.7	15.1	16.3	18.4	18.9	6.6	6.6	6.3	0		100.694	35	352.72		-3	1018.2	0.58
1984-10-17	15.9	19.3	13.9	16.1	16.2	16.7	17	18.1	18.8	11.5	11.5	11.5	1.5		57.87	27	379.776		1	1005.3	0.66
1984-10-18	17.3	23.5	11.7	17.6	18.1	16.5	17	18	18.8	10.3	10.1	9.9	0		158.564	58	354.997		-2	1013.4	0.91
1984-10-19	15.2	16.4	13.2	15.2	15.3	16.3	17	17.9	18.7	11.1	11.1	10.9	14		24.3054	4	386.873		-2	1020	1.38
1984-10-20	14.2	16.2	12.8	14	14	16.2	16.7	17.8	18.6	10.9	10.8	10.7	6.5		47.4534	26	373.604		-1	1012.5	0.77
1984-10-21	14	20.9	7.2	14.4	14.6	16.3	17	17.7	18.5	8	8.1	8.3	1		129.629	55	343.406		-3	1003.7	0.85
1984-10-22	11.7	19	4.9	12.2	12.6	13.8	15.5	17.6	18.4	3.3	3.3	3.3	0		153.934	48	319.183		-8	1009.4	0.6
1984-10-23	12.1	19.5	6.7	13	13.6	13.5	14.8	17.4	18.4	7.5	7.2	6.6	0		120.37	40	336.198		-5	1011.3	0.5
1984-10-24	14.5	21.4	7.5	14.4	14.7	14.3	14.9	17	18.3	8.2	7.9	7.9	0		145.832	47	340.017		-1	1014.8	1.08
1984-10-25	14.2	18.4	9.3	15	15.7	14.9	15.6	16.8	18.2	10	9.8	9.1	0		63.657	11	366.845		-2	1012.3	0.54
1984-10-26	13.8	20.9	6.7	14	14.8	13.8	14.8	16.8	18.1	7.1	6.7	6.6	0		137.731	46	337.051		-3	1013.5	1.04
1984-10-27	15.5	20	13	15.8	16.2	15.3	15.6	16.6	18	9.4	9.1	9	0		91.4346	38	362.871		0	1007.8	0.45
1984-10-28	15.1	19.3	11.1	15	15.3	15.1	15.6	16.6	17.9	6.6	6.5	6.5	0		109.953	40	351.312		-1	1004.7	0.99
1984-10-29	11.5	14.1	6.6	11.8	11.9	13.9	15.2	16.6	17.8	4.8	4.9	4.9	1		52.083	8	354.101		-6	1004.7	1.1
1984-10-30	9	16.7	1	10.1	10.4	12.3	14	16.4	17.7	0.6	0.8	0.9	0		141.203	42	304.949		-10	1007.4	0.67
1984-10-31	8.1	16.5	-0.9	9.6	10.4	10.2	12.3	16.1	17.6	-1.4	-1.2	-1.3	0		158.564	46	292.364		-11	1014.8	0.76
1984-11-01	9.4	14.7	5.7	9.8	10	11.4	12.6	15.7	17.5	2	2.2	2.3	0		77.5458	19	331.568		-4	1014.3	0.63
1984-11-02	6.9	16.1	0.5	8.4	9.5	9.9	12	15.4	17.4	-0.1	0	-0.4	0		91.4346	10	312.839		-12	1011.3	0.65
1984-11-03	8.5	15.7	-0.4	9.2	9.8	9.1	10.9	15	17.3	-0.8	-0.7	-0.9	0		148.147	40	297.006		-8	1018.7	0.6
1984-11-04	11.4	17.7	5	11.6	11.8	11	11.7	14.6	17.1	4.8	4.6	4.3	0		126.157	34	323.632		-3	1023	0.68
1984-11-05	11.9	21	5.5	12.8	13.3	11.4	12.2	14.4	16.9	6.8	6.5	5.8	0		127.314	38	327.374		-4	1020.4	0.63
1984-11-06	11.4	19.2	4.6	12.3	13.2	11	12	14.3	16.8	6.5	5.8	5	0		104.166	20	332.648		-5	1020.5	0.65
1984-11-07	10.3	20.4	4.8	11.9	13.1	10.8	11.9	14.2	16.6	6.3	5.9	4.7	0		111.11	32	324.341		-6	1013.9	0.47
1984-11-08	12.4	21.8	5.7	13.3	14	11.2	12	14.1	16.5	5.1	5	4.7	0		120.37	33	328.777		-3	1010.7	0.65
1984-11-09	12.6	21.6	5	13.8	14.5	10.9	11.8	14	16.4	5.3	5.1	4.8	0		119.212	32	329.957		-4	1011.3	0.54
1984-11-10	13.1	15.2	11	12.9	12.9	12	12.4	13.9	16.2	2.7	2.7	2.5	0		70.6014	25	350.114		1	1018.6	1.62
1984-11-11	12.9	16.6	10	13	13	12.7	12.9	13.9	16.1	6.5	6.4	6.1	0		48.6108	20	360.799		1	1007.1	0.62
1984-11-12	10.4	15.4	4.1	11.4	11.9	11.4	12.6	14	16	4.7	4.5	3.7	0		48.6108	7	347.387		-5	1012.8	0.69
1984-11-13	7.2	13.3	2.3	8	8.6	9.7	11.4	13.9	15.9	-0.9	-0.8	-1.2	0		113.425	31	300.35		-9	1020	0.53
1984-11-14	7.4	13.6	-0.9	7.6	8	8.8	10.4	13.7	15.8	-0.1	-0.2	-0.8	0		119.212	33	299.163		-7	1023.2	0.64
1984-11-15	9.2	11.2	8.1	9.1	9	10.4	11.2	13.4	15.8	5.2	5.2	5	14		18.5184	7	355.042		-1	1012.5	0.74
1984-11-16	11.4	15.6	6.5	11.6	11.8	11.3	11.8	13.2	15.7	5.6	5.8	5.5	7		92.592	25	332.732		-2	1016.6	0.82
1984-11-17	7.8	16.1		8.4	8.8					4	3.8	3.3			86.805	30			0		0.32
1984-11-18	10	14.5	4	10	10.2	9.9	10.8	13.1	15.4	4.5	4.4	3.8	0		60.1848	14	338.806		-2	1015.4	1.47
1984-11-19	8.9	11	7.1	8.7	8.7	10.3	11.1	12.9	15.3	3.2	3.2	2.8	3.5		12.7314	0	355.947		-3	1013.7	1.52
1984-11-20	5.4	6.6	4.3	5.3	5.3	9	10.4	12.8	15.2	1.5	1.8	1.4	7		20.8332	-1	334.311		-7	1014.4	1.42
1984-11-21	5.3	10.8		6.2	7	7.9	9.5	12.6	15.1	0	0.1	-2.8	0		72.9162	5	307.797		-9	1020.4	0.58
1984-11-22	4.7	13.7	-0.6	6	7	6.5	8.5	12.4	15	-1	-0.8	-1.8	0		123.842	20	281.582		-12	1022.8	0.57
1984-11-23	4.5	12.9	-3.5	5.7	6.3	5.7	7.6	12	14.9	-1.5	-1.3	-2.8	0		119.212	24	281.854		-10	1025.8	0.48
1984-11-24	8.2	12.6	3.4	8.2	8.4	7.7	8.4	11.6	14.7	3.1	3	1.8	0		38.1942	12	338.891		1	1016.1	0.63
1984-11-25	8.2	13.8	2.7	8.5	8.9	8.7	9.3	11.4	14.6	-1	-0.8	-1.8	0		87.9624	12	311.433		-4	1017	0.79
1984-11-26	2.2	9.1	-3.8	3.7	4.9	5.5	7.9	11.4	14.4	-5.2	-4.9	-6.1	0		121.527	17	266.969		-14	1022.3	0.64
1984-11-27	6.2	15.2	-0.8	6.2	6.6	6	7.3	11.1	14.3	-4.6	-4.4	-5.2	0		106.481	7	289.992		-6	1011.4	1.28
1984-11-28	3.4	9.6	-3.9	4.8	5.5	4.8	6.9	10.8	14.1	-6.4	-6.1	-6.8	0		118.055	16	271.447		-11	1019.5	0.58
1984-11-29	3	12.1	-2.8	4.2	5.2	4.6	6.5	10.5	14	-2.9	-2.9	-4.4	0		106.481	18	277.744		-9	1021.1	0.62
1984-11-30	4.4	15.1	-3.1	6.1	7.4	4.4	6.1	10.2	13.9	-2.5	-2.9	-3.9	0		115.74	21	279.12		-8	1020.1	0.55
1984-12-01	4.1	8.4	-2.6	4.4	5.2	4.4	5.9	9.9	13.7	0.5	0.2	-0.9	5		37.0368	0	318.273		-4	1012.1	0.59
1984-12-02	8.6	15.6	2.5	8.9	9.3	6.5	7.1	9.7	13.5	-0.4	-0.1	-1	1.5		109.953	14	300.354		-3	1004.1	0.92
1984-12-03	6.5	13.7	-0.4	7.9	8.5	5.8	7	9.6	13.4	-2.6	-2.6	-3.6	0		111.11	9	288.622		-7	1017.7	0.68
1984-12-04	4.1	13.2	-2	5.6	6.8	4.7	6.2	9.6	13.2	-0.9	-1	-2.5	0		104.166	16	283.422		-8	1022.1	0.55
1984-12-05	7.8	16.1	-0.3	8.6	9.1	6.1	6.7	9.4	13.1	2.9	2.6	1.2	0		91.4346	11	308.264		1	1012.6	0.8
1984-12-06	6.7	9.2	4.2	6.9	7.4	6.7	7.5	9.3	12.9	-1.5	-1.3	-1.9	0		42.8238	10	325.679		-3	1014.2	1.6
1984-12-07	4.7	8.8	-0.6	5	5.2	6.3	7.4	9.4	12.8	-5.7	-5.5	-6.4	0		107.638	13	278.978		-6	1023	0.74
1984-12-08	2.1	10	-4.5	3.7	5.2	4.5	6.2	9.4	12.7	-3.8	-3.7	-5	0		107.638	7	269.976		-7	1024.5	0.51
1984-12-09	3.4	13.1	-3.1	4.9	5.7	4.7	6.1	9.2	12.6	-1.1	-1.4	-3.3	0		98.379	3	281.735		-5	1023	0.52
1984-12-10	7.5	14.1	0.5	7.9	8.5	6.4	6.7	9	12.5	3.2	2.9	1.5	0		86.805	18	308.398		1	1021.9	0.62
1984-12-11	9.2	12.8	5.5	9.1	9.4	7.8	7.8	9	12.4	5.8	5.8	4.8	25		35.8794	6	343.788		4	1013.4	0.79
1984-12-12	13	17.7	9.2	12.9	13	10.6	9.7	9.1	12.2	7.7	7.6	6.7	2.5		94.9068	29	333.582		7	1002.3	1.15
1984-12-13	10.3	15	6.3	10.8	11.3	9.1	9.7	9.5	12	-0.7	-0.6	-1.3	0		109.953	1	304.105		-6	1012.8	0.9
1984-12-14	8.1	13.4	3	8.9	9.5	8.3	9	9.7	12	2.4	2.4	1.4	0		45.1386	-6	331.585		-3	1010.1	0.55
1984-12-15	4.7	7.9	2	5.1	5.5	6.9	8.1	9.8	12	-4.7	-4.3	-4.9	0		48.6108	0	310.652		-7	1014.1	0.69
1984-12-16	3.2	6.5	-0.1	3.1	3.3	6	7.3	9.6	12	-4.9	-4.4	-4.9	8.5		45.1386	6	305.907		-5	1015.7	0.77
1984-12-17	5.1	9.1	1.8	5.1	5.3	6.2	7.1	9.3	11.9	0.2	0.4	-0.3	13.5		92.592	29	290.994		-1	1007.8	1.05
1984-12-18	5.1	9.8	1.8	5.1	5.5	6.5	7.3	9.1	11.7	1.7	1.9	0.8	1.5		40.509	-6	319.541		-4	1002.3	0.94
1984-12-19	4.2	9.5	-1.7	4.8	5.2	5.5	6.9	9.1	11.7	-5.8	-5.5	-6.1	0		107.638	-8	273.967		-8	1010.5	1.03
1984-12-20	2.2	7.7	-2.3	2.8	3.5	4.5	6	8.9	11.6	-5.7	-5.3	-5.8	0		92.592	4	274.005		-5	1016.4	0.46
1984-12-21	1.5	6.6	-1.8	2.1	3	4.3	5.7	8.7	11.6	-3.9	-3.7	-4.6	0		48.6108	-10	296.425		-6	1010.8	0.63
1984-12-22	4.4	11.4	-0.5	5	5.6	4.9	5.7	8.4	11.6	-2.7	-2.6	-3.3	0		85.6476	1	288.615		-2	1004.6	0.84
1984-12-23	1	6.7	-4.4	2.4	3.2	4.3	5.7	8.3	11.5	-4.9	-4.7	-6	0		71.7588	-4	280.594		-7	1007.7	0.62
1984-12-24	0.4	8.3	-6.2	1.8	2.5	2.4	4.5	8.2	11.4	-8.4	-8.1	-9.1	0		114.583	-8	253.314		-8	1005.1	0.87
1984-12-25	-1	4.5	-6.2	-0.3	0.1	1.8	3.9	7.9	11.3	-13.4	-13	-13.5	0		114.583	-11	244.847		-8	1011.8	1.14
1984-12-26	-2.5	5.4	-8.8	-1.1	0	1	3.2	7.5	11.2	-9.4	-9.2	-10.3	0		90.2772	-9	254.395		-7	1012.4	0.64
1984-12-27	-1.3	6.9	-6.5	0.1	1.2	1.1	3	7.2	11.1	-8	-7.9	-9.1	0		93.7494	-7	257.898		-6	1010.8	0.7
1984-12-28	-0.3	7.5	-6.8	0.2	0.8	1.2	2.9	6.9	11	-7.9	-7.9	-9	0		104.166	1	256.302		-4	1005.6	0.7
1984-12-29	-0.4	6	-7.2	0.5	1.1	1.7	3.1	6.7	10.8	-9.4	-9.2	-9.9	0		108.796	2	252.587		-4	1007.4	0.66
1984-12-30	-1.2	7.3	-7.5	0.2	1	1.3	3	6.5	10.7	-9.1	-9.2	-10.1	0		109.953	-4	249.375		-4	1013.6	0.73
1984-12-31	-1.2	8.6	-8.4	0.6	1.7	1	2.7	6.4	10.5	-7.5	-7.6	-8.9	0		112.268	-2	249.448		-3	1016.4	0.52
1985-01-01	0.3	8.2	-6.7	1.5	2.3	1.1	2.7	6.2	10.4	-6.4	-6.7	-7.9	0		116.897	3	253.678		-3	1019.5	0.54
1985-01-02	0	8.9	-7.2	1.1	1.7	1.4	2.8	6	10.3	-8.3	-8.3	-9.2	0		116.897	3	251.223		-2	1020.7	0.74
1985-01-03	1	5	-1.5	1.3	1.5	2.2	3.1	5.9	10.1	-4.3	-4.5	-5.6	0		38.1942	2	300.307		-2	1015	0.61
1985-01-04	1.1	7.5	-3.5	1.7	2.4	2.3	3.3	5.9	10	-6.8	-6.5	-7.6	0		89.1198	4	270.84		-3	1009.1	0.53
1985-01-05	-1.9	4.5	-8	-0.6	0	1.1	2.9	5.8	9.9	-10.4	-10.3	-11.2	0		99.5364	-9	251.874		-4	1012.1	0.58
1985-01-06	-2.3	5	-9.2	-0.9	-0.2	0.7	2.4	5.8	9.8	-10.6	-10.3	-11.2	0		115.74	3	242.308		-3	1013.3	0.46
1985-01-07	-2.4	6.6	-9.7	-0.6	0.3	0.4	2.2	5.6	9.7	-11.4	-11.1	-12	0		119.212	0	239.947		-4	1016.3	0.6
1985-01-08	-1.5	6.7	-8.8	-0.3	0.7	0.3	2	5.5	9.6	-10.4	-10.3	-11.1	0		115.74	3	245.773		-4	1018.6	0.62
1985-01-09	-0.8	8.1	-7.8	1	2.1	0.5	2	5.3	9.5	-7	-7.6	-9.3	0		98.379	-3	259.428		-3	1016.9	0.54
1985-01-10	1.5	9.1	-3.5	2.8	3.7	1.2	2.3	5.2	9.4	-3.1	-3.6	-5.1	0		70.6014	4	285.466		-1	1009.1	0.63
1985-01-11	3.6	9.3	-4.4	4.2	4.6	1.8	2.6	5.1	9.3	-3.5	-3.6	-4.9	0		94.9068	9	281.382		-2	1010.8	1.11
1985-01-12	2.6	5	-0.9	2.6	2.7	3.2	3.6	5.1	9.1	-1.9	-2.3	-3.3	0		30.0924	-2	313.507		0	1010.7	1.14
1985-01-13	1.5	9.2	-2.5	2	2.5	2.6	3.4	5.2	9.1	-5.1	-5.1	-6.1	0		82.1754	12	278.642		-1	1005.3	0.97
1985-01-14	1	6.3	-7.3	0.9	1.2	1.9	3.2	5.3	9	-11.9	-11.7	-12.5	0		120.37	-10	253.033		-3	1005.5	1.53
1985-01-15	-2.4	5	-9.9	-1.3	-0.4	0.7	2.5	5.3	8.9	-10.3	-10.2	-11.6	0		121.527	0	241.643		-4	1015.3	0.82
1985-01-16	2	10.8	-6.7	2.6	3.1	1.1	2.4	5.2	8.9	-9.1	-9.1	-10	0		112.268	-2	263.469		-3	1008.5	1.08
1985-01-17	-0.2	5.5	-7	0.5	0.8	1	2.4	5	8.8	-13.7	-13.6	-14.3	0		124.999	-1	246.33		-3	1015.5	1.26
1985-01-18	-2.8	3.9	-10.9	-1.8	-1	0.2	1.9	5	8.7	-11.7	-11.8	-12.8	0		119.212	3	241.472		-5	1022.4	0.58
1985-01-19	-0.2	5.7	-6.5	0	0.4	0.5	1.8	4.8	8.7	-7.9	-8	-8.9	0		120.37	17	253.307		-3	1021.3	0.76
1985-01-20	3.7	10.3	-0.7	4.5	4.8	2.7	2.9	4.7	8.6	-4.2	-4.2	-5.1	0		100.694	18	280.754		0	1006.6	0.82
1985-01-21	2.8	8.3	-4.6	3.7	4	2.3	3.2	4.8	8.5	-11	-11	-11.8	0		124.999	-4	260.747		-2	1009.9	1.39
1985-01-22	-0.2	8	-7.8	1	2.1	1.2	2.6	4.9	8.4	-7.1	-7.1	-8.3	0		99.5364	10	264.62		-3	1013.9	0.51
1985-01-23	3	11	-4.8	3.1	3.4	2.3	2.9	4.8	8.4	-7	-7	-7.9	0		111.11	10	271.952		-1	1011.1	0.88
1985-01-24	1.8	4.4	-0.2	1.8	1.8	3	3.5	4.9	8.3	-6.9	-6.8	-7.7	0		47.4534	7	300.331		-1	1012.3	0.79
1985-01-25	-0.4	5.4	-7.3	-0.1	0.2	1.9	3.2	5	8.3	-13.6	-13.4	-14	0		131.944	15	245.71		-3	1014.3	1.09
1985-01-26	-2.4	6	-10.6	-1.5	-0.7	0.6	2.4	5	8.3	-13.6	-13.4	-14.3	0		135.416	12	237.549		-4	1019.4	1.11
1985-01-27	-1.4	4.2	-9.6	-0.6	0.1	0.3	1.9	4.9	8.2	-10	-9.8	-10.7	0		69.444	4	274.955		-4	1024	0.66
1985-01-28	3.2	10.1	-2.7	3.4	3.6	2.4	2.6	4.7	8.2	-3.2	-2.7	-3.7	1.5		101.851	35	281.872		1	1010	0.78
1985-01-29	-0.1	2.8	-5.3	-0.2	0	2.4	3.2	4.7	8.1	-5.1	-5	-6	0		20.8332	-2	307.538		-2	1007.8	0.65
1985-01-30	-2.7	3.3	-7.8	-3.2	-3	1.4	2.7	4.8	8.1	-11.6	-11.3	-11.9	1		152.777	3	232.311		-2	1007.7	1.54
1985-01-31	-1.8	6.8	-10.2	0.3	1.1	0.4	2.2	4.8	8	-11.8	-11.7	-12.3	0		138.888	16	241.655		-4	1011.7	0.78
1985-02-01	1.9	11.7	-6.3	3.6	4.7	0.8	2.1	4.7	8	-7.2	-7.2	-8.2	0		142.36	19	257.459		-3	1003.5	0.87
1985-02-02	4.4	11.9	-3.5	5.4	5.9	2.3	2.7	4.6	8	-5.4	-5.4	-6.2	0		129.629	31	274.52		0	1005.2	0.87
1985-02-03	3.8	11	-0.2	4.6	5.1	4	4	4.6	7.9	-1	-1	-2.2	1.5		101.851	26	288.323		2	1004.1	0.74
1985-02-04	3	10.7	-4.1	4.1	4.9	2.9	3.8	4.8	7.9	-2.5	-2.9	-4.5	0		136.573	21	269.897		-1	1009.9	0.63
1985-02-05	3.8	7	0.5	3.9	4.4	3.4	3.8	4.9	7.8	0.4	0.1	-0.7	2.5		17.361	4	328.564		-1	1011.3	1
1985-02-06	6.4	10.2	3.1	6.2	6.3	5.3	4.7	5	7.8	1	1.1	0.6	0		62.4996	24	319.513		4	1010.1	0.54
1985-02-07	9.2	14.2	5.9	8.9	9	6.8	6	5.2	7.8	1.2	1.2	0.7	0		122.684	29	306.361		5	1010.8	1.33
1985-02-08	6.2	7.3	5	6	6	6.2	6.3	5.6	7.8	-0.5	-0.4	-1	0.5		39.3516	11	329.365		-1	1018	2.19
1985-02-09	7.1	12.6	4.5	6.9	7	6.5	6.2	5.9	7.6	3.9	4.1	3.5	53		37.0368	5	336.145		2	1005.5	1.9
1985-02-10	8.8	14.1	3.7	8.5	8.5	8.4	7.7	6.1	6.8	4.3	4.6	4.1	4.5		106.481	40	315.198		5	989.5	1.25
1985-02-11	5.8	10	2.4	5.8	6.1	6.3	7.2	6.4	7	-7.6	-7	-7.4	0		159.721	20	270.418		-6	1003.1	2.51
1985-02-12	5	9.3	-2	5.5	5.9	5.4	6.1	6.6	7.2	-4.7	-4.5	-4.9	0		100.694	13	294.754		-1	1007.9	0.7
1985-02-13	4.5	13.4	-2.2	4.6	4.8	5.7	6.2	6.5	7.4	-1.3	-1.3	-2.1	10.5		143.518	31	278.65		0	998.9	1.02
1985-02-14	2.5	6.6	-0.4	2.2	2.4	4.8	6	6.5	7.5	-9.7	-9.1	-9.2	0		152.777	19	260.646		-4	1002.5	2.17
1985-02-15	3.5	8	-0.1	3	3.3	3.8	5.1	6.4	7.6	-10.6	-10.2	-10.5	0		160.879	15	261.21		-4	1007.1	2.62
1985-02-16	4.2	8.1	-1.3	4.3	4.6	4.1	4.8	6.2	7.8	-7	-6.9		0		65.9718	-2	307.196		-2	1006.7	0.76
1985-02-17	4.5	10.6	-1.9	4.9	5.3	4.7	5.1	6	7.8	-6.8	-6.6		0		146.99	23	274.583		0	1010.5	0.74
1985-02-18	3.5	9.2	-4	4.1	4.8	4.3	5	6	7.9	-5.9	-5.8	-6.7	0		121.527	22	281.827		0	1019.8	0.76
1985-02-19	5.2	7.2	3.4	4.5	4.7	5.1	5.4	6	7.8	0.8	1.2	0.4	35.5		21.9906	8	334.328		0	1014.2	1.93
1985-02-20	6.7	8.6	2.9	6.4	6.6	6.3	6.1	5.9	6.6	3.7	3.8	2.7	33.5		26.6202	8	340.082		2	1002.1	1.45
1985-02-21	5.1	11.1	1.7	4.5	4.6	5.7	6	5.8	6.2	-0.7	-0.4	-1.1	0		115.74	35	295.617		2	996.3	1.41
1985-02-22	2.6	7.5	-2.3	2.1	2.3	4.6	5.8	6.2	6.9	-12.1	-11.4	-12	0		179.397	22	253.882		-4	1000.2	2
1985-02-23	3.8	9.5	-0.9	2.1	2.4	3.9	5.3	6.2	7.1	-10.4	-9.9	-10.4	0		171.295	33	263.238		-2	1003	1.83
1985-02-24	3.4	7.4	-1.8	0	3.2	2	5.1	6	7.2	-11.9	-11.5	-12.2	0		179.397	26	258.357		-4	1010.4	1.92
1985-02-25	2.9	9	-4	1	3.6	2	4.8	5.9	7.4	-8.3	-8.1	-9.1	0		180.554	32	259.61		-1	1022	0.88
1985-02-26	3.3	8.9	-1.8	3.3	3.4	3	5.1	5.8	7.4	-6.2	-6.1	-7.1	0		140.045	25	277.553		0	1022.6	0.8
1985-02-27	3.4	8.6	-2.1	3.3	3.5	3	5.2	5.8	7.5	-3.9	-4	-5.2	0		133.101	30	282.592		1	1024.7	1.05
1985-02-28	2.5	3.9	0.6	2.2	2.2	2.8	5.2	5.9	7.6	-1.6	-1.3	-2.3	25		25.4628	10	320.667		-3	1020.6	0.95
1985-03-01	5	9.3	2.2	4.8	4.7	3.6	5.2	5.8	7.2	0.6	0.9	-0.1	4		69.444	32	315.901		3	1010.9	1.5
1985-03-02	5.3	7	1.3	5	5.1	3.6	5.5	5.8	7.3	2.3	2.3	0.9	2.5		19.6758	3	336.792		0	1010.2	0.5
1985-03-03	7.6	13.4	1	7.3	7.2	5.9	6.7	5.9	7.4	0	0.3	-0.5	0.5		126.157	40	307.408		5	1007.9	0.88
1985-03-04	4.3	9.9	-2.2	4.2	4.3	4.2	6.3	6.1	7.5	-7.1	-6.7	-7.4	0		171.295	38	272.899		0	1019	1.41
1985-03-05	4.4	7.1	1.8	4.1	4.1	4.1	6.1	6.3	7.5	-0.1	0.2	-0.9	2		30.0924	-3	328.446		-2	1014.8	0.71
1985-03-06	5	8.1	2.8	4.2	4	4.3	6.1	6.3	7.6	-2.9	-2.4	-3.2	0.5		84.4902	30	310.043		0	1019.7	1.44
1985-03-07	6	10.3	3.6	5.3	5.3	5	6.3	6.4	7.7	-0.6	-0.5		0		89.1198	28	314.378		2	1025.9	0.7
1985-03-08	6.4	10.8	0.7	6.3	6.7	4.8	6.3	6.5	7.8	0.2	4.5		0		50.9256	18	330.561		1	1022.8	0.64
1985-03-09	8.8	11.9	5.7	8	8	6.2	7.2	6.6	7.8	3.9	5	3.8	0.5		15.0462	10	356.384		2	1008.2	1.66
1985-03-10	6.4	10.9	3.3	5.7	5.6	5.8	7.2	6.8	7.9	-2	-0.8	-2.2	0		124.999	38	303.85		1	1024.2	1.35
1985-03-11	1.7	4.9	0.8	0.9	0.9	3.5	6.2	6.9	7.9	-2.3	-1	-2.5	23.5		25.4628	3	317.846		-6	1023.5	1.2
1985-03-12	3.4	6.9	0.6	3.5	3.7	3.3	5.3	6.8	7.7	-2.3	-1	-2.5	6		69.444	16	309.967			1018	0.68
1985-03-13	5.3	9.8	0.2	4.9	5.2	4.7	5.3	6.5	7.7	-1.4	-0.2	-1.5	0		84.4902	31	313.969			1025	0.65
1985-03-14	4.9	7.3	3.5	3.9	3.9	5.7	5.5	6.4	7.7	-0.1	1.1	-0.2	15.5		26.6202	9	332.956			1021.6	1.19
1985-03-15	4.9	9.1	3.3	3.7	3.6	6.1	5.6	6.4	7.5	-3.7	-2.5	-3.7	0		150.462	57	289.846			1028.6
1985-03-16	4.7	9	-1	3.3	4.1	6.3	5.9	6.5	7.6	-4.9	-3.7	-5.1	0			-3				1033.6	0.95
1985-03-17	5.3	7.5	1.7		4.6	6.4	6.1	6.6	7.5	-0.3	1	-0.4	30.5		46.296	15	328.201			1021.7	0.86
1985-03-18	10.1	15.8	3.4		9.6	8.7	7.3	6.6	7	3	3.9	2.5	1		215.276	90	301.214			1015.6	1.56
1985-03-19		8.6	5.2	4.6	5.7	7.7	7.5	6.9	7.4	-0.8	0.4	-0.8	9.5		23.148	6				1018.4	1.4
1985-03-20		11.8	5.3	6.4	6.3	8.3	7.5	7.1	7.5	-0.6	0.7	-0.5	0		157.406	57				1020.7	1.28
1985-03-21	7.8	9.1	5.6	7	7	8.2	7.7	7.3	7.6	2.3	3.5	2.2	8		47.4534	15	340.887			1014.9	1.02
1985-03-22	8	14.1	1.3	7.2	7.5	8.2	7.7	7.4	7.7	-0.7	0.2	-1.4	0		202.545	60	293.011			1016.6	1.46
1985-03-23		7.9	5.7	5	4.9	7.2	7.4	7.5	7.9	-4	-2.6	-3.7	0.5		45.1386	15				1023	1.75
1985-03-24		11.9	3.7	5.8	5.8	7.8	7.3	7.6	8	-3.4	-2.3	-3.3	0		181.712	51				1027.7	1.29
1985-03-25	9.5	15.8	-0.3	8.9	9.1	8.4	7.6	7.6	8.1	1	1.9	0.3	0		160.879	48	314.204			1024.3	1.56
1985-03-26	14.7	20.7	8.4	14.1	13.9	11.3	9.5	7.7	8.2	6.2	7.2	5.9	0		92.592	28	363.274			1009.6	2.9
1985-03-27	6.5	8.2	5.4	5.4	5.3	8.6	8.7	8.1	8.3	-1.6	-0.3	-1.5	5.5		23.148	6	342.671			1006.9	1.61
1985-03-28	7.6	10.3	3.3	7.2	7.1	8.6	8.1	8.2	8.4	2.1	2.9	1.6	0		83.3328	34	329.58			1005.4	1.5
1985-03-29	9.1	11.5	7	8.8	8.6	9.5	8.6	8.2	8.5	4.4	5.2	4.1	1		52.083	22	347.243			1006.4	0.91
1985-03-30	9.3	16.3	5.9	8.8	8.7	10.6	9.5	8.3	8.6	0	0.8	0	1.5		179.397	69	308.609			1006.7	1.44
1985-03-31	5.2	10.6	1.8	4.5	4.6	9.1	9.1	8.6	8.6	-0.7	0.2	-0.8	7		123.842	40	306.003			1012.9	1.26
1985-04-01	6.4	14.3	-0.8	6.4	7.1	8.9	8.6	8.7	8.7	-5.4	-4.3	-5.2	0		267.359	84	268.735			1020.8	0.78
1985-04-02	9.1	15.6	-0.4	8.8	9.2	9.4	8.8	8.7	8.8	-2.6	-1.7	-2.5	0		217.591	72	296.107			1025.9	1.65
1985-04-03	14.4	19.6	7.3	14.1	14	11.5	10	8.8	8.9	3.2	3.8	2.8	0		211.804	82	328.06			1023.8	1.9
1985-04-04	14.5	16.9	12.6	14.2	14.2	12.5	11	9	9	10	10.7	9.6	29		40.509	18	380.206			1010.9	1.34
1985-04-05	14.3	18.9	11.5	14	13.9	13.9	12.2	9.5	9	5.6	6.3	5.3	0		199.073	83	334.278			1008.3	1.46
1985-04-06	12.5	19.5	3.5	12.6	12.6	13.3	12.3	10	9.1	-1.7	-1.1	-1.7	0		269.674	89	299.364			1015.7	1.04
1985-04-07	12.5	14.8	10.8	12.2	12.1	12.7	12	10.3	9.2	6.3	6.8	6	5		42.8238	12	368.481			1013.2	1.09
1985-04-08	12.9	15	10.4	13	12.9	12.6	11.8	10.5	9.4	8.8	9.4	8.3	8		40.509	14	371.803			1005.1	1.56
1985-04-09	11.8	18	8	11.4	11.1	13.6	12.3	10.6	9.6	6.9	7.3	6.4	0.5		224.536	95	319.877			1009.3	1.6
1985-04-10	11.8	19.7	6.9	11.3	11.1	14	12.8	10.8	9.7	6.5	6.9	5.9	0		192.128	78	327.054			1014.3	1.48
1985-04-11	13.9	19.9	9.7	13.4	13.1	14.6	13.3	11.1	9.9	7.8	8.2	7.3	3		153.934	68	347.594			1012	1.53
1985-04-12	8.2	12.2	5.6	7.8	7.7	11.8	12.2	11.4	10	4	5	3.7	16.5		18.5184	6	353.585			1009.3	2.21
1985-04-13	9.3	13.2	6.1	8.9	8.8	11.2	11	11.4	10.1	2.6	3.6	2.4	0.5		69.444	30	344.262			1006.6	1.27
1985-04-14	9.1	13	6.4	8.6	8.6	11.4	11.2	11.2	10.3	1.9	2.6	1.5	0		256.943	101	295.868			1013.1	2.38
1985-04-15	9.9	14.1	5	9.4	9.2	11.9	11.2	11.1	10.4	3.1	3.7	2.7	4		148.147	65	326.794			1016.7	1.43
1985-04-16	11.6	15.2	7.8	11.1	10.9	12.6	11.8	11.1	10.4	6.4	7.1	6.1	4		108.796	41	347.244			1008.6	1.2
1985-04-17		18.8	6	11.5	11.4	13.6	12.4	11.2	10.5	2.7	3.3	2.3	0.5		278.933	107				1005.9	1.42
1985-04-18		13.9	6	9.1	9.2	12	12	11.4	10.6	3.8	4.9	3.9	6.5		60.1848	9				1007.3	1.07
1985-04-19	11.5	17	3.7	11.2	11.2	12.5	11.7	11.4	10.6	3.8	4.4	3	0		261.572	97	309.28			1016.9	1.21
1985-04-20	13.8	19.1	8.8	13.8	13.8	13.2	12.4	11.5	10.7	6.7	7.6	6.7	6		111.11	32	358.306			1009.7	1.05
1985-04-21	13.9	22	5.5	13.2	13.5	13.9	12.8	11.6	10.8	3.8	4.5	3.4	0		278.933	96	316.492			1011.3	1.58
1985-04-22	16.3	21.6	9.6	15	14.8	15.1	13.6	11.8	10.8	8.1	8.7	7.6	0.5		215.276	86	347.932			1011.3	1.63
1985-04-23		19.9	14.3	15.8	15.7	15.9	14.5	12.2	11.3	11.4	11.8	11	54.5		113.425	53				1004	1.3
1985-04-24		23.3	6.5	14	14.2	14.8	14.4	12.7	11.7	6.1	6.6	6.2	7		101.851	28				1003.2	1.39
1985-04-25	13.6	21.8	5.9	13.6	14	14.6	13.7	12.8	11.8	1.5	1.7	1.6	0		271.989	93	314.547			1011.5	0.95
1985-04-26	16.7	22.6	9.7	16.9	16.7	16	14.6	12.9	11.8	9	8.9	8.3	0		228.008	88	349.249			1009.4	2.34
1985-04-27	15.3	19.1	10.5	15.2	15	15.5	14.8	13.1	11.8	9.8	9.9	9.4	4.5		26.6202	2	389.22			1005.3	3.08
1985-04-28	13.7	19.1	9.3	13.1	12.9	15.3	14.5	13.2	11.8	3.9	3.9	3.6	0.5		270.832	103	319.455			1012.7	1.61
1985-04-29	14	22.1	5.4	14	14.2	15.5	14.6	13.3	11.8	4.1	4.2	3.6	0		287.035	97	317.979			1015.2	1.1
1985-04-30	14.9	23.4	6.7	14.9	15.1	15.9	14.9	13.4	11.9	4.5	4.5	3.9	0		260.415	88	328.569			1018.2	0.98
1985-05-01	17.9	25.9	9.6	17.2	17.2	16.8	15.4	13.6	12	6.6	6.5	6.1	0		262.73	103	345.377			1017.2	1.02
1985-05-02		27	14.4	18.9	18.8	18	16.3	13.8	12.1	9.5	9.4	8.8	0		245.369	102				1015.2	0.98
1985-05-03		27.7	11	19.2	19.2	17.9	16.6	14.1	12.2	8.7	8.5	7.6	0		253.471	103				1012.1	0.98
1985-05-04		24.3	12.5	17.4	17.4	17.4	16.6	14.4	12.3	7.5	7.4	6.9	0		275.461	113				1013.6	2.02
1985-05-05	19.1	25.2	12.7	17.6	17.2	18.1	16.7	14.7	12.4	9.6	9.5	9.1	0		207.175	101	368.076			1014.3	2.19
1985-05-06		24.9	15.1	20	19.7	18.8	17.3	14.9	12.5	12.4	12.4	12.1	1		114.583	56				1007.1	2.11
1985-05-07		15.7	13.5	12.8	12.6	16.3	16.3	15.1	12.7	9.4	9.3	8.8	1		43.9812	23				1007.5	1.62
1985-05-08	16.3	23.9	13	15	14.7	17.5	16.3	15.1	12.8	7.9	7.7	7.3	0.5		265.045	130	340.589			1008.9	1.43
1985-05-09		25.7	13.8	18.2	17.9	18.6	17.1	15.2	12.9	8.6	8.6	8.2	0		255.785	116				1012.2	1.25
1985-05-10		22.8	16.2	17.9	17.7	18	17.1	15.4	13	10	9.9	9.5	0		149.305	56				1014.1	1.37
1985-05-11		23.3	14.8	17.1	17	18.4	17.2	15.5	13.2	10.1	10.1	10	1.5		184.027	82				1011.2	0.77
1985-05-12		24.8	11.6	17.3	17.3	18.6	17.4	15.7	13.3	9.6	9.6	9.1	0.5		284.72	116				1014.7	1.15
1985-05-13	18.4	23.2	13.6	17.5	17.2	18.5	17.4	15.8	13.4	11.3	11.1	10.7	0		151.619	68	379.037			1011.4	1.59
1985-05-14	17.7	18.7	16.9	17.7	17.5	18.5	17.5	16	13.5	13.7	13.7	13.3	6		55.5552	24	396.93			1003.4	1.04
1985-05-15	19.5	28.7	14	19.7	19.5	19.6	18	16	13.6	4.6	4.7	5	0.5		319.442	136	340.455			1007	0.96
1985-05-16	15.6	20.5	9.5	15.5	15.5	17.7	17.6	16.2	13.7	-2.4	-2.2	-1.6	0		321.757	122	312.067			1020.3	1.32
1985-05-17	16.7	25	7	16.7	16.7	17.7	17	16.3	13.8	4	4	4	0		310.183	118	329.285			1023.8	1.01
1985-05-18	18.8	24.3	11	18.7	18.5	18.5	17.4	16.3	13.9	9.4	9.2	8.6	0		262.73	102	357.222			1018.3	1.56
1985-05-19	20.7	24.1	17.3	19.8	19.3	19.3	18	16.4	14.1	10.2	10.1	9.9	0		239.582	100	372.406			1012.2	2.84
1985-05-20	20.5	21.7	19.3	19.6	19.4	19.2	18.1	16.6	14.2	16	15.9	15.5	22.5		43.9812	17	415.694			1003.8	2
1985-05-21		16	13.6	13.7	13.5	17.5	17.4	16.7	14.2	9.9	10	9.7	7.5		57.87	30				1004.9	1.71
1985-05-22		20.4	12.4	15.2	15	17.6	16.9	16.7	14.3	9.6	9.5	9	0		137.731	63				1009.2	0.81
1985-05-23	19.5	26.5	12	19.7	19.7	19.2	17.7	16.6	14.4	12.3	12.1	11.3	0		276.619	121	363.488			1013	0.64
1985-05-24	20.3	24	16.5	19.7	19.5	19.4	18.2	16.6	14.5	14.8	14.8	14.4	14		86.805	38	405.784			1011.8	0.76
1985-05-25	22.1	24.3	19.5	21.1	20.8	20.1	18.8	16.8	14.6	17.2	17.4	16.9	4.5		55.5552	28	423.031			1004.6	1.82
1985-05-26	22.3	27.1	17.9	21.4	21.2	21	19.4	17.1	14.7	14.5	14.5	14.1	0		168.98	84	400.677			1001.9	1.27
1985-05-27	20.3	25	14.1	19.6	19.4	20.4	19.4	17.3	14.8	6.6	6.8	6.8	0		288.193	127	355.814			1004.1	1.05
1985-05-28		22	16.1	18.4	18.2	19.4	18.8	17.5	14.9	8.8	9	8.7	0		188.656	87				1006.1	1.62
1985-05-29		18.3	13.1	15.3	15.2	18.4	18.2	17.5	15	11.5	11.7	11.3	18		41.6664	14				1002.7	0.93
1985-05-30	14.9	18.7	9.3	13.9	13.7	17.8	17.5	17.5	15.1	6.6	6.8	6.4	0		312.498	140	326.272			1008.3	1.58
1985-05-31	16.9	20.9	12.6	15.9	15.7	18.1	17.5	17.3	15.2	7.8	7.9	7.6	0		240.739	106	351.157			1011.2	1.2
1985-06-01	17.9	22.3	13	17.3	17.2	18.6	17.7	17.3	15.3	9.4	9.4	9	0		243.054	107	357.877			1011.1	1.03
1985-06-02	19.6	25.3	12	18.9	18.9	19.1	18	17.2	15.3	11.1	11	10.3	0		251.156	112	367.421			1011.5	0.8
1985-06-03		26.3	18.5	20.9	20.7	20.4	18.9	17.3	15.3	13.6	13.6	13.2	0		208.332	97				1008.5	0.71
1985-06-04		27	17.1	20.8	20.7	21	19.6	17.5	15.4	11.8	11.8	11.6	0.5		252.313	114				1006.8	0.91
1985-06-05	21.7	29.9	14.1	21.6	21.6	20.8	19.6	17.8	15.4	8.4	8.3	8	0		319.442	140	360.672			1006.6	0.65
1985-06-06	23.3	32	14.7	23.5	23.5	21	19.8	18	15.5	9.8	9.6	9.3	0		302.081	130	374.553			1005.5	0.99
1985-06-07	23.4	30.8	15.3	22.9	22.8	21.2	19.9	18.2	15.6	13.5	13.4	12.8	0		249.998	104	391.229			1005.1	1.13
1985-06-08		21.3	18.6	18.7	18.4	20.2	19.7	18.3	15.7	13.8	13.8	13.3	1		50.9256	11				1006.5	1.13
1985-06-09		20.5	17.5	17.6	17.3	19.8	19.2	18.4	15.8	13.7	13.8	13.5	4.5		69.444	32				1007.6	0.87
1985-06-10		20.9	16.9	17.5	17.1	19.4	18.9	18.3	15.9	12.8	12.6	12.2	0		86.805	47				1010.6	1.42
1985-06-11		21	15.7	16.6	16.3	19.1	18.5	18.2	15.9	11	10.9	10.7	1		126.157	66				1010.1	1.11
1985-06-12		20.9	15.9	16.8	16.5	19	18.4	18.1	16	11.7	11.7	11.4	6.5		135.416	71				1008.7	1.21
1985-06-13		17.8	15.3	15.5	15.3	18.3	18.1	18	16	11.6	11.7	11.3	21.5		56.7126	26				1008.5	1.89
1985-06-14		17	14	14.1	13.9	17	17.1	17.9	16.1	8	8.1	7.7	10		64.8144	29				1006.8	1.84
1985-06-15		18.7	13.7	14.3	14	17.1	16.8	17.6	16.2	5.4	5.4	5.2	0		182.869	96				1012.4	1.62
1985-06-16		22	11.6	15.8	15.8	17.9	17.2	17.4	16.2	7.4	7.5	7.3	0		270.832	115				1014.8	0.85
1985-06-17	17	22.6	10.4	16.3	16.5	17.8	17.2	17.4	16.2	7.7	7.9	7.3	0		269.674	114	347.041			1015.5	1.12
1985-06-18	17.7	20.5	15.4	16.8	16.6	17.9	17.4	17.4	16.1	12	12.1	11.4	6		67.1292	31	394.786			1014.1	0.88
1985-06-19	20.5	23.7	18	19.6	19.3	19.2	18	17.4	16.2	15.5	15.6	14.9	22.5		90.2772	51	407.183			1006.4	1.19
1985-06-20	19.8	24.1	17.5	18.7	18.4	19.2	18.3	17.6	16.9	14.5	14.7	14.1	62.5		116.897	61	397.751			1007	1.41
1985-06-21		22.5	19	19	18.6	19.6	18.6	17.8	17.1	15.4	15.4	14.6	0		75.231	44				1009.6	1.03
1985-06-22		28.2	20.5	22.7	22.4	21.2	19.4	17.9	17	18.2	18.2	17.6	3.5		136.573	75				1005	0.66
1985-06-23		28.2	21.9	23.5	23.2	22.4	20.6	18.2	17	18	18	17.5	14		150.462	77				1006.5	0.71
1985-06-24		22.7	20.3	20.2	19.9	21.5	20.7	18.6	17.1	16.6	16.8	16.1	12.5		81.018	45				1007.8	1.8
1985-06-25		23	20.5	20	19.7	20.9	20.1	18.9	17.4	16.6	16.7	16	13.5		52.083	26				1003.6	1.16
1985-06-26		27.9	20.4	22.6	22.2	21.9	20.5	18.9	17.8	17	16.9	16.4	5.5		192.128	99				1001	0.68
1985-06-27		24.1	19.7	20.6	20.3	21.7	20.9	19.1	17.7	14.9	15.1	14.3	0.5		143.518	74				1002.5	1.81
1985-06-28		19.9	17.9	17.7	17.4	20	19.9	19.3	17.9	14	14.3	13.5	33		37.0368	17				1002.2	1.54
1985-06-29		22.2	18.2	18.9	18.5	19.9	19.4	19.2	18.3	14.2	14.3	13.5	0		82.1754	44				1007.7	0.96
1985-06-30	21.6	25.1	20.4	20.2	19.8	20.2	19.6	19.1	18.5	17.3	17.5	16.6	95.5		27.7776	16	425.662			1004.5	1.28
1985-07-01		33	22.2	26.8	26.7	23.2	21.2	19.1	18.7	15.6	15.7	15.6	34.5		277.776	157				991.1	2.52
1985-07-02		23.2	19.2	21.1	21	22	21.3	19.4	18.7	16.3	16.2	15.4	1.5		65.9718	21				1007.1	0.59
1985-07-03		25.4	19	21.2	21	21.9	20.9	19.6	18.8	17.3	17.1	16.3	0.5		119.212	55				1007.2	0.69
1985-07-04		23.2	20.5	20.9	20.5	22	21.1	19.7	18.6	17.3	17.3	16.6	3.5		56.7126	31				1003.5	1.31
1985-07-05		22.5	20.4	20.1	19.7	21.3	20.7	19.8	18.5	16	16.2	14.8	0		42.8238	23				1008	1.09
1985-07-06	24.8	28.7	21.1	23.8	23.5	22.7	21.2	19.8	18.4	18.8	19.3	17.9	0		135.416	70	426.045			1002.5	0.58
1985-07-07		26.5	23.4	23.6	23.4	23	21.8	19.9	18.3	19.6	19.9	18.6	0.5		71.7588	29				1003.5	0.64
1985-07-08		24.8	20.9	22.4	22.1	22.8	21.8	20	18.2	18.4	18.8	17.2	1		92.592	43				1001.6	1.11
1985-07-09		31.9	20.2	24.2	23.8	23.6	22.1	20.1	18.2	17.1	17.5	16.4	0		249.998	122				1005.4	0.85
1985-07-10		28	22	24.1	23.6	23.5	22.3	20.3	18.2	18.9	19.2	17.7	0		101.851	49				1006.3	0.92
1985-07-11		30.4	24.2	25.5	25.2	24	22.7	20.5	18.2	21.4	21.7	20.1	7		111.11	54				999.1	1.04
1985-07-12		29.3	24.5	25.7	25.3	24.5	23.1	20.6	18.2	21.3	21.4	19.9	0		116.897	55				997.8	0.78
1985-07-13		24.4	23.3	22.5	22.1	23.5	22.8	20.8	18.2	19.3	19.7	18.3	9		34.722	12				996.7	0.95
1985-07-14		31.4	20.2	24.9	24.5	24.5	23	20.9	18.3	19.3	19.8	18.6	4.5		224.536	124				994.7	1.15
1985-07-15		31.9	20	24.5	24.2	24.6	23.3	21	18.3	14.5	14.9	14.5	0.5		304.396	162				1001.1	0.73
1985-07-16		31.6	19.4	24.4	24.2	24.3	23.3	21.2	18.4	15.9	16.3	15.1	0		276.619	141				1004.1	0.97
1985-07-17	26.2	31.2	22	24.9	24.5	24.4	23.3	21.3	18.5	18.2	18.5	17.1	0		178.24	91	426.013			1002	1.11
1985-07-18		32.4	23.9	27.1	26.6	25.6	23.9	21.4	18.5	20.5	20.8	19.4	0		247.684	129				1000.1	1.36
1985-07-19	28.4	33.7	23.3	27.6	27.3	25.9	24.4	21.5	18.6	20.1	20.3	18.8	0		271.989	151	427.693			1006.3	0.98
1985-07-20		30.9	23.5	25.5	25	25.7	24.4	21.7	18.7	19.8	20	18.5	0		219.906	127				1013.2	1.22
1985-07-21	26.3	31.2	22.7	25	24.6	25.5	24.4	21.9	18.8	20.4	20.5	19.2	1.5		188.656	107	428.279			1015	0.8
1985-07-22	26.4	31.9	22.4	25.4	25.1	25.3	24.2	22.1	18.9	19	19.1	18.3	0		207.175	114	423.758			1012.4	0.76
1985-07-23	27.3	33.1	22	26.2	25.8	25.9	24.5	22.1	18.9	19.1	19	18.1	0		276.619	149	418.509			1009	0.7
1985-07-24		33.2	22.9	27	26.7	26	24.7	22.3	19	20.2	20.2	19.2	0		254.628	133				1006.3	0.74
1985-07-25		33.3	22.6	27.2	26.8	25.9	24.8	22.4	19.1	19.4	19.4	18.6	0		285.878	149				1005.9	0.77
1985-07-26	27.5	32.7	23.2	26.4	26	26	24.8	22.5	19.2	20.9	20.8	19.8	0		293.98	155	421.093			1007.6	0.97
1985-07-27	28.1	32.8	23.8	27.1	26.7	26.2	25	22.6	19.3	20.7	20.6	19.7	0		266.202	138	427.709			1010	0.84
1985-07-28		34.3	23.1	27.7	27.4	26.4	25.1	22.7	19.4	20.4	20.7	19.3	0		285.878	148				1009.4	0.64
1985-07-29	29	35.9	22.5	28.5	28.1	26.4	25.1	22.8	19.5	20.2	21	19.4	0		267.359	138	431.247			1005.3	0.69
1985-07-30			24.6	28.4	27.8	26.9	25.5	22.9	19.5	21.2	22	20.5	0		255.785	138				1004.6	1.11
1985-07-31		33	25.3	27.8	27.2	26.9	25.6	23	19.6	21.8	22.5	20.8	0		202.545	102				1006.4	0.85
1985-08-01		30.8	25.5	26.3	25.7	26.5	25.4	23.1	19.7	21.6	22.4	20.7	0		166.666	90				1009.5	1.34
1985-08-02		33.8	25.3	27.7	27.1	26.7	25.5	23.2	19.8	21.5	22.2	20.4	0		178.24	91				1010.4	0.94
1985-08-03		34.9	23.3	27.9	27.4	26.7	25.5	23.2	19.9	20.2	20.9	19.3	0		271.989	137				1010.3	1.09
1985-08-04		34.9	24.1	27.9	27.4	26.8	25.5	23.3	20	20.9	21.7	20	0		237.267	119				1009.1	1.06
1985-08-05		33.4	24.4	27.7	27.2	26.7	25.6	23.4	20	21.5	22.4	20.6	0		229.165	115				1008.6	1.08
1985-08-06		32.6	25.2	27.7	27.1	26.9	25.7	23.4	20.1	21.3	22.1	20.5	0		188.656	93				1007	1.66
1985-08-07		32.8	25.8	27.6	27	26.9	25.7	23.5	20.2	21.4	22	20.6	0		201.388	101				1007.1	1.75
1985-08-08		34.5	25	28.2	27.6	27.3	25.9	23.5	20.2	20.9	21.3	20.1	0		269.674	136				1010.3	1.59
1985-08-09		32	24.1	27.1	26.6	26.5	25.6	23.6	20.3	21.1	21.1	20.1	0		200.23	96				1013	1.05
1985-08-10		30.7	24.6	25.8	25.4	25.9	25.3	23.6	20.4	21.3	21.2	20.3	11		158.564	78				1011.8	0.92
1985-08-11	25.9	28.5	24.5	24.8	24.4	25.3	24.8	23.6	20.4	21.8	21.7	20.4	15		68.2866	30	444.646			1008	1.22
1985-08-12		31.9	25.1	27.3	26.7	26.3	25	23.5	20.5	22.1	21.5	20.7	0		195.601	109				1010.5	1.14
1985-08-13	28.5	32.9	24.7	27.6	27.2	26.5	25.4	23.4	20.5	22	21.5	20.7	0			78				1011.9	0.68
1985-08-14		33.7	24.7	27.6	27.1	26.8	25.6	23.5	20.6	20.9	20.4	19.7	0		226.85	120				1009.7	0.94
1985-08-15		33.7	23.5	27.5	27.1	26.7	25.6	23.6	20.6	22.1	21.7	20.7	0		211.804	112				1008.3	0.83
1985-08-16		33.9	25.6	28.3	27.8	27.1	25.9	23.6	20.7	22.2	21.8	21	0		244.211	129				1009.5	0.96
1985-08-17		33.8	25.4	28.4	27.8	27	25.9	23.7	20.7	22.9	22.5	21.5	0		190.971	96				1010.4	0.75
1985-08-18		35.5	25.7	29	28.5	27.4	26.1	23.8	20.8	22.6	22.2	21.4	0		246.526	133				1010	0.68
1985-08-19		31.8	25.8	27	26.5	26.9	26	23.9	20.8	20	19.8	19	0		254.628	143				1011.5	1.72
1985-08-20		27.8	24.2	24.7	24.3	25.6	25.3	23.9	20.9	19.6	19.3	18.5	10.5		81.018	43				1014	1.04
1985-08-21		30.4	23.7	21.4	25	25.5	24.9	23.8	20.9	18.4	18	17.4	0		174.767	87				1014	0.61
1985-08-22		31.2	22.6	25.4	24.9	25.5	24.8	23.7	20.9	18.5	18.3	17.6	0		241.897	122				1014.5	0.85
1985-08-23		30.8	19.8	24.9	24.6	24.9	24.5	23.6	21	17	16.7	15.9	0		260.415	123				1015.9	0.69
1985-08-24		32.9	18.8	25.3	25.2	24.4	24	23.5	21	17.5	17	16	0		251.156	116				1013.2	0.66
1985-08-25		33	20.4	25.6	25.4	24.7	24.1	23.3	21	18.7	18.3	17.3	0		222.221	103				1010	0.69
1985-08-26		33.5	21	23.1	25.9	24.8	24.1	23.2	21	18	17.7	16.6	0		251.156	119				1007.7	0.79
1985-08-27		33.2	22.6	24	25.6	25.1	24.2	23.2	21	19.7	19.3	18.4	0		208.332	97				1003.1	1.21
1985-08-28	26.6	33.6		26.7	25.3	25.4	24.4	23	20.8	18.7	18.4	17.3	0		234.952	112	415.636			1003.1	1.48
1985-08-29		35.1	22.9	29	27.7	25.9	24.7	23.2	21	21.3	20.9	19.9	0		237.267	121				1007.6	1.03
1985-08-30		31.2	24.9	26.3	26	25.9	25	23.3	21	22.5	22.3	21.2	31		149.305	75				1010.4	1.35
1985-08-31		32.9	24.9	27.5	27	25.8	24.8	23.5	21.6	22.5	22.3	21.3	58.5		219.906	116				1005.6	3.52
1985-09-01		34.7	26.6	29	28.5	26.8	25.5	23.6	21.7	22.1	21.7	20.9	0		248.841	122				1006.1	2.4
1985-09-02		33.9	24.8	26.9	26.4	26.2	25.5	23.7	21.6	20.7	20.1	19.3	0		239.582	124				1011.1	1.19
1985-09-03		28.9	24.1	24.6	24.1	25.4	24.9	23.8	21.5	19.3	18.9	18.1	0		116.897	64				1016.7	1
1985-09-04		32.4	24.5	26.4	26	25.7	24.8	23.7	21.5	21	20.5	19.6	0		150.462	78				1013.3	0.67
1985-09-05		34.7	24.5	27.7	27.3	26.2	25.1	23.7	21.5	21.9	21.4	20.4	0		200.23	103				1009.6	0.76
1985-09-06		31.9	23.6	26.3	25.9	25.9	25.2	23.7	21.5	19.5	19.2	18.5	0.5		211.804	110				1010.1	1.21
1985-09-07		31.6	23.1	25	24.6	25.4	24.9	23.7	21.5	20.3	20	19.2	6.5		175.925	96				1005.5	1.6
1985-09-08		32.1	22.1	25.1	24.8	25.5	24.8	23.7	21.5	18.4	17.9	17.3	0		225.693	109				1005.4	0.81
1985-09-09		30.2	19.9	23.8	23.7	24.2	24.1	23.7	21.5	15.4	15.1	14.7	0		188.656	89				1011.4	0.6
1985-09-10		30.5	20.8	24.7	24.6	24.2	23.8	23.5	21.5	17.9	17.5	16.9	0		166.666	82				1011	0.71
1985-09-11		27.2	21.8	22.6	22.2	23.8	23.6	23.4	21.5	16.9	16.6	15.8	0		82.1754	38				1004.3	1.3
1985-09-12		28.3	21.5	22.9	22.7	23.6	23.3	23.3	21.5	17.5	17	16.3	0		131.944	62				1001.7	0.61
1985-09-13		29	19.5	23.1	22.8	22.7	22.7	23.1	21.4	10.4	10.2	9.9	0		240.739	100				1006.2	0.87
1985-09-14		26.5	19.4	21.3	21	22.4	22.4	22.8	21.4	12.9	12.6	12.1	0		194.443	88				1013.9	1.04
1985-09-15		21.7	18.4	18.3	18.1	21.4	21.7	22.6	21.4	14.5	14.3	13.5	7.5		43.9812	16				1019.1	0.54
1985-09-16		20.2	18.6	18	17.7	21.1	21.2	22.4	21.3	15.2	15	13.3	2.5		27.7776	10				1015.1	0.61
1985-09-17		25.4	19.3	20.4	20.2	21.2	21.1	22.1	21.3	12.9	12.9	11.3	0.5		162.036	80				1017.6	0.74
1985-09-18		23.3	19.4	19.4	19.2	21.1	21	21.9	21.2	15.6	15.3	13.6	0.5		54.3978	29				1011.1	0.56
1985-09-19		27.8	20.3	21.7	21.4	21.9	21.3	21.7	21.1	16.9	16.4	14.7	0		123.842	67				1009.1	0.66
1985-09-20		27.8	21.5	21.9	21.5	22.3	21.7	21.6	21	17.5	17.1	15.3	0		98.379	52				1007.5	1.12
1985-09-21		25.6	21.1	21.6	21.3	22.1	21.6	21.6	20.9	16.5	16.2	14.5	0.5		79.8606	42				1014.6	0.6
1985-09-22		22.4								9.2	9.2	8.3	6.5		9.2592	3					0.4
1985-09-23		19.8								7.1	6.9	6.4				-3					0.25
1985-09-24		18.9	15.6	15.4	15.1	19.2	19.6	21.3	20.8	12.1	12.3	10.8	12.5		34.722	18				1015.6	1.11
1985-09-25		23.5	17.5	19	18.7	19.7	19.5	20.9	20.7	14.3	14.3	12.9	1.5		74.0736	41				1013.3	0.68
1985-09-26		28.1	19.1	20.9	20.7	20.8	20.1	20.7	20.6	14.5	14.3	13.1	0		192.128	91				1016.7	0.68
1985-09-27		22.3	19.4	18.7	18.3	20	20	20.7	20.5	9.5	9.4	8.1	0		108.796	51				1020.7	1.62
1985-09-28		20.6	17.5	17.4	17.2	19.3	19.4	20.6	20.4	11.3	11.3	10	3		26.6202	8				1016.5	0.71
1985-09-29		19.9	17.5	16.8	16.6	19	19.1	20.4	20.3	13.8	13.7	12.3	20.5		17.361	7				1007.3	1.19
1985-09-30		24.9	17.5	19.3	18.9	19.4	19	20.1	20.3	14.2	14.1	12.6	2		116.897	56				1008.1	1.12
1985-10-01		27.7	17.7	20.9	20.7	20	19.5	20	20.2	13.9	13.8	12.4	0		140.045	56				1006.4	0.86
1985-10-02		26.2	12.7	18.3	18.4	19	19.1	20	20.1	8.2	8.4	7.5	0		193.286	68				1011	0.55
1985-10-03	17.5	25.9	8.5	17.6	17.8	17.8	18.2	19.8	20	9.5	9.3	8.2	0		204.86	70	348.478			1016.4	0.54
1985-10-04	18.6	23.4	12.7	18.2	18.4	17.9	18	19.6	19.9	12.1	12.1	11.2	0		85.6476	31	388.53			1015.8	0.35
1985-10-05		22	17.4	18.1	17.9	18.5	18.3	19.4	19.8	13.3	13.3	12.4	0.5		43.9812	12				1016	0.54
1985-10-06		19.8	16.3	16.7	16.4	18.2	18.1	19.3	19.7	13.7	13.7	12.6	17.5		39.3516	20				1011.8	1.51
1985-10-07		25.6	16.6	19.1	18.9	18.9	18.4	19.1	19.6	14.8	14.5	13.4	0.5		135.416	56				1002	0.75
1985-10-08		26.3	13.2	18.5	18.7	18.2	18.3	19.1	19.5	8.2	7.9	6.8	0		200.23	73				1006.4	1.1
1985-10-09		24.8	11.1	18.2	18.3	17.6	17.7	19	19.4	9.9	9.7	9	0		197.915	76				1017.3	0.78
1985-10-10	20.1	24.7	14.6	19.3	19.3	18.4	18	18.8	19.3	12.9	12.6	11.8	0		124.999	50	385.022			1022	0.69
1985-10-11		21	19.4	18.9	18.6	18.9	18.4	18.8	19.3	15.9	15.8	15.1	11.5		26.6202	10				1021.3	0.83
1985-10-12		27.5	20.1	21.8	21.5	20	19	18.8	19.2	17.7	17.3	16.6	0.5		107.638	49				1016.7	0.96
1985-10-13		30.8	22.5	25.3	24.9	21.1	19.8	18.9	19.1	17.4	17	16.2	0		170.138	65				1005	2.74
1985-10-14		23		15.8	16.1	18.8	19.3	19.1	19.1	11.6	11.6	10.2	26		32.4072	-3				1008.7	0.88
1985-10-15	12.9	19.9	7.5	12.8	13.3	15.7	16.8	19.1	19.1	5.2	5.2	4.2	0		162.036	48	327.698			1019.9	0.7
1985-10-16		19.4		14.2	14.2	15.4	16	18.7	19	8	7.7	6.7	0		158.564	55				1014.1	0.59
1985-10-17	14.9	18.1	11.6	15.2	15	16.8	16.7	18.3	19	10.8	10.8	10.1	2.5		34.722	15	381.827			1005.4	0.83
1985-10-18	11.3	13.8	7.5	12.1	12.3	15.3	16	18.1	18.9	3.5	3.8	3.6	0.5		50.9256	8	355.116			1011.1	0.45
1985-10-19	11.3	18.1	5.8	12.7	13.2	14.1	15	17.8	18.8	4.8	4.7	3.8	0		160.879	53	318.504			1014.4	0.51
1985-10-20	12.2	15.9	7	12.6	12.6	14.1	14.6	17.5	18.7	6.1	5.9	4.8	0		62.4996	21	356.142			1019	0.95
1985-10-21	13.3	18.5	9.1	14.3	14.4	14.7	14.9	17.1	18.6	4.1	4	3.4	0		143.518	44	331.593			1022.1	0.63
1985-10-22	12.3	18.6	8	13.8	14.3	14.1	14.6	16.9	18.4	7.2	6.9	5.4	0		77.5458	16	351.516			1015.1	0.39
1985-10-23	13.4	21.1	5.8	14.3	14.6	13.7	14.1	16.7	18.3	5.9	5.6	4.5	0		165.508	47	326.158			1012.4	0.72
1985-10-24	13.9	22.4	7.5	15.2	15.2	14.4	14.4	16.5	18.2	5.7	5.6	5.3	0		155.092	42	330.964			1009.5	0.7
1985-10-25	10.4	17.6	5.1	12.3	12.7	13.4	14.1	16.3	18	0.6	0.8	0.7	0		173.61	47	302.489			1016.9	0.57
1985-10-26	10	13.9	3.6	10.4	10.5	12.6	13.3	16.1	17.9	2.8	2.8	2.3	0		83.3328	25	334.493			1021.3	0.51
1985-10-27	12.3	21.1	6.3	13.8	14.1	13.4	13.6	15.8	17.8	3.8	3.9	3.5	0		162.036	39	317.692			1017.4	0.67
1985-10-28	10.9	17.5	3.3	12.1	12.6	12.4	13.1	15.7	17.6	2.4	2.3	1.7	0		155.092	36	311.681			1022.1	0.5
1985-10-29	10.8	13.5	6.4	11	10.9	12.6	12.9	15.4	17.5	6.9	6.8	6.1	5		41.6664	10	355.617			1020.9	0.62
1985-10-30	14.2	16.6	12.1	14.5	14.2	14.1	13.6	15.3	17.4	11.8	11.5	10.7	3.5		37.0368	17	376.226			1013.1	0.5
1985-10-31	16.7	21	13.9	17	16.6	15.1	14.5	15.2	17.3	9.7	9.5	8.7	0		128.471	46	355.335			1011.1	1.53
1985-11-01	13.9	15.5	10.3	14.3	14.2	14.8	14.5	15.4	17.1	11.2	10.9	10.1	4		19.6758	1	380.666			1005.9	0.45
1985-11-02	11.3	18.4	2.6	12.4	12.7	13.9	14.3	15.4	17	2.6	2.6	1.9	0		150.462	35	312.574			1009.2	0.99
1985-11-03	7.3	16	-0.7	9.6	10.6	11	12.5	15.4	16.9	-1.4	-1.2	-2	0		158.564	29	287.737			1025	0.66
1985-11-04	9.2	18.9	0.8	10.8	11.5	10.7	11.6	15	16.8	3.2	3	1.4	0		144.675	36	305.552			1026.6	0.84
1985-11-05	13.1	19.8	7.1	13.7	13.7	12.2	12	14.6	16.8	6.6	6.6	6	2.5		107.638	40	339.944			1023.4	0.55
1985-11-06	14.7	16.2	13.2	15	14.7	14	13.3	14.4	16.6	12.2	12.1	11.1	19.5		25.4628	9	382.529			1021	0.82
1985-11-07	16.2	18.2	14.3	16.6	16.4	15	14.1	14.4	16.4	13.9	13.7	12.6	15		31.2498	12	388.694			1011.2	0.74
1985-11-08	16.8	21.3	13.3	17.4	17.2	15.6	14.7	14.6	16.2	13.1	12.6	11.7	0.5		104.166	45	365.25			1003.5	0.64
1985-11-09	16.6	22	11.3	17	17	15.6	14.9	14.8	16.2	10.9	10.4	9.4	0		138.888	45	349.198			1004.3	0.9
1985-11-10	15.5	18.3	13	15.8	15.5	15.5	15	15	16.1	11.3	11.1	10	1		78.7032	26	365.129			1001.1	1.23
1985-11-11	11.8	17.2	5.8	12.9	13.1	14.2	14.5	15.1	16.1	7.6	7.3	6.1	0		94.9068	16	337.132			1002.9	0.5
1985-11-12	10	18.8	3	11.8	12.7	12.2	13	15.1	16.1	2	2	0.6	0		129.629	22	309.007			1002.5	0.83
1985-11-13	7.5	16.3	0.2	9.6	10.3	10.5	11.8	14.8	16.1	-1.6	-1.3	-2.3	0		129.629	17	294.012			1003.5	0.78
1985-11-14	6.9	16	0.4	9.4	10.2	9.7	10.9	14.3	16.1	-1.7	-1.6	-2.7	0		138.888	19	287.175			1005.8	0.89
1985-11-15	7.1	15.1	0.2	9.1	9.6	9.1	10.2	13.9	16	-1.5	-1.5	-2.3	0		135.416	19	289.183			1009.5	0.97
1985-11-16	4.5	11.9	-1.3	6.6	7.9	8.2	9.5	13.4	15.9	-0.3	-0.2	-1.7	0		70.6014	4	306.542			1014	0.61
1985-11-17	5.3	16.7	-1.4	7.4	8.5	7.9	9	13	15.8	1.3	0.9	-0.6	0		81.018	4	306.079			1005.3	0.86
1985-11-18	8.1	16.9	-0.6	9.6	10.3	8.3	8.9	12.6	15.7	0.1	-0.2	-1.4	0		130.786	25	295.426			1003.3	1.01
1985-11-19	7.4	13.7	-0.5	8	8.6	8.6	9.2	12.3	15.5	-1.3	-1.6	-2.7	0		136.573	17	288.164			1009.4	1.04
1985-11-20	8.4	12.3	4.1	8.6	8.6	9.5	9.6	12.2	15.3	2.4	2.4	1.6	0		57.87	9	330.658			1014.1	0.86
1985-11-21	7.5	16.6	1.6	8.9	9.7	9.1	9.7	12.1	15.2	2.1	1.7	0.3	0		122.684	9	297.37			1017.1	0.99
1985-11-22	8.5	16	1.8	9.5	10.3	9.2	9.4	12.1	15	4	3.6	2.4	0		75.231	8	323.579			1014.5	0.75
1985-11-23	13	22.1	7.5	14.2	14.6	11.2	10.6	12	14.9	7.8	7.7	6.5	0		101.851	17	336.114			1004.6	0.72
1985-11-24	8.2	11.6	5.2	8.6	8.9	10.2	10.6	12.1	14.8	4.8	5.1	4.1	16.5		15.0462	2	351.058			1004.3	1.22
1985-11-25	6.3	12.1	-0.5	6.6	6.7	9.3	10.1	12.1	14.7	-1.7	-1.4	-2.3	0		123.842	8	285.857			1007	1.39
1985-11-26	5	12.9	-2.5	6.6	7	7.5	8.8	12	14.5	-3.6	-3.4	-4.2	0		122.684	9	278.888			1014.9	0.95
1985-11-27	5.1	13.3	-2.7	6.4	7	7	8.3	11.7	14.4	-1.9	-2	-3.1	0		124.999	8	279.627			1020	0.95
1985-11-28	6.7		1.7	7	7.3	8	8.3	11.4	14.3	2.6	2.7	1.7	0.5		27.7776	1	336.357			1010.1	0.86
1985-11-29	6.5	11.3	2.1	7.1	7.3	8	8.6	11.3	14.2	0.1	0.3	-0.9	0.5		37.0368	2	329.597			1009.9	1.6
1985-11-30	4.1	9.6	0.2	5	5.5	7.3	8.2	11.2	14.1	-0.4	-0.1	-1.6	1		92.592	11	290.439			1017.1	1.01
1985-12-01	3.2	11.2	-1.8	4.7	5.6	6	7.4	11	14	-1.2	-1.2	-3.1	0		111.11	2	277.237			1015.4	0.98
1985-12-02	6.1	14.8	-1.7	7.8	9.2	5.7	6.9	10.8	13.8	-1.7	-1.3	-2.8	0		104.166	0	291.479			1013.1	1
1985-12-03	7.1	12.6	0.8	8	8.4	6.3	7	10.5	13.7	-0.6	-0.6	-1.8	0		113.425	9	292.133			1021.4	1.15
1985-12-04	6.7	12.6	1.7	7.5	8	7.4	7.7	10.4	13.6	1.7	1.5	0.2	0		97.2216	6	299.957			1015.8	0.9
1985-12-05	8.2	14.2	0.4	9.1	9.6	7.6	7.9	10.3	13.5	1.8	1.6	0.1	0		108.796	12	300.779			1015.5	1.21
1985-12-06	7.9	11.7	3.3	8.2	8.6	7.9	8.1	10.3	13.3	2.1	2	0.9	0		45.1386	-10	331.551			1016.6	1.45
1985-12-07	7.2	8.5	5.7	7.2	7.1	8.3	8.4	10.3	13.2	2.5	2.8	1.7	7.5		23.148	7	340.478			1017.8	1.4
1985-12-08	7.3	9.7	5.3	7.3	7.2	8.9	8.6	10.3	13.1	4.5	4.6	3.4	6		37.0368	30	333.778			1008.3	0.82
1985-12-09	6	11.4	0.4	5.9	5.9	8.3	8.6	10.4	13	-0.9	-0.7	-1.9	0		97.2216	52	292.915			999.8	1.52
1985-12-10	2.2	6.7	-0.9	2.5	2.7	5.7	7.4	10.4	12.9	-7.6	-7.1	-8	0		114.583	1	263.171			1008.3	1.39
1985-12-11	1.2	6.5	-2.6	1.5	1.9	4.2	5.9	10.2	12.8	-6.1	-6	-7.1	0		54.3978	-10	291.943			1011.3	1.05
1985-12-12	1.4	8.4	-3.4	2.4	2.9	3.8	5.3	9.8	12.8	-4.1	-4.2	-5.6	0		106.481	-3	266.304			1008.7	1.04
1985-12-13	1.1	8.9	-4.5	2.4	3.1	3.4	5	9.4	12.7	-3.9	-4	-5.7	0		107.638	-4	264.564			1010.7	1.13
1985-12-14	2.3	12.5	-4.3	5.1	5.9	3.4	4.8	9.1	12.6	-4.3	-4.2	-5.6	0		90.2772	-5	277.342			1003	1.22
1985-12-15	1.1	7	-2.8	2.9	3.5	3.1	4.6	8.8	12.4	-5.3	-5.4	-6.4	0		109.953	0	261.654			998.7	1.02
1985-12-16	-1	5.2	-6.7	0.3	1	2.2	4.1	8.5	12.3	-9	-8.9	-10	0		113.425	-6	249.275			1003.5	0.97
1985-12-17	-0.6	6.2	-6.3	-0.3	0.1	1.8	3.6	8.3	12.1	-9.1	-9	-10	0		105.323	-10	254.566			1002.1	0.99
1985-12-18	-0.2	7.1	-5.9	1.5	2.3	1.6	3.3	8	12	-9.7	-9.6	-10.5	0		112.268	-3	252.101			1014	1.33
1985-12-19	0.3	9.7	-5.5	2	3.1	1.5	3.1	7.7	11.8	-7.8	-7.8	-8.6	0		108.796	-3	256.881			1012.4	1.05
1985-12-20	2	8.4	-5.2	2.7	3.1	1.7	3.1	7.4	11.7	-7.9	-8.1	-9.2	0		111.11	-11	261.998			1017.8	0.55
1985-12-21	0.1	7.6	-5.7	1.9	2.7	1.5	3	7.2	11.5	-8.1	-8.3	-9.3	0		108.796	-3	255.862			1026.6	0.8324
1985-12-22	1	4.4	-4.8	1	1.2	2.1	2.9	7	11.3	-4	-4.4	-5.2	3.5		24.3054	7	308.734			1023.2	0.6304
1985-12-23	5.5	10.3	-0.4	5.6	5.6	4.8	4.2	6.9	11.2	1.7	1.5	0.6	0		68.2866	15	305.937			1008.7	0.6304
1985-12-24		6.8		3.8	4.1	4.3	4.8	7	11	-7.4	-7.2	-8.1	0		112.268	-8				1013.6	1.6404
1985-12-25	0	7.7	-5.2	1.6	2.8	2.3	3.7	7.1	10.9	-6.7	-6.2	-7.5	0		81.018	-3	270.544			1016.7	0.59
1985-12-26	3.7	9.3	-2.7	4.5	4.9	2.6	3.5	7	10.8	-5.1	-5	-6.1	0		106.481	4	272.69			1016.2	0.7516
1985-12-27	3.7	11.7	-3.4	4.4	4.8	3.9	4.2	6.9	10.7	-6.1	-6	-6.9	0		107.638	0	271.256			1013.7	1.2768
1985-12-28	-0.1	7.6	-4.9	2.4	3.6	2	3.5	6.9	10.6	-8.1	-8.1	-9	0		108.796	-4	254.766			1022.6	0.5092
1985-12-29	1.1	9.5	-5.4	1.9	2.9	1.9	3.1	6.8	10.5	-4.7	-4.9	-6	0		98.379	3	267.1			1020.7	0.5496
1985-12-30	7.1	14.5	-1.7	7.5	8	4.1	3.8	6.6	10.4	1	0.8	-0.3	0		79.8606	8	306.235			1009.6	0.8324
1985-12-31	8.6	15.8	4.2	9.1	9.5	6.1	5.4	6.6	10.3	-0.5	-0.5	-1.4	0		78.7032	8	312.138			1000.4	0.8728
1986-01-01	5.3	8.1	2.9	5.8	6.1	6.2	5.8	6.8	10.2	0.6	0.9	0	1.5		35.8794	4	322.55	0.0019		1006.1	0.388
1986-01-02	3.7	9.9	-2.3	4.2	4.6	4.8	5.3	7.1	10.1	-8.1	-7.6	-8.9	0		96.0642	-2	276.35	0.0081		1010.6	1.0748
1986-01-03	-0.5	4.9	-7.2	0.3	1.1	2.7	4.1	7.1	10.1	-8.5	-8.3	-9.9	0		56.7126	-8	281.677	0.0035		1022.8	0.5496
1986-01-04	1.9	8.1	-1.6	2.1	2.5	3.7	4.1	7	10	-2.6	-2.6	-4.4	12.5		53.2404	4	296.19	0.0124		1006.8	0.7516
1986-01-05	1.9	6.1	-3.1	2.1	2.4	3.6	4.1	6.8	10	-7.6	-7.1	-8.7	0		79.8606	-3	278.642	0.0093		996.2	1.4384
1986-01-06	-0.8	5.9	-8	0.6	1.2	1.2	3	6.7	10	-13.2	-12.7	-13.9	0		120.37	-12	243.556	0.0068		1004.8	1.2364
1986-01-07	-1.5	5.5	-6.6	0.7	1.8	0.8	2.4	6.5	9.9	-10.2	-9.9	-11.1	0		93.7494	-7	256.811	0.0089		1011.7	0.59
1986-01-08	-0.4	8.7	-7.1	1.2	2.2	0.7	2.1	6.2	9.8	-6.7	-6.7	-8.5	0		105.323	0	257.383	0.0079		1008.1	0.59
1986-01-09	2.4	7.2	-3	2.9	3.3	1	2.2	6	9.7	-11.8	-11.6	-12.9	0		122.684	-14	255.716	0.008		1010.4	1.6
1986-01-10	-1.6	6.6	-7.6	0.6	1.4	0.6	1.9	5.8	9.6	-10.8	-10.9	-12	0		115.74	-4	245.552	0.0112		1014.7	0.8324
1986-01-11	-2.9	5.2	-9.1	-1.3	0	0.2	1.6	5.6	9.5	-9.6	-9.6	-11.4	0		122.684	-1	238.681	0.0126		1017.1	0.59
1986-01-12	-2	6.9	-9.7	-0.3	1	0.1	1.4	5.4	9.4	-10	-10.1	-11.7	0		124.999	1	240.807	0.01		1019.6	1.0344
1986-01-13	-1.9	3.5	-7.9	-0.9	0	0.1	1.2	5.2	9.3	-8	-8.3	-9.6	0		67.1292	-7	271.539	0.0064		1010.6	0.6708
1986-01-14	2.1	6.2	-2	2.3	2.5	0.1	1.2	5.1	9.2	-11.7	-11.8	-12.9	0		122.684	-10	256.104	0.0127		1007.7	2.4484
1986-01-15	2.7	9.8	-4.2	4.1	4.5	0.2	1.3	5	9.1	-9.3	-9.4	-10.4	0		121.527	1	261.074	0.0087		1012.7	1.5596
1986-01-16	1.1	5.7	-4.8	1.9	2.1	0.3	1.4	4.8	8.9	-4.4	-4.6	-5.5	0		37.0368	7	302.55	0.0003		1014.2	0.7516
1986-01-17	2.9	10.4	-2.7	4.2	4.6	2.3	2.2	4.7	8.8	-2	-2.7	-4.2	0		119.212	12	269.91	0.0087		1010.3	0.7516
1986-01-18	0.5	9.6	-5.3	2.8	3.6	1.8	2.4	4.8	8.7	-4.6	-5.1	-6.7	0		84.4902	-4	275.037	0.0056		1013.7	0.4688
1986-01-19	-0.6	6.7	-7.9	1.5	2.3	0.9	2	4.8	8.6	-6.8	-7.1	-8.4	0		124.999	7	250.491	0.0063		1017.9	0.7516
1986-01-20	-0.4	4.8	-3.9	0.7	1.6	1.3	1.9	4.8	8.5	-4.6	-5.2	-6.3	0		41.6664	3	293.924	0.0042		1014	0.4688
1986-01-21	0.7	6.7	-4.7	1.9	2.5	1.7	2.1	4.7	8.4	-5.2	-5.7	-7	0		92.592	8	272.279	0.0063		1009.2
1986-01-22	0.3	5.7	-4.7	0.8	1.1	2.4	2.6	4.7	8.4	-8.9	-9	-9.8	0		129.629	16	251.062	0.0067		1001.2	0.71
1986-01-23	-0.6	5.8	-7.3	0.5	0.9	1	2.1	4.8	8.3	-10.7	-10.9	-11.7	0		131.944	5	245.896	0.0084		1003.7	1.11
1986-01-24	-1.4	6.4	-7.8	-0.1	0.6	1	1.9	4.7	8.3	-10.6	-10.9	-11.9	0		129.629	9	244.646	0.0137		1010.5	0.73
1986-01-25	-1.2	6.5	-9	0	0.5	0.4	1.6	4.7	8.2	-10.9	-11.1	-12	0		126.157	12	247.176	0.0104		1011.2	0.97
1986-01-26	-1.3	5.6	-7.9	-0.4	0.4	0.5	1.5	4.6	8.1	-11.7	-11.8	-12.7	0		130.786	8	244.636	0.0103		1010.1	0.89
1986-01-27	-1.3	6.1	-9	-0.9	-0.3	0.3	1.4	4.5	8.1	-12.3	-12.5	-13.4	0		137.731	2	241.616	-0.0018		1009.8	0.68
1986-01-28	0.5	7	-6.9	1.2	1.5	0.4	1.3	4.4	8	-9.9	-10.2	-11.2	0		124.999	1	255.978	0.0081		1011.4	1.14
1986-01-29	0	7.7	-6.6	1.4	2.2	0.6	1.4	4.3	7.9	-8.6	-8.9	-10.1	0		133.101	11	251.987	0.0114		1017.4	0.73
1986-01-30	-0.8	5.1	-6.1	0	0.6	0.6	1.4	4.2	7.9	-4.4	-4.9	-6.5	0		52.083	2	288.747	0.0044		1013.7	0.71
1986-01-31	1.7	8.4	-7.9	2.6	3.1	1.6	1.6	4.2	7.8	-3.8	-4.3	-5.7	0		86.805	12	283.258	0.0036		1008.4	1.07
1986-02-01	1.3	4.5	-1.6	1.5	1.6	2.3	2.3	4.2	7.7	-3.7	-4.1	-5	2		92.592	18	279.455	0.0015		1013.2	0.99
1986-02-02	1.8	8	-3	2.4	2.7	2.7	2.6	4.3	7.7	-4.8	-5.3	-6.5	0		135.416	22	262.568	0.0126		1012.3	0.74
1986-02-03	2.3	12.5	-4.5	2.6	3	2.6	2.8	4.4	7.6	-5.8	-6.2	-8	0		137.731	12	263.098	0.0091		1006.7	1.33
1986-02-04	0.7	6.1	-4.8	1.1	1.4	2.5	3	4.5	7.6	-9.8	-10.1	-11.6	0		149.305	10	249.815	0.0108		1011.7	0.97
1986-02-05	-0.3	8.4	-6.9	0.7	1.1	1.9	2.7	4.6	7.6	-10.2	-10.4	-11.8	0		152.777	14	245.037	0.0147		1012.1	1.1
1986-02-06	-1.5	6.1	-7.3	-0.4	0.4	1.3	2.3	4.6	7.5	-12.6	-12.5	-13.6	0		158.564	16	237.322	0.0178		1013.2	0.69
1986-02-07	-0.8	5.5	-8.9	-0.2	0.4	1	2.1	4.6	7.5	-10.8	-11	-12.2	0		156.249	20	242.557	0.0136		1013.7	0.85
1986-02-08	-1.4	2.4	-5.4	-0.3	0.2	1.9	2.3	4.5	7.5	-5.7	-6.3	-7.9	0		76.3884	11	276.863	0.0051		1014.2	0.81
1986-02-09	-0.7	7.3	-7.4	0.4	1.1	0.9	2	4.5	7.5	-9.9	-10	-11.9	0		160.879	13	242.913	0.0154		1013.7	1.01
1986-02-10	-0.2	5.8	-4.5	0.5	0.9	0.9	1.8	4.4	7.5	-10.5	-10.8	-12.2	0		162.036	15	244.429	0.0115		1017.5	1.02
1986-02-11	-0.6	3	-6.7	-0.5	-0.3	0.8	1.6	4.4	7.5	-8.2	-8.6	-10	0		45.1386	4	294.439	0.0019		1013.2	1.38
1986-02-12	1	7.5	-6.8	2.4	2.8	1.8	2	4.3	7.4	-9.5	-9.9	-11.1	0.5		168.98	21	247.987	0.0164		1012.7	0.77
1986-02-13	1.6	10.2	-7	3.3	4.2	1.8	2.2	4.3	7.4	-6.6	-6.2		0		146.99	23	261.383	0.0162		1013	0.55
1986-02-14	4.7	12.4	-3.6	5	5.7	3.4	2.8	4.3	7.3	-2.7	-2.5	-2.6	9		121.527	18	287.214	0.0096		1007.6	1.4
1986-02-15	5.1	6.5	1.6	5.2	5.1	4.6	3.9	4.4	7.3	-1.6	-0.3	-1.3	1		20.8332	1	333.718	0.0005		1003	1.52
1986-02-16	0.1	4.5	-6.8	0.6	1	2.7	3.4	4.7	7.3	-13.1	-11.3	-12.8	0		144.675	16	253.819	0.0136		1010.3	1.47
1986-02-17	-1	8.7	-10.6	0.1	0.8	1.1	2.4	4.8	7.3	-12.4	-10.7	-12.5	0		182.869	27	236.718	0.0185		1019.8	0.75
1986-02-18	-1.2	3.1	-6.7	-0.6	0	1.1	2	4.7	7.3	-6.6	-4.6	-6.5	0		41.6664	6	295.061	0.0231		1017.2	1.18
1986-02-19	0.8	4.2	-1.7	1.1	1.4	1.9	2.1	4.6	7.3	-2.8	-1	-3	13.5		84.4902	-7	287.361	0.0031		1004.4	1.46
1986-02-20	-0.7	5.7	-6.5	0.1	0.9	1.9	2.1	4.5	7.3	-6.9	-3.7	-6.9	1		158.564		251.944	0.0003		1010.3	0.62
1986-02-21	0.7	7.3	-7.1	1.8	2.5	1.8	2	4.4	7.2	-8.9	-1	-7.9	0		192.128	7	244.545	0.002		1008.8	0.74
1986-02-22	1.4	5.9	-3.4	1.6	1.8	1.9	2.1	4.3	7.2	-7.3	-0.1	-6.4	0		157.406	33	260.977	-0.0003		1010.5	1.22
1986-02-23	3.3	9	-0.8	3.9	4.2	3.8	3.1	4.3	7.2	-4.2	3	-3.6	0		177.082	40	264.553	0.0176		1007.1	0.84
1986-02-24	1.9	8.5	-2.9	2.4	2.8	3.7	3.6	4.4	7.1	-8.4	-2.1	-7.6	0		173.61	44	257.371	0.0158		1005.7	1.05
1986-02-25	0.7	5.5	-5.6	1.2	1.4	2.8	3.4	4.6	7.1	-12.6	-9	-11.4	0		195.601	30	242.921	0.0182		1009.4	1.71
1986-02-26	1.7	8.4	-3	2.4	2.7	2.7	3.1	4.7	7.1	-11.8	-10.6	-10.6	0		187.499	32	250.527	0.015		1012.6	1.31
1986-02-27	2	8	-4.6	2.4	2.7	2.7	3	4.7	7.1	-5.9	-5	-4.9	0		113.425	22	282.483	0.0058		1009.6	1.57
1986-02-28	1.4	5.2	-3.9	1.9	2	3.4	3.3	4.7	7.1	-6.5	-5.3	-4.9	2		78.7032	2	293.191	0.0129		1001.5	1.28
1986-03-01	2.8	10	-4.4	3.7	4	3.2	3.3	4.7	7.1	-8.8	-7.8	-7.1	0		189.814	46	257.825	0.0172		1009	1.02
1986-03-02	1.8	8.6	-3.7	2.6	3	3.7	3.8	4.7	7.1	-7.1	-6.3	-6	0		179.397	37	259.334	0.0196		1005	0.76
1986-03-03	2.4	10.6	-4.9	3.5	3.8	3.3	3.7	4.9	7.1	-10.8	-10.3	-9.2	0		193.286	39	254.725	0.0194		1004.4	1.99
1986-03-04	1	6	-6.1	1.2	1.3	3	3.5	4.9	7.1	-9.5	-10.1	-7.9	0		203.702	51	247.999	0.0144		1015.6	1.41
1986-03-05	1.9	7.3	-0.4	2.1	2.2	4.3	4	4.9	7.1	-2.2	-2.9	-0.7	4.5		111.11	26	287.3	-0.0052		1010.2	0.86
1986-03-06	2.2	6.1	-2	2.5	2.7	3.9	4	5	7.1	-4.2	-4.6	-1.7	0.5		156.249	45	272.786	0.004		1020.8	1.58
1986-03-07	4.4	10.9	1	5	5.2	5.3	4.6	5.1	7.1	-2.4	-3.3	-0.9	0		148.147	40	286.262	0.016		1023	0.67
1986-03-08	5.3	12	-3.8	5.8	5.9	5.5	5.1	5.3	7.1	-2.9	-3.6	-1	0		201.388	43	273.396	0.0108		1024.1	1.4
1986-03-09	8.8	17.3	-1	9.6	9.7	7.3	6.1	5.5	7.1	0.7	-0.1	1.9	0		190.971	48	295.39	0.016		1021.3	1.08
1986-03-10	9.3	16.5	3.3	10.3	10.6	7.5	6.6	5.8	7.2	5.1	4	5.3	0		60.1848	12	343.215	0.0022		1012.3	1.24
1986-03-11	5.3	8.5	1.5	5.6	5.7	6.4	6.3	6.1	7.2	1.5	0.8	2.6	11		24.3054	5	335.632	-0.0032		1008.1	1.86
1986-03-12	5.3	12.2	-0.5	6	6	6.7	6.1	6.3	7.3	-1.1	-1.9	-0.4	1		158.564	39	289.759	0.0208		1009	0.93
1986-03-13	6.1	14.2	-2.8	7.2	7.6	6.7	6.3	6.3	7.3	-3	-3.5	-2.3	0		201.388	51	278.849	0.0161		1014.8	1.16
1986-03-14	4.2	6.1	0.7	4.1	4	6.1	6.3	6.5	7.4	-0.7	-1.1	0	7.5		52.083	21	320.528	0.0425		1018.5	2.4
1986-03-15	3.4	5.4	0.4	3.3	3.2	5	5.2	6.5	7.4	-0.2	-0.7	0	10		38.1942	23	321.846	0.0284		1011.7	1.71
1986-03-16	9	16.4	3.8	9	8.7	8.8	6.8	6.4	7.4	3.7	9.4	4.3	2		163.193	71	310.421	0.0174		999.6	1.13
1986-03-17	5.5	10.3	-1.3	5.8	5.9	7.6	7.6	6.6	7.5	-8.3	-3.5	-6.5	0		226.85	67	265.813	0.0193		1004.8	2.03
1986-03-18	4.2	9.8	-4.1	5.2	5.5	6.4	6.4	6.8	7.5	-6.9	-6.8	-5.8	0		162.036	42	282.02	0.0163		1009.6	0.93
1986-03-19	7.1	8.9	5	7.1	7	7.9	7	6.9	7.6	3.8	3.7	3.9	55.5		30.0924	16	343.265	0.0274		1000.7	1.03
1986-03-20	8	12.2	3.9	8.1	8.1	8.3	7.8	7	7.2	-3.1	-2.9	-3.1	1.5		173.61	65	297.778	0.0561		994.5	2.49
1986-03-21	5.8	11.7	1.1	6.2	6.3	7.1	7	7.2	7.3	-5.9	-5.9	-6.2	0		217.591	59	273.889	0.0203		1009.7	1.07
1986-03-22	4.4	7	2.3	4.4	4.4	6.3	6.7	7.2	7.4	-2.4	-2.4	-2.9	1.5		43.9812	13	324.906	0.0001		1015.3	1.6
1986-03-23	2	3.8	0	2	2	3.6	4.6	6	6.2	-2.3	-2.3	-5.5	36		17.361	9		-0.0001			3.67
1986-03-24	5.9	10.1	-0.8	6.3	6.4	5.5	5.2	6.8	7.1	-5.3	-5	-7.1	3.5		156.249	66	294.076	0.0085		999.7	1.12
1986-03-25		10.6		3.5	3.9	6	5.9	6.6	7.1	-7.9	-7.3	-8.7	0		230.323	69		0.0038		1014	0.59
1986-03-26						5.6	5.2	5.6	6.1	-4.3	-4.2	-3.5	0		240.739	72		0.0186		1020.1	1
1986-03-27						7.9	7	6.6	7.3	-2.4	-2.6	-2	0		233.795	70		0.004		1018.5	0.32
1986-03-28			0	1.2	1.2	6.7	7	6.8	7.4	0	-1.3	1	11.5		42.8238	15		-0.0025		1014.8	1.4384
1986-03-29	5.8	9.5	2.6	5.9	5.8	9.7	5.8	6.1	6.5	0.7	0.5	1.9	2		87.9624	33	319.396	0.0054		1007.2	1.2
1986-03-30	5.9	10.4	-0.5	6.1	6.3	7.2	6.6	7	7.5	2.6	2.3	3.4	0.5		75.231	34	324.59	0.0065		1008.4	0.81
1986-03-31	9	15.4	1.7	9.4	9.4	9.5	8.3	7.1	7.6	-1.1	-0.9		0		141.203	47	317.523	0.0139		1004.4	0.98
1986-04-01	6.5	12.8	-1.9	7.4	7.8	8	7.7	7.4	7.7	-4.7	-4.3		0		211.804	70	284.213	0.0129		1014.1	1.13
1986-04-02	12.5	18	3.9	12.8	12.7	10.7	9.1	7.5	7.8	-1.4	-1.4		0		237.267	76	306.467	0.0182		1015.2	1.39
1986-04-03	7.8	10.8	4.5	7.7	7.5	9.4	9.1	7.8	7.9	0.2	0.1		0		157.406	56	309.675	0.0095		1020.8	1.94
1986-04-04	9.2	11.3	6.9	9.3	9.2	9.9	9.1	8.1	8				8		30.0924	14		-0.0027		1010.1	0.74
1986-04-05	12.4	19.7	8.7	12.3	12.1	11.7	10.4	8.3	8.1	-1	-4.5	-10.8	0		203.702	78	316.566	0.0167		1002.3	1.65
1986-04-06		15.9	0.3	5.6	4	10.2	9.9	8.6	8.2	-5.6	-6.2	-5.6	0		219.906	57		0.0136		1005.2	1.38
1986-04-07			-0.5	3.4	3.5	9.3	9.4	8.8	8.3	-6.1	-6.2	-6.6	0			59		0.0189		1010	1.99
1986-04-08	7.6	16	-2.4	8.4	8.7	9.2	8.8	8.8	8.4	-5.5	-6.1	-6.1	0		253.471	72	279.781	0.0173		1018.3	1.21
1986-04-09	12.9	22.1	2.8	13.4	13.8	11.6	10	8.7	8.5	1.8	0.9	0.9	0		239.582	78	314.47	0.0155		1015.1	1.33
1986-04-10			10.4	17.2	17.3	12.7	11.2	9	8.6	9.5	8.5	8.4	7		90.2772	33		-0.0044		1005.3	2.02
1986-04-11		13.7		8.4	8.4	11.8	11.2	9.4	8.8	7.1	6.2	6.3	5		41.6664	18		-0.0025		1000	1.36
1986-04-12	8.6	15.1	0.8	9.2	9.3	10.9	10.6	9.6	8.9	-6.6	-7.2	-6.2	0		277.776	86	278.017	0.015		1009.9	1.84
1986-04-13	9.6	17	0.6	10.2	10.5	11.1	10.5	9.7	9	-2.2	-3.2	-2.8	0		273.146	79	288.665	0.0223		1016.5	0.96
1986-04-14	9.2	16.4	2.4	9.9	10.1	10.5	10.5	9.8	9.1	-1.2	-1.9	-2.1	0		249.998	82	294.165	0.012		1020.2	1.82
1986-04-15	10.1	12.9	6.6	10.1	10	10.9	10.3	9.9	9.2	3.6	3	3.1	19		47.4534	16	354.949	-0.0105		1013.1	0.97
1986-04-16	12.4	17	6.5	12.4	12.2	13.4	11.9	10	9.3	-0.4	-0.9	-0.4	6		270.832	101	304.078	0.0168		1005.4	1.79
1986-04-17	8.4	12.2	5.7	8.4	8.2	10.8	10.9	10.2	9.4	-1.1	-1.9	-1.7	0		138.888	48	319.687	0.0114		1017.1	1.38
1986-04-18	11.3	16.6	4.8	11.6	11.7	11.8	11	10.3	9.5	4.9	4	4.1	0		107.638	29	345.518	0.0071		1016.6	0.84
1986-04-19	12.6	15.5	10.8	12.6	12.4	12.8	11.7	10.4	9.6	8.3	7.4	7.6	1		79.8606	32	360.908	-0.0006		1016.4	1.53
1986-04-20	13.9	16.6	12.3	13.8	13.6	13.9	12.4	10.6	9.7	8.2	7.2	7.4	0		131.944	56	354.92	0.0049		1015.8	2.04
1986-04-21	15.2	18.7	12.3	15.1	14.9	14.8	13.2	10.8	9.8	8.8	7.7	7.9	0		151.619	50	357.517	0.0083		1017.2	1.59
1986-04-22	13.6	16.8	12.4	13.7	13.5	14.2	13.3	11.2	9.9	9.5	9.1	8.8	6.5		79.8606	37	366.859	-0.0209		1017	2.2
1986-04-23	15	21.1	7.9	15.1	14.9	15.6	14.1	11.5	10.1	10	9.9	9.1	16		216.434	91	344.22	0.0123		1008.3	1.58
1986-04-24		17.4		11.2	12.2	14.8	14.2	11.8	10.2	5.3	5	3.9	0		263.887	90		0.0185		1014.4	1.41
1986-04-25		17.7	10.8	13.9	14	16	14.6	12.1	10.3	8.5	8.1	7.6	0		138.888	45		0.0115		1013.1	0.99
1986-04-26				13.3	13.5	16.1	14.9	12.4	10.5	9.8	9.6	8.5	0		203.702	73		0.0127		1012.2	2.03
1986-04-27				12.8	12.3	16.9	15.3	12.7	10.6	10.2	10.7	9.3	0		197.915	78		0.0064		1006.9	2.78
1986-04-28	12.3	18.2	8.1	12.4	12.5	15.2	15.1	13	10.8	9.5	9.6	8.7	18.5		23.148	6	374.13	-0.0103		1006.8	2.29
1986-04-29	12.1	16.7	8.3	12	11.8	15	14.3	13.2	11	4.7	4.8	4.2	0.5		240.739	86	320.089	0.0186		1015.6	1.43
1986-04-30	12.4	18.7	5.5	12.9	13.2	15.1	14.6	13.2	11.2	2.6	2.6	1.7	0		296.294	86	307.206	0.0225		1020.8	1.02
1986-05-01	14.6	21	5.7	14.8	15.1	15.9	14.8	13.3	11.3	5.6	5.5	4.9	0		255.785	86	329.973	0.0166		1018.2	1.11
1986-05-02	16.2	18.3	13.5	16.4	16.3	16.6	15.4	13.4	11.4	10.3	10.3	9.5	0		77.5458	27	382.067	0.004		1009.3	0.79
1986-05-03	14.4	17	10.8	14.8	14.9	15.9	15.3	13.6	11.5	5.9	6.1	5.5	0		77.5458	22	370.851	0.0022		1013.8	0.96
1986-05-04	13.9	19.5	8.8	14.2	14.4	15.4	14.7	13.7	11.7	7.1	7.1	6.3	0		124.999	31	357.541	0.0088		1013.9	0.69
1986-05-05	14	20.2	7.6	14.4	14.5	15.7	14.9	13.6	11.8	7.3	7.1	6.3	0		190.971	65	343.671	0.0113		1014	1.3
1986-05-06	15.1	18.3	12	15.1	15	16.5	15.4	13.7	11.9	9.8	9.8	9.1	19		129.629	50	364.668	0.0079		1006	1.57
1986-05-07	18.1	24.3	13.6	18.2	18	18.8	16.7	13.9	12	9.3	9.3	8.8	0		291.665	105	345.878	0.0144		1001.2	1.02
1986-05-08	19.1	27.4	10.8	19.6	19.8	19	17.4	14.2	12.1	9.1	8.9	8.1	0		278.933	86	353.127	0.0266		1007.1	1.01
1986-05-09	19	25.3	13.5	19.4	19.4	19.2	17.8	14.6	12.2	10.8	10.5	9.9	0		288.193	98	353.933	0.0083		1001.7	1.93
1986-05-10	13.9	19	11.5	14.1	14.1	17.5	17.2	14.9	12.4	5.2	4.9	4.4	0		282.406	105	322.368	0.0128		1007.4	1.79
1986-05-11	14.5	17	10.8	14.4	14.2	17	16.5	15.1	12.5	8.8	8.4	8	0		74.0736	28	373.878	0.0088		1006.5	0.75
1986-05-12	13.6	16.1	8	13.8	13.6	16.3	16.1	15.1	12.6	6.9	6.6	6.2	0		141.203	50	353.032	0.001		1010.4	1.82
1986-05-13	13.3	18	7.6	13.6	13.7	16.2	15.7	15	12.8	4.7	4.6	4.3	0		261.572	88	323.875	0.0108		1016.3	1.62
1986-05-14	15.3	20	10.7	15.3	15.3	16.7	16.1	15	12.9	9.4	9.1	8.7	25		144.675	55	362.945	0.0038		1008.3	2
1986-05-15	15.5	20	11.6	15.4	15.2	17.5	16.6	15.2	14	11.4	11	10.7	32.5		99.5364	60	374.846	0.0028		992.3	2.08
1986-05-16	13.9	18.8	10.8	13.9	13.8	17	16.3	15.4	14	7.9	7.6	7.4	7.5		159.721	70	351.553	0.0058		998.7	1.22
1986-05-17	15.6	22.5	7.5	16	16.2	17.9	16.7	15.4	13.9	7.6	7.1	6.6	0		300.924	123	331.504	0.022		1007.6	0.89
1986-05-18	17.3	24.4	9.9	17.9	17.9	18.6	17.4	15.5	13.8	10.1	9.6	9.1	0		244.211	99	354.316	0.0152		1011.7	0.75
1986-05-19	18.4	22	14.2	18.8	18.9	18.3	17.5	15.7	13.8	13.1	12.6	12.1	0		75.231	24	396.581	-0.0019		1004.2	1.16
1986-05-20	16.7	19.8	13.5	16.7	16.6	17.9	17.3	15.9	13.8	12.9	12.6	12.2	11		32.4072	12	396.359	-0.0073		995.8	1.65
1986-05-21	12.3	15.4	9.8	12.4	12.5	16	16.2	15.9	13.9	7.9	7.9	7.7	2		56.7126	20	366.631	-0.003		1002.2	1.2
1986-05-22	13.3	17.3	9.5	13.3	13.1	16.4	15.8	15.8	13.9	5.8	5.6	5.6	0		199.073	76	339.065	0.012		1006.6	0.98
1986-05-23	13.9	19.1	8.3	14	13.9	17.2	16.4	15.7	14	5.5	5.2	5	0		288.193	118	323.8	0.016		1009.7	1.2
1986-05-24	16.7	21.7	10.9	16.9	17	17.7	16.7	15.7	14	8.8	8.5	8.2	0		201.388	87	358.526	0.0065		1005.8	1.48
1986-05-25	17.6	24.2	8.7	18.6	18.8	18.1	17.3	15.8	14	3.5	3.5	3.8	0		225.693	90	351.556	0.0107		1002.1	1.22
1986-05-26	13.4	19	7.4	14.3	14.7	17.2	16.8	16	14.1	0.9	1.1	1.6	0		303.239	125	312.461	0.0154		1008.8	1.08
1986-05-27	15.1	23.5	5.6	15.8	16.3	17.4	16.8	16	14.1	3.5	3.6	3.4	0		306.711	114	323.194	0.0014		1012	1
1986-05-28	17.9	24.1	11.3	18	18	18.6	17.5	16.1	14.1	8.6	8.2	7.9	0		302.081	120	345.303	0.0125		1012.3	1.44
1986-05-29	18.2	22.5	14.6	18.3	18.2	18.8	17.9	16.3	14.2	12.1	11.8	11.5	3		133.101	57	383.587	0.0048		1008.6	1.13
1986-05-30	16.7	17.6	15.8	16.7	16.6	18.2	17.6	16.5	14.3	13.5	13.1	12.8	32.5		49.7682	27	393.018	-0.0032		995	1.48
1986-05-31	20.3	27.2	15.8	20.1	19.9	21.2	19	16.6	14.5	13.4	13	13	1.5		295.137	149	366.73	0.0166		998.1	1.26
1986-06-01	21.1	26.7	16.5	21.1	21	21.6	19.9	16.9	14.5	14.7	14.1	13.9	0		199.073	94	389.531	0.0103		1006.5	0.88
1986-06-02	21.8	27.9	16.8	22.1	22	22.3	20.6	17.2	14.6	15.3	14.9	14.5	0		249.998	114	385.606	0.012		1006.5	0.89
1986-06-03	19	21.8	16.4	19.2	19.1	20.8	20.1	17.6	14.7	15.1	14.6	14	0		78.7032	28	400.599	0.0012		1005.2	0.97
1986-06-04	15.7	18.4	13.4	15.6	15.4	19.6	19.3	17.8	14.8	10.8	10.5	10	0		199.073	96	357.212	0.0044		1008.7	2.03
1986-06-05	15	19.8	12.4	14.8	14.5	19.2	18.8	17.8	14.9	7.3	7	6.8	0		267.359	116	336.786	0.0056		1014.1	2.14
1986-06-06	14.6	16.7	10.7	14.7	14.6	17.7	17.9	17.7	15.1	9.3	9	8.6			56.7126	22	379.397	0.0018		1008.6	1.23
1986-06-07	16.9	19.9	15	16.8	16.7	18.8	18	17.6	15.2	12.5	12.2	11.9	5.5		79.8606	40	387.834	0.0106		1000.5	0.74
1986-06-08	18.7	24.6	13.8	19.1	19.2	19.9	18.7	17.5	15.2	13.3	13.1	12.7	1.5		232.637	101	369.634	0.0128		1003.2	0.76
1986-06-09	20.4	27.7	12.5	21	21.2	20.7	19.3	17.6	15.3	12.8	12.4	11.7	0		282.406	126	369.06	0.0231		1004.3	0.98
1986-06-10	18.1	22	12.9	18.3	18.2	20	19.5	17.8	15.3	6.6	6.5	6.4	0		202.545	83	364.039	0.0013		1011.1	1.4
1986-06-11	17.2	23.8	10.5	17.8	18	19.4	18.9	17.9	15.4	6.9	6.7	6.5	0		312.498	121	338.462	0.009		1013.6	1.37
1986-06-12	17.3	24.3	9.1	18.4	18.9	19.4	18.9	18	15.5	6.3	6.1	5.7			319.442	126	336.81	0.0151		1017.6	0.83
1986-06-13	18.7	26.2	10.1	19.4	19.9	19.9	19.1	18	15.5	9.5	9.3	8.8	0		297.452	121	352.863	0.0171		1016.4	0.7
1986-06-14	18.7	24.2	12.6	19.7	19.9	19.8	19.3	18.2	15.6	10.7	10.4	9.9	0		200.23	75	372.484	0.0077		1013.7	0.75
1986-06-15	20.8	26.6	13.6	21	21	20.7	19.6	18.2	15.7	11.9	11.5	11.1	0		303.239	131	366.373	0.0314		1010.3	1.47
1986-06-16	21.6	25.6	16.8	21.7	21.5	21.2	20.1	18.4	15.7	13.3	12.9	12.7	0		189.814	83	392.709	-0.0014		1008.8	1.61
1986-06-17	21.3	23	19	21.3	21.2	21.4	20.3	18.6	15.8	17.9	17.7	17.2	16		59.0274	27	418.417	-0.0088		1004.6	1.14
1986-06-18	21.6	22.6	19.8	21.6	21.4	22.2	20.9	18.7	15.9	18	17.5	17.4	20.5		94.9068	52	413.946	-0.006		999.2	1.95
1986-06-19	21.7	25.9	17.6	21.7	21.6	22.8	21.4	19	16	16.3	15.7	15.7	15		255.785	129	386.475	0.0088		1001.2	1.24
1986-06-20	20.8	25.8	17.4	20.7	20.5	22.7	21.6	19.3	16.2	14.5	13.9	14.2	0.5		263.887	131	377.513	0.0125		1004.4	1.42
1986-06-21	17.3	18.1	16.8	17.4	17.2	20.5	20.6	19.5	16.3	12.7	12.1	12.1	0.5		28.935	10	400.697	-0.0024		1008.1	0.91
1986-06-22	20	23.9	16.5	19.8	19.7	21.5	20.4	19.5	16.4	14.1	13.3	13.4	0		194.443	92	384.505	0.0127		1007.9	0.78
1986-06-23	20	23.1	17.2	20	19.9	21.3	20.6	19.4	16.5	15.9	15.1	15	0		94.9068	39	403.866	0.0018		1009.8	0.85
1986-06-24	20.2	23.1	18.1	20.1	19.9	21.7	20.8	19.4	16.6	16	19.7	15.3	1.5		128.471	64	399.104	0.0078		1009.4	1.05
1986-06-25	21.1	23.3	19.2	21	20.9	21.8	20.9	19.5	16.7	18.2	21.1	17.4	10		70.6014	38	415.443	0.0003		1004.9	0.98
1986-06-26	22	28.2	17.3	21.9	21.9	23.1	21.7	19.5	16.7	17.4	17.8	16.7	4.5		216.434	104	395.813	0.0131		994.5	1.19
1986-06-27	18.6	21.7	14.6	18.9	19	21.3	21	19.8	16.8	13.5	14.9	12.7	0		201.388	88	375.187	0.0043		1002.8	1.36
1986-06-28	18.1	19.8	17.3	18	17.8	20.6	20.4	19.8	16.9	13.5	13.9	12.6	0		87.9624	44	393.395	-0.0028		1003.3	1.82
1986-06-29	15.9	16.8	14.9	15.9	15.8	19.4	19.6	19.7	16.9	12.4	13.1	11.9	11		57.87	30	387.059	-0.0037		1000.5	1.68
1986-06-30	17	18	15.5	16.9	16.8	19	18.9	19.5	17.2	14.3	15.8	13.7	23		47.4534	24	395.559	-0.0136		998.7	0.76
1986-07-01	19.9	25.7	17	19.6	19.5	20.9	19.8	19.2	17.4	15.1	16.8	14.5	2.5		204.86	119	383.332	0.0118		999.2	1.34
1986-07-02	16.6	17.3	15.8	16.6	16.5	19.5	19.5	19.3	17.3	13.5	14.6	12.8	13.5		49.7682	29	392.749	-0.0319		1002.8	1.87
1986-07-03	17.6	20	15.8	17.5	17.4	19.5	19.1	19.3	17.4	12.7	13.4	12.1	2		109.953	66	385.961	-0.0311		1004	1.66
1986-07-04	18.8	21.5	16.2	18.7	18.6	19.9	19.3	19.1	17.4	13.7	14.4	13	1		89.1198	52	397.09	0.0044		1009.2	0.79
1986-07-05	21.4	25.7	18.3	21.4	21.3	21.3	20.1	19.1	17.3	17	16.9	16.3	10		114.583	64	408.848	0.0046		1007.4	0.84
1986-07-06	22	26.8	19.3	21.8	21.6	22.3	20.9	19.2	17.3	17.8	17.6	17.1	3		138.888	81	408.666	0.008		999.2	1.27
1986-07-07	19.4	20.8	18.5	19.4	19.2	21.2	20.7	19.5	17.3	15.2	15.2	14.3	0		52.083	27	408.136	-0.002		1006.7	1.23
1986-07-08	21.6	25.2	18	21.6	21.5	22	20.8	19.5	17.3	15.9	15.8	15.1	0		188.656	102	396.222	0.0105		1010.2	0.83
1986-07-09	22.2	25.3	18	22.3	22.3	22.3	21.2	19.7	17.3	17.8	17.1	16.9	0		122.684	59	412.582	0.005		1010.8	0.67
1986-07-10	22.6	26.5	19.6	22.8	22.8	22.6	21.5	19.8	17.4	19.1	18.1	18.2	2.5		89.1198	42	421.303	0.0047		1008.5	0.62
1986-07-11	20.3	21.6	19.5	20.2	20	22	21.4	19.9	17.4	16.9	16	16	0		76.3884	44	409.304	-0.0041		1012	1.74
1986-07-12	20.6	22	19.3	20.5	20.4	21.7	21.1	20	17.5	17.7	16.6	16.7	0.5		59.0274	36	414.362	-0.0007		1010.3	1.15
1986-07-13	22.6	26.4	19	23	23	22.6	21.5	20	17.5	19.4	18.3	18.4	2		93.7494	44	420.666	0.004		1005	0.73
1986-07-14	23.4	28.7	18.5	23.5	23.4	23.2	21.8	20	17.5	17.9	16.9	17.2	0		230.323	124	402.016	0.0019		1006.8	1.19
1986-07-15	21.3	24.4	19.1	21.3	21.2	22.7	22	20.2	17.6	18.5	17.9	17.7	10.5		52.083	28	419.751	-0.0047		1005.7	1.44
1986-07-16	21.1	24.8	19.1	21	20.9	22.2	21.5	20.4	17.6	18.3	17.5	17.7	7.5		62.4996	33	416.737	0.0008		1006.2	1
1986-07-17	20.7	22.2	19.6	20.6	20.5	22	21.4	20.4	17.7	17.6	17.1	16.8	3		64.8144	39	413.767	-0.0013		1004.3	1.35
1986-07-18	25	31.8	20.2	24.9	24.7	24	22.2	20.4	17.8	20.4	19.6	19.8	1.5		229.165	131	414.904	0.0366		998.2	0.68
1986-07-19	23.9	29.6	19.3	24	24	24.5	23.2	20.6	17.8	18.3	17.4	17.4	0			113		0.0075		1003.3	1.34
1986-07-20	19.1	21	17.5	19	18.8	22.1	22.1	20.8	17.9	13.8	13.1	13.1	0		86.805	47	398.943	-0.0022		1008.5	1.62
1986-07-21	18.3	19.8	16.6	18.2	18.1	21	21.1	20.8	18	14.5	14	13.9	2		63.657	33	399.407	-0.0075		1008.6	1.12
1986-07-22	19.7	21.6	17.7	19.7	19.5	21.1	20.7	20.7	18	17.3	16.6	16.5	18		37.0368	18	412.982			1005.7	0.67
1986-07-23	23.8	28.8	19.7	23.5	23.3	23.3	21.7	20.5	18.1	18.8	18	18.3	1		226.85	130	405.653	0.0145		1001.7	0.93
1986-07-24	23.5	26.7	20.3	23.6	23.5	23.8	22.6	20.6	18.2	16.8	16.1	16.3	0		233.795	123	399.614	0.0055		1006.7	1.11
1986-07-25	22.3	24.9	20.2	22.2	22	23.3	22.5	20.9	18.2	16.8	16.2	16	0		145.832	80	407.73	0.0001		1009.6	1.4
1986-07-26	23.6	27.6	20.6	23.5	23.4	23.7	22.6	21	18.2	18.7	18.4	17.9	0		162.036	83	414.393	0.0035		1010.7	1.05
1986-07-27	25.2	29.6	22.1	25.2	25.1	24.5	23.2	21.1	18.3	20.5	20.4	19.6	0		158.564	80	426.184	0.0055		1011.2	0.84
1986-07-28	26.2	31.8	20.9	26.4	26.4	24.9	23.5	21.3	18.3	20.6	20.4	19.7	0		188.656	98	427.562	0.0062		1011.2	0.64
1986-07-29	27.1	33.3	21.4	27.3	27.3	25.6	24.1	21.5	18.4	20.9	21.5	20	0		244.211	123	425.33	0.0348		1010.9	0.64
1986-07-30	26.7	32.5	21.7	27	27.1	25.7	24.4	21.7	18.4	20	22.2	19.2	0		238.424	117	422.027	0.017		1010.9	0.79
1986-07-31	26.7	32.8	21.5	27.1	27.2	25.8	24.5	21.9	18.5	20.2	22.4	19.3	0		256.943	125	419.76	0.0225		1011.7	0.67
1986-08-01	25.6	31.1	20.8	25.9	26	25.5	24.5	22.1	18.6	20.2	21.8	19.2	0		255.785	124	413.733	0.0129		1012.4	0.85
1986-08-02	24	27.7	20.5	24	23.8	25.3	24.4	22.3	18.7	18.8	20.5	18	0		225.693	97	406.487	0.004		1011.9	1.22
1986-08-03	23.2	27.8	18.8	23.4	23.4	24.6	24	22.3	18.8	17.4	17.2	16.6	0		232.637	107	398.421	0.0077		1007.3	1.02
1986-08-04	20.7	23.7	19.1	20.9	20.8	22.2	22.7	22.3	19.3	17.4	16.7	16.8	181.5		28.935	11	420.002	0.0322		995.8	1.61
1986-08-05	25.3	32.7	20.8	25.4	25.3	23.9	22.5	22.2	21.1	18.7	17.9	18.3	61.5		244.211	136	409.546	0.0176		984.9	1.14
1986-08-06	26	32	20.3	26	26	25.1	23.8	22.1	21.1	17.4	16.8	16.7	16		254.628	131	409.482	0.0164		997	0.81
1986-08-07	25.2	29.4	22.3	25.2	25	25.3	24.2	22.4	20.9	17.4	19.8	18.1	0			107		0.005		1002.7	1.25
1986-08-08	22.8	25.6	21.8	22.8	22.6	24.3	23.8	22.6	20.7	17.7	21.8	17.5	1		105.323	54	417.745	-0.0006		1007.7	1.07
1986-08-09	23.8	27.4	21.5	23.7	23.5	24.6	23.8	22.6	20.5	18.2	20.9	17.9	0		182.869	95	410.524	0.0011		1011.4	1.62
1986-08-10	26.2	31.4	22.1	26	25.9	25.8	24.4	22.6	20.4	19.8	21.5	19.6	0		243.054	124	417.233	0.0114		1013.7	0.92
1986-08-11	26.2	31.4	21.6	26.4	26.5	25.8	24.8	22.8	20.3	19.8	21.4	19.4	0		219.906	105	420.496	0.0106		1011.7	0.67
1986-08-12	25.8	30.6	21.8	25.9	25.8	25.6	24.7	22.9	20.2	18.7	20.6	18.6	0		178.24	80	422.851	0.0009		1008.3	0.97
1986-08-13	26.2	30	22.9	26.2	26.1	25.7	24.8	23	20.2	19.9		19.7	0		165.508	80	428.829	0.0008		1007.9	1.15
1986-08-14	26.8	31	23.4	26.8	26.7	26.1	25	23.1	20.2	19.3		19.2	0		222.221	104	422.217	-0.0005		1010.2	1.29
1986-08-15	25.9	29.9	22.9	26.1	26.1	25.8	24.9	23.2	20.2	19.5		19.4	0		156.249	71	427.956	0.0022		1010.3	0.84
1986-08-16	26.4	31.1	22.6	26.4	26.4	25.9	25	23.2	20.2	19.4		19.3	0		196.758	99	423.882	0.0086		1007.9	0.71
1986-08-17	25.2	29.1	22.5	25.2	25.1	25.8	25	23.3	20.3	19.3		19.2	0		179.397	92	419.618	0.0079		1006.5	1
1986-08-18	23.4	24.8	22.5	23.4	23.3	24.9	24.6	23.3	20.3	19		18.8	0		71.7588	34	427.593	-0.0031		1005.6	1.02
1986-08-19	22.7	24.4	19.5	22.9	22.9	24.2	24	23.3	20.3	18.1		17.7	0		56.7126	21	425.92	-0.0005		1004	0.68
1986-08-20	24.9	30.7	19.6	25.1	25.1	24.7	23.9	23.1	20.4	19.3		19.1	0		159.721	81	420.701	0.0126		998.8	0.44
1986-08-21	25.7	32.4	21.9	25.7	25.6	25.4	24.4	23	20.4	19.7		19.5	0		189.814	99	420.727	0.0076		998.9	1.13
1986-08-22	23.7	26.7	21.3	23.5	23.3	25	24.4	23	20.4	18.1		17.8	0		190.971	96	406.968	-0.001		1007.4	2.11
1986-08-23	22.4	24.1	19.8	22.4	22.2	23.9	23.9	23.1	20.4	14.9		14.6	0		74.0736	33	418.977	-0.0053		1010.6	1.56
1986-08-24	22	26.5	17.9	21.9	21.7	23.6	23.3	22.9	20.4	13.5		13.6	0		248.841	112	379.562	0.0174		1010.6	1
1986-08-25	23.5	29.7	16.7	23.7	23.9	23.9	23.4	22.8	20.4	16.9		16.5	0		256.943	116	392.352	0.0249		1012	0.67
1986-08-26	24.3	30	18.4	24.5	24.5	24.4	23.7	22.7	20.4	18.7		18.1	0		217.591	104	406.383	0.002		1010.8	0.59
1986-08-27	26.1	31.7	21.2	26.2	26.3	25.4	24.3	22.7	20.4	20.3		19.9	0		206.017	101	420.916	0.0031		1008.3	1.35
1986-08-28	26.6	32	21.7	26.6	26.6	23.1	22.6	21.2	19	18.7		18.5	0			84		0.0055		1006.2	1.17
1986-08-29	26.6	31.3	22.4	26.6	26.5	25.9	24.7	22.9	20.3	20.4		20.1	0		201.388	92	424.204	-0.002		1002.9	1.9
1986-08-30	27.2	31.1	24.6	27.3	27.1	26.3	25.1	23	20.3	20.5		20.2	0			79		-0.0015		1002.1	1.75
1986-08-31	25.2	31.3	19	26.3	26.6	25.3	24.8	23.1	20.3	17		16.7	0		217.591	91	407.218	0.0158		1006.5	0.53
1986-09-01	24	30.1	18.7	24.2	24.2	24.5	24.1	23.1	20.4	18.5		17.9	0		207.175	92	405.144	0.0177		1010.8	1.12
1986-09-02	24.4	25.6	22.4	24.5	24.4	24.9	24.2	23.1	20.4	21.1		20.9	19		64.8144	35	435.002	0.0316		1005.9	1.58
1986-09-03	25.6	27.5	22.9	25.9	25.8	25.5	24.7	23.1	20.7	22.6		22.2	53.5		55.5552	24	444.324	0.0013		997.5	1.31
1986-09-04	27.1	34.7	20.2	27.7	27.9	25.6	24.7	23.2	20.9	17.6		18	0.5		246.526	118	412.74	0.0278		1003.7	0.79
1986-09-05	25.2	30.4	20.4	25.6	25.6	25.4	24.9	23.3	20.9	17.2		17.4	0		207.175	95	408.631	0.0129		1010.2	0.78
1986-09-06	22.4	26.1	19.7	22.5	22.5	24.5	24.4	23.3	20.8	17.2		17.4	12		114.583	51	410.906	0.0077		1012.5	0.63
1986-09-07	23.6	29.1	17.9	23.7	23.8	24.2	23.9	23.3	20.8	17.2		17.3	0		210.647	95	398.872	0.0193		1008.9	0.62
1986-09-08	23.7	27	20.5	23.7	23.5	24.6	24.1	23.2	20.8	17.5		17.4	0		157.406	72	409.649	0.01		1007.6	1.02
1986-09-09	22.4	25.9	20.1	22.4	22.2	24.1	23.8	23.2	20.8	16.9		16.9	7.5		146.99	74		0.0059			1.15
1986-09-10	22.6	26.4	20	22.5	22.4	23.8	23.6	23.1	20.8	17.8		17.8	4.5		111.11	57	412.657	0.0089		1002.9	0.81
1986-09-11	24.3	29.1	20	24.2	24.2	24.2	23.7	23	20.8	16.2		16.4	0.5		212.962	95	399.336	0.0189		1003.4	0.65
1986-09-12	20.9	22.8	19.6	20.9	20.9	23.1	23.3	23	20.8	16.1		16	2.5		40.509	14	417.264	-0.0037		1008.6	0.96
1986-09-13	22.4	27	19.8	22.2	22	23.4	23	22.8	20.8	17.2		14.4	13		156.249	81	401.489	0.0185		1008.1	0.94
1986-09-14	20.2	22.8	18.6	20.3	20.2	22.4	22.6	22.8	20.8	15		15.4	4.5		84.4902	37	402.432	0.0094		1008.4	0.69
1986-09-15	19.8	22.1	18.2	20.1	20.2	21.8	22	22.6	20.8	15.2		15.5	0.5		42.8238	11	410.087	0.0001		1010.1	0.44
1986-09-16	19.7	21.3	18.5	19.9	19.8	21.6	21.7	22.4	20.8	15.4		15.7	1		40.509	18	410.09	0.0014		1011.8	0.64
1986-09-17	20.6	22.2	19.1	20.7	20.6	21.7	21.6	22.1	20.7	16.7		16.9	10.5		32.4072	16	417.344	0.0178		1006.5	0.54
1986-09-18	22.8	27.9	18.7	22.8	22.7	22.8	22	21.9	20.7	18.1		18.3	0		158.564	77	403.477	0.0199		1004.7	0.57
1986-09-19	22.1	24.3	20	22.4	22.4	22.7	22.4	21.9	20.6	15.2		15.7	0		82.1754	38	413.047	0.0005		1009.3	0.72
1986-09-20	20.3	22	18.4	20.7	20.7	21.8	21.9	22	20.6	14.6		15.1	0.5		26.6202	9	416.585	-0.0026		1012.1	0.88
1986-09-21	19.2	20.7	17.1	19.1	19	21.2	21.3	21.8	20.5	15.6		15.7	0.5		35.8794	18	408.171	0.0058		1009.8	0.49
1986-09-22	24.4	30.3	18.9	24.5	24.4	23.1	22.1	21.6	20.4	17.8		18	0		179.397	83	406.757	0.0173		1004.5	1.03
1986-09-23	20.7	25.5	15.8	21.4	21.8	21.9	21.9	21.7	20.4	13.2		13.8	0		177.082	73	380.084	0.0124		1011.4	0.66
1986-09-24	21.5	27.1	15.7	21.7	21.9	21.7	21.6	21.6	20.3	15		15.1	0		186.341	74	384.704	0.0182		1009.6	0.58
1986-09-25	19.7	23.7	15.9	19.8	19.6	21.3	21.5	21.6	20.3	12.1		12.5	9.5		155.092	64	378.076	0.0234		1012.4	1.37
1986-09-26	19	24.2	14.5	19	18.9	20.6	20.9	21.5	20.2	10.1		10.8	2		215.276	82	356.8	0.0206		1015.5	0.95
1986-09-27	17.4	22.4	11.2	18.2	18.6	19.7	20.3	21.3	20.2	8.9		9.4	0		189.814	62	352.992	0.0109		1015.5	0.89
1986-09-28	18.5	25.2	10.6	18.7	18.7	19.4	19.7	21	20.1	11.3		11.5	0		199.073	76	359.388	0.0196		1012.5	0.8
1986-09-29	19	21.9	17.4	19.2	19.2	19.7	19.9	20.8	20.1	13.2		13.5	0.5		47.4534	4	402.652	0.0038		1005.5	1.18
1986-09-30	19.6	26	14	19.9	20	20	19.9	20.7	20	12.4		12.6	0		193.286	72	367.285	0.0185		1010	0.75
1986-10-01		19.3								9	27.5	8.9	4		5.787	-6		-0.0054			0.74
1986-10-02	19.6	22.5	17.1	19.9	20	20.1	19.8	20.4	19.9	15.7		15.5	7		84.4902	37	397.229	0.0198		1010.4	0.83
1986-10-03	20.3	24.6	17.9	20.4	20.3	20.6	20.2	20.3	19.8	14.6		14.5	0		140.045	55	386.015	0.0031		1011.6	1.02
1986-10-04	18.4	22	16.4	18.5	18.4	19.9	20	20.3	19.7	12.4		12.4	0		93.7494	37	385.417	0.0129		1013.3	0.94
1986-10-05	18.2	22.4	13.4	18.6	18.6	19.5	19.7	20.3	19.7	10.8		10.8	0		142.36	58	369.283	0.0175		1015.4	1.06
1986-10-06	18	23	12.8	18.5	18.6	19	19.2	20.2	19.6	11.6		11.9	0		124.999	49	373.572	0.0154		1013.8	0.47
1986-10-07	17.5	20.1	15.8	17.7	17.6	18.9	19.2	20	19.6	11.3		11.3	8		63.657	25	388.024	-0.001		1013.6	1.56
1986-10-08	13.3	16.2	7.9	14.3	14.6	16.8	18.1	19.9	19.5	8.3		8.2	17		23.148	-7	377.496	0.0028		1004.5	1.26
1986-10-09	15.2	22.5	7.3	16.4	16.9	16.2	16.9	19.5	19.5	8.8		8.1	0		180.554	71	340.249	0.0197		1011.9	0.51
1986-10-10	16.4	21	10.3	16.9	17	17	17.3	19.1	19.4	10.8		10.2	0		105.323	35	369.057	0.0067		1014.3	1.06
1986-10-11	16.3	18.6	14.7	16.4	16.2	17.6	17.6	18.9	19.3	12.1		12	15		32.4072	8	390.949	0.0023		1006.6	1.01
1986-10-12	14.4	16.9	12.8	14.4	14.3	17.2	17.4	18.8	19.2	9.4		9.7	1		92.592	48	360.922	0.0086		1005.3	0.86
1986-10-13	14.8	21.1	8.3	15.2	15.5	16.6	17	18.7	19	9.9		9.4			178.24	71	338.957	0.0303		1008.5	0.5
1986-10-14	15	21.5	8.9	15.8	16	16.5	16.9	18.5	18.9	8.5		8.6	0		164.351	58	341.367	0.0175		1012.6	0.48
1986-10-15	15.6	22.8	9.5	16.8	17.4	16.5	16.7	18.3	18.8	9.8		9	0		167.823	55	344.689	0.0215		1011.9	0.44
1986-10-16	15.3	22.8	9.8	16.6	17.3	16.4	16.7	18.2	18.7	9.9		9.1	0		158.564	50	345.496	0.0181		1008.8	0.48
1986-10-17	13.2	20	8.6	13.8	14	15	16.1	18	18.6	2.3		2.3	0		174.767	56	320.37	0.0157		1009.1	1
1986-10-18	8.2	16.1	0	8.8	9	13.5	15.1	17.8	18.5	-1		-0.1	0		171.295	39	295.628	0.0233		1018.2	0.53
1986-10-19						12.5	14.1	17.5	18.4	1.4		1	0		134.258	23		0.0134		1020.7	0.93
1986-10-20						12.3	13.7	17	18.6	-0.6		-0.7	0		184.027	41		0.0212		1023.7	0.76
1986-10-21						12	13.2	16.6	18.4	3.4		3.1	0		173.61	50		0.021		1018.9	0.58
1986-10-22						13.6	13.9	16.3	18.3	6.1		6.4	1.5		49.7682	7		0.0026		1007	0.66
1986-10-23		15.9		7.5	7.6	11.6	13.2	16.1	18.1	-1.8		-1.2	0		177.082	49		0.0283		1017.5	0.41
1986-10-24	10.7	15.8	4.8	11.1	11.1	12.2	12.9	15.9	18	3.6		3.8	0		81.018	26	339.753	0.0136		1021.2	0.43
1986-10-25	11.9	19	6.8	12.5	12.7	12.9	13.3	15.6	17.8	6.4		6.2	0		119.212	26	333.941	0.0144		1015.8	0.59
1986-10-26	12.9	19.5	5.8	13.3	13.6	13	13.3	15.5	17.6	7.1		6.9	0		120.37	35	338.523	0.0145		1009.3	0.64
1986-10-27	12.9	15.4	10.8	13.1	13.1	13.9	14	15.4	17.5	7.5		7.9	2		60.1848	15	359.698	-0.0007		1007.4	0.99
1986-10-28	11.4	15.5	8.2	12.3	12.6	13.2	13.7	15.4	17.4	5.9		6	0		56.7126	10	352.571	0.0072		1013.7	0.37
1986-10-29	12.3	15.8	8.5	12.5	12.6	13.1	13.4	15.4	17.2	7.8		7.7	0.5		46.296	7	361.694	0.0038		1013.1	0.51
1986-10-30	11.5	14.9	4.7	11.9	12	13.6	13.9	15.3	17.1	7.6		7.9	3		54.3978	7	354.347	0.0034		1012.1	0.88
1986-10-31	7.7	15.1	0.7	9.4	10.1	11.2	12.6	15.2	17	0.5		-0.2	0		164.351	33	291.107	0.0274		1023.2	0.47
1986-11-01	9.1	15.4	2.2	9.5	9.7	10.8	11.8	15	16.9	3.7		3.5	5.5		83.3328	24		0.0202			0.48
1986-11-02	13.3	19.8	8.3	14	14.1	13.2	13	14.7	16.8	7.8		8.6	0.5		130.786	40		0.0187			0.56
1986-11-03	13.8	19.5	6.6	15	15.6	13	13	14.6	16.7	8.4		7.6	0		113.425	39		0.0115			0.57
1986-11-04	15.6	19.9	13	15.5	15.4	14.8	14.1	14.6	16.6	8.8		8.9	9		99.5364	42		0.0308			0.92
1986-11-05	11.4	13.2	8.7	11.6	11.5	13.6	13.9	14.8	16.5	4.8		5.1	0.5		16.2036	-6		-0.0023			0.97
1986-11-06	9	16.9	2.9	10.3	10.9	12	12.9	14.8	16.4	3		2	0		140.045	30		0.0228			0.43
1986-11-07	10.6	15.4	4.1	11.4	12	11.6	12.2	14.6	16.3	5.3		5.3	0		46.296	12		0.0062			0.43
1986-11-08	11	19.2	5	12	12.4	12.2	12.5	14.4	16.3	4.3		3.9	0		108.796	22	326.012	0.0154		1010.9	0.49
1986-11-09	10.4	13.1	7.3	10.7	10.7	11.8	12.3	14.3	16.2	4.8		4.5	5.5		24.3054	3	358.897	-0.0023		1012.7	1.14
1986-11-10	11.7	19.4	5.8	13	13.3	12.2	12.4	14.1	16.1	4.1		4.5	5.5		148.147	41	312.952	0.0237		1003.4	0.62
1986-11-11	7.9	14.4	-0.3	9	9.4	10.4	11.7	14	16	-2.7		-2.9	0		150.462	20	287.18	0.0127		1008.9	1.14
1986-11-12	6.8	14.1	-1.3	8.8	9.8	9	10.5	13.8	15.9	-2.1	-1.2	-1.9	0		131.944	28	290.411	0.0188		1020.9	0.45
1986-11-13	8.7	13	6.1	9.3	9.6	10.3	10.8	13.4	15.8	2.6	3.2	2.3	0		46.296	7	339.166	0.0083		1017.5	0.46
1986-11-14	11.1	18.6	4.7	12.1	12.7	10.9	11	13.2	15.7	4.5	5.3	4.6	0		104.166	28	326.205	0.0197		1012.7	0.37
1986-11-15	10.6	15.1	7	11.3	11.6	11.3	11.5	13.1	15.6	4.5	5	4	0		52.083	10	346.074	-0.0007		1009	0.79
1986-11-16	8.1	14	1.1	9.1	9.3	9.9	11	13.1	15.5	-3.9	-3.1	-3.8	0		100.694	8	306.056	0.0085		1012.6	1.09
1986-11-17	5.5	9.2	-1.3	6.3	6.5	8.6	9.9	13	15.3	-2.3	-1.8	-2.6	0		39.3516	3	324.972	0.0089		1017.5	0.39
1986-11-18	5.7	14.6	-1.5	7.8	8.5	8.4	9.6	12.7	15.3	0.1	0.3	-1.6	0		124.999	17	288.024	0.0221		1016.1	0.4
1986-11-19	4.8	12.1	-0.1	6.4	7.1	7.7	9	12.5	15.2	0.9	1.2	-0.4	0		53.2404	-1	315.714	0.0049		1014.8	0.33
1986-11-20	5.7	13.9	-1.2	7.3	8.1	7.3	8.4	12.1	15	0.8	0.9	-0.4	0		100.694	23	298.04	0.0175		1017.1	0.39
1986-11-21		13.2		6	6.7	6.5	7.5	10.3	13.1	0.7	0.8	-0.6	0			-2		0.0046			0.44
1986-11-22	8.1	16.6	0.6	9.6	10.2	8.5	9	11.6	14.8	0.7	1.1	0	0		119.212	22	299.503	0.0197		1022.5	0.55
1986-11-23	6	13.9	-2.3	7.4	8.2	7.3	8.4	11.5	14.6	-0.6	-0.1	-1.4	0		121.527	24	287.997	0.015		1028.4	0.5
1986-11-24	7.4	9.8	3.3	7.4	7.4	8.1	8.6	11.2	14.5	2.5	2.9	2	0		16.2036	7	346.278	0.0045		1023.4	0.5
1986-11-25	10.1	15.5	5.9	10.6	10.8	9.8	9.5	11.1	14.4	7	7.1	5.8	8		68.2866	27	335.528	0.0233		1006.4	0.53
1986-11-26	6.8	10.8	-1.8	7.5	7.8	8.5	9.4	11.2	14.2	-4.5	-4	-4.6	0		79.8606	1	306.521	0.0084		1012.9	1.4
1986-11-27	4.1	10.4	-1.2	5.4	5.8	6.7	8.1	11.2	14.1	-6	-5.8	-6	0		106.481	4	280.563	0.0142		1025.9	0.57
1986-11-28	5.1	8	-0.2	5.2	5.4	6.7	7.6	11	14	-1.5	-1.4	-1.8	0		18.5184	4	333.069	0.0049		1023.6	0.5
1986-11-29	6.5	13	2.1	6.6	6.7	7.8	8.2	10.7	13.9	0.4	0.7	0.2	0.5		64.8144	30	315.193	0.0053		1015.9	1.19
1986-11-30	3.6	8.4	0.5	4.5	4.9	6.9	7.9	10.7	13.8	-1.9	-1.5	-2.2	0		84.4902	12	291.068	0.0105		1020.6	0.45
1986-12-01	4.5	12.9	-2.7	5.8	6.4	6.6	7.5	10.6	13.7	-2.2	-2.2	-3.3	0		109.953	0	282.1	0.0181		1017.5	0.57
1986-12-02	3.4	10.9	-2.6	5.4	6.3	5.9	7.1	10.5	13.5	-3.1	-3	-4.5	0		112.268	5	275.487	0.0135		1023.1	0.43
1986-12-03	2.9	6.1	-1.8	3.2	3.4	5.4	6.6	10.3	13.4	-0.2	0	-1.1	3.5		20.8332	0	321.154	0.0048		1016.8	0.57
1986-12-04	7.2	11.4	4.9	7.5	7.7	7.1	7.2	10.1	13.3	1	1.3	0.4	0		38.1942	-6	331.816	0.0007		1002.2	0.86
1986-12-05	6.4	12.6	-0.4	7.6	8.1	6.7	7.4	10	13.2	-5.2	-4.9	-5.6	0		118.055	-2	281.484	0.0081		1010.6	1.25
1986-12-06	6.2	13.3	-1.8	7.4	8.1	6.6	7.1	10	13.1	-1.6	-1.5	-2.6	0		105.323	4	290.207	0.0075		1018.1	0.62
1986-12-07	7.2	16.7	-0.2	7.9	8.3	7.1	7.4	9.9	12.9	-1.2	-1.2	-2.5	0		98.379	-4	297.8	0.0104		1009	0.94
1986-12-08	2.7	10.8	-3.6	5.6	7.1	5.9	7.1	9.8	12.8	-6.2	-5.5	-6.4	0		115.74	-2	266.318	0.012		1017.9	0.41
1986-12-09	2.4	12.7	-3.3	4.6	6.3	5.1	6.3	9.7	12.7	-4.6	-4.3	-5.5	0		112.268	-4	267.866	0.0131		1019.2	0.51
1986-12-10		13.2	-4	4	4.7	4.3	5.1	7.9	10.5	-1.6	-1.6	-2.7	0		67.1292	-1		0.0078			0.5
1986-12-11	8.2	15.8	0.2	9.9	10.4	6.8	7.1	9.4	12.5	-3.9	-3.7	-4.5	0		113.425	-3	290.552	0.0085		1012.9	1.71
1986-12-12	4.2	12	-0.9	6	6.9	5.6	6.7	9.4	12.5	-0.4	-0.6	-2.5	0		47.4534	-2	311.321	0.0063		1018.5	0.48
1986-12-13	6.7	13.4	-2.1	7.7	8.2	6.1	6.4	9.3	12.4	1.5	1.2	-0.4	0		87.9624	9	302.192	0.0111		1022.9	0.7
1986-12-14	9	10.6	7.4	9.2	9.2	8.3	7.8	9.2	12.2	4.3	4.5	3.4	3		18.5184	1	351.932	0.0011		1013.6	0.46
1986-12-15	6.4	10.5	0.3	7.1	7.4	7.7	8.1	9.3	12.1	3	3.3	2.1	23		16.2036	-12	340.23	0.0116		1005.8	1.41
1986-12-16	2.7	9.7	-2.3	4.2	5.2	5.2	6.7	9.4	11.8	-3.6	-3.7	-4.7	0		114.583	-3	267.16			1016.6	0.59
1986-12-17	3.3	10.2	-3.4	4.6	5.2	4.1	5.8	9.1	11.7	-5.2	-4.9	-6	0		108.796	-10	270.756	0.0036		1020.3	0.91
1986-12-18	2.4	5.4	-2.7	2.7	3	4	5.3	8.8	11.7	-2.4	-2.1	-3	5		12.7314	-2	322.644	0.0175		1020.1	0.61
1986-12-19	8.2	12.9	3.9	8.3	8.4	7.4	6.4	8.4	10.7	4.7	5	4.1	34		33.5646	11	339.137	0.0004		996.6	1.33
1986-12-20	5.1	9.6	-3.5	6	6.4	5.9	6.8	8.3	10.3	-6.2	-5.7	-6.1	0		115.74	-2	272.789	0.008		1008.9	1.46
1986-12-21	1	7.5	-4.1	2.1	3	3.2	5.1	8.3	10.4	-4.9	-4.5	-5.2	0		49.7682	-8	293.218	0.0054		1014.7	1.38
1986-12-22	2.2	7.9	-2	3.1	3.6	3.2	4.6	8.1	10.5	-8.5	-8.1	-8.6	0		112.268	-7	261.462	0.0085		1015.2	1.51
1986-12-23	0.4	7.5	-4.8	2	2.7	2.1	3.9	7.8	10.6	-7.8	-7.6	-8	0		96.0642	-7	263.525	0.008		1019	1.27
1986-12-24	2.8	12.2	-3.6	4.8	6.1	3	3.9	7.5	10.6	-3.4	-3.4	-4.4	0		101.851	-2	273.042	0.0089		1011.6	1.2
1986-12-25	3.2	7.2	-1.8	4.3	5.3	2.8	3.9	7.3	10.6	0.1	-0.4	-1.7	0		20.8332	-14	321.577	0.0039		1012.6	1.25
1986-12-26	4.1	11.5	-2.2	5.5	6.2	3.8	4.3	7.1	10.5	-4.1	-4.3	-5.1	0		108.796	1	273.975	0.02		1014.8	1.41
1986-12-27	3.2	6.7	-1.3	3.9	4.2	3.5	4.2	7.1	10.5	-6	-5.7	-5.9	0		56.7126	5	297.973	0.0031		1017.6	1.41
1986-12-28	0.9	1.7	0	0.9	0.8	3.7	4.4	7	10.4	-2	-1.8	-2.5	10		28.935	8	305.803	0.0084		1007	1.64
1986-12-29	1	7.2	-4.6	2.6	3	2.9	4	6.9	10.3	-7.5	-7.1	-7.4	0		112.268	3	257.453	0.0081		1012.4	1.34
1986-12-30		9.1		2.7	3.8	1.8	3.3	6.8	10.2	-5.8	-5.7	-6.3	0		101.851	-5		0.0086		1017	1.41
1986-12-31	3.7	9.2	-1	4.5	4.9	3.4	3.6	6.6	10.1	-2.3	-2.3	-3	0		81.018	2	288.5	0.0066		1009.5	1.4
1987-01-01	3.9	7.6	-2.9	4.8	5	3	3.8	6.5	10.1	-8.6	-8.5	-8.9	0		122.684	-10	262.392	0.0097		1012.6	1.69
1987-01-02	-0.2	3.5	-5.2	0.6	1	1.3	3	6.5	10	-6.8	-6.8	-7	3.5		33.5646	-1	297.204	0.0037		1020.3	1.51
1987-01-03	4	9.4	0.4	4.6	4.8	4.5	3.8	6.3	9.9	0.5	0.4	-0.3	3.5		83.3328	19	290.931	0.011		1004.4	1.55
1987-01-04	4.5	10.6	-3	5.6	6	3.9	4.4	6.3	9.8	-7.1	-6.8	-6.9	0		121.527	-5	266.886	0.0086		1010.4	1.44
1987-01-05	-0.3	3.5	-3.1	0.2	0.4	2.2	3.6	6.4	9.7	-6.1	-5.9	-5.9	0		31.2498	0	298.451	0.0117		1017.3	1.12
1987-01-06	-0.1	3.3	-2.5	0.5	0.8	2.5	3.4	6.3	9.6	-2.9	-3	-3.9	9		114.583		256.963	0.0245		1014.4	1.34
1987-01-07	-0.5	4	-5.9	0.6	1.4	1.9	3	6.2	9.6	-4.8	-5	-5.9	0		67.1292		277.774	-0.0029		1019.1	1.05
1987-01-08	2.8	12.1	-2	4.3	5	2.6	3.1	6	9.5	-5.1	-5	-5.2	0		113.425	4	266.758	0.0032		1006	1.25
1987-01-09	4.1	12.9	-3.2	5.8	6.4	2.9	3.3	5.9	9.4	-3.8	-3.9	-4.3	0		115.74	2	272.139	0.0044		1006.4	1.35
1987-01-10	1.1	7.2	-1.9	1.4	1.5	2.7	3.5	5.8	9.3	-8.6	-8.6	-8.9	0		90.2772	-9	270.14	0.0104		1009.7	1.43
1987-01-11	-1.4	3.3	-5.9	-0.4	0	1.3	2.9	5.8	9.2	-12.4	-12.3	-12.5	0		126.157	-12	240.44	0.01		1020.3	1.16
1987-01-12	-1.3	1.4	-6.8	-1.1	-0.9	0.7	2.3	5.7	9.1	-6.3	-6.3	-6.7	6.5		32.4072	6	293.857	0.0081		1010.6	1.13
1987-01-13	2.7	8.2	-0.2	2.8	2.7	2.9	2.7	5.5	9.1	-4.3	-4.2	-4.6	4.5		108.796	23	270.364	-0.0045		991.4	1.45
1987-01-14	0.9	6.1	-4.1	2.3	2.9	1.8	2.8	5.4	9	-11	-10.6	-10.4	0		128.471	-6	249.329	0.0078		1009.3	1.1
1987-01-15	2.8	10.3	-4.9	4.1	4.6	1.5	2.5	5.4	8.9	-5.8	-6	-6.5	0		126.157	4	262.077	0.0057		1017.8	1.12
1987-01-16	4.3	10.7	-1.1	5.4	5.7	3.3	3	5.3	8.8	-1.4	-1.7	-2.6	0		82.1754	16	293.703	0.0092		1020.4	0.5496
1987-01-17	6.7	15.2	-0.3	7.6	7.9	4.4	3.8	5.3	8.7	-1.2	-1.5	-2.4	0		98.379	3	295.943	0.0076		1003.7	0.82
1987-01-18	4.4	9.2	-1.9	5	5.2	3.6	4	5.4	8.7	-9.5	-9.4	-9.6	0		128.471	-7	264.981	0.0091		1009.2	1.42
1987-01-19	1.5	8.3	-3.3	1.9	2.2	2.5	3.4	5.5	8.6	-6.8	-6.8	-7.1	0		96.0642	4	272.144	0.0101		1009.4	1.02
1987-01-20	-0.9	4.5	-7.3	-0.1	-0.1	2.8	3.4	5.5	8.6	-10.7	-10.5	-10.9	1		133.101	2	243.192	0.0068		1016.2	0.92
[truncated: 11,303 more rows]
