# Supplementary material for: A database of water and heat observations over grassland in the north-east of Japan
Source: Copernicus journal article supplement (doi:10.5194/essd-2018-58), 2018-08-06
Supplement: Supplementary file [file Suppliment_Landuse.pdf › Supplement/Suppliment_Landuse.pdf]

36°15'0"N  
36°10'0"N  
36°5'0"N  
36°0'0"N

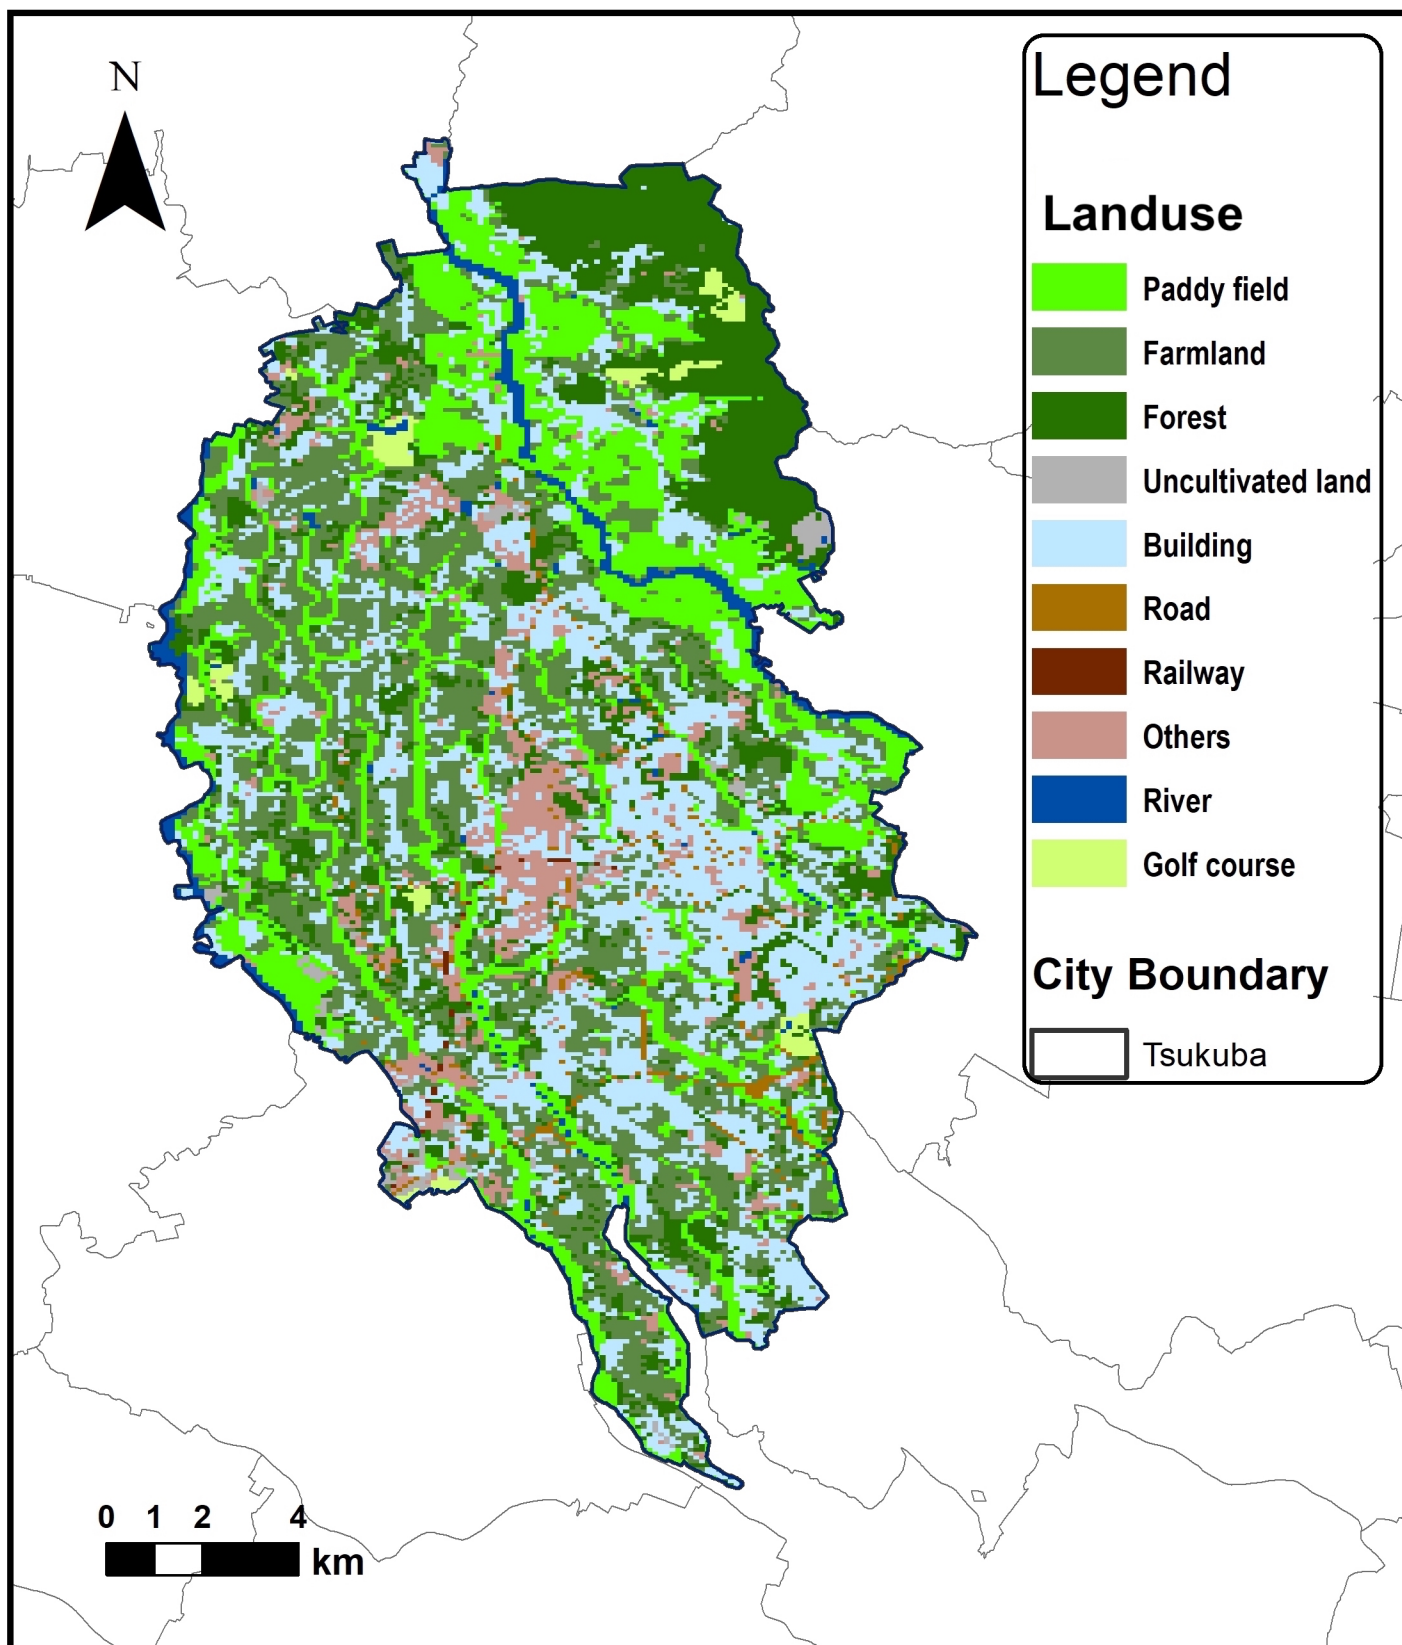

## Legend

### Landuse

- Paddy field
- Farmland
- Forest
- Uncultivated land
- Building
- Road
- Railway
- Others
- River
- Golf course

### City Boundary

- Tsukuba

140°0'0"E 140°5'0"E 140°10'0"E 140°15'0"E
